# Supplementary material for: Fathead minnow exposed to environmentally relevant concentrations of metformin for one life cycle show no adverse effects
Source: Atypon-hosted journal article supplement (doi:10.1139/facets-2020-0106), 2021-01-01
Supplement: facets-2020-0106_supplement2.pdf [file facets-2020-0106_supplement2.pdf]

## Supplementary Material 2

### Tables and Figures – FACETS

**Fathead minnow exposed to environmentally relevant concentrations of metformin for one life cycle show no adverse effects.**

Joanne L. Parrott\*, Grazina Pacepavicius, Kallie Shires, Stacey Clarence, Hufsa Khan, Madelaine Gardiner, Cheryl Sullivan, and Mehran Alaei.

Table S1. Liquid chromatography gradient conditions for metformin and guanylyurea analysis in exposure tanks during the fathead minnow life cycle test.

| TIME<br>(min) | FLOW<br>(mL/min) | % Water | % Methanol |
|---------------|------------------|---------|------------|
| Metformin     |                  |         |            |
| Initial       | 0.15             | 90      | 10         |
| 5             | 0.15             | 90      | 10         |
| 12            | 0.15             | 0       | 100        |
| 15            | 0.15             | 0       | 100        |
| 20            | 0.15             | 90      | 10         |
| 35            | 0.15             | 90      | 10         |
| Guanylyurea   |                  |         |            |
| Initial       | 0.15             | 90      | 10         |
| 1.2           | 0.15             | 0       | 100        |
| 5             | 0.15             | 0       | 100        |
| 7             | 0.15             | 90      | 10         |
| 20            | 0.15             | 90      | 10         |

Table S2. The precursor to product transitions monitored for native and labelled metformin and guanylurea. Two ions were chosen so that a ratio between the two could be used as a further confirmation of compound identity.

| Electrospray Conditions                 |                 |               |                  |          |                      |
|-----------------------------------------|-----------------|---------------|------------------|----------|----------------------|
| Collision Gas Flow (mL/min)             |                 | 0.15          |                  |          |                      |
| Desolvation Temperature                 |                 | 300 °C        |                  |          |                      |
| Gas Flow: Desolvation (L/Hr)            |                 | 800           |                  |          |                      |
| Cone (L/Hr)                             |                 | 150           |                  |          |                      |
| Nebuliser(Bar)                          |                 | 7             |                  |          |                      |
| Source Voltages: Capillary (KV)         |                 | 0.94          |                  |          |                      |
| Cone (V)                                |                 | 0             |                  |          |                      |
| Source Offset (V)                       |                 | 50            |                  |          |                      |
| Source Temperature                      |                 | 150 °C        |                  |          |                      |
| MS/MS Transitions                       |                 |               |                  |          |                      |
| Compound                                | Precursor (m/z) | Product (m/z) | Dwell Time (sec) | Cone (V) | Collision Energy (V) |
| Metformin                               | 130.1           | 60.2          | 0.25             | 15       | 18                   |
| Metformin                               | 130.1           | 71.2          | 0.25             | 15       | 20                   |
| D6 Metformin                            | 136.3           | 77.2          | 0.25             | 16       | 19                   |
| D6 Metformin                            | 136.3           | 119.3         | 0.25             | 16       | 14                   |
| Guanylurea                              | 102.87          | 43.1          | 0.25             | 47       | 14                   |
| Guanylurea                              | 102.87          | 60.5          | 0.25             | 38       | 14                   |
| Guanylurea                              | 102.87          | 86.5          | 0.25             | 53       | 14                   |
| <sup>15</sup> N <sub>4</sub> Guanylurea | 107.53          | 63.4          | 0.25             | 40       | 11                   |
| <sup>15</sup> N <sub>4</sub> Guanylurea | 107.53          | 89.4          | 0.25             | 40       | 11                   |

Table S3. Feeding chart of fathead minnows over time during the life cycle exposure to metformin.  
Abbreviations: dph = days post-hatch

| <b>Age of fish (dph)</b> | <b>24 h-old Newly hatched brine shrimp (<math>\mu\text{L}/\text{fish}/\text{day}</math>)</b> | <b>48 h -old Newly hatched brine shrimp (<math>\mu\text{L}/\text{fish}/\text{day}</math>)</b> | <b>Volume for re-suspending newly hatched brine shrimp (mL)</b> | <b>Frozen brine shrimp (thawed) (<math>\mu\text{L}/\text{fish}/\text{day}</math>)</b> | <b>Milestones</b>                                 |
|--------------------------|----------------------------------------------------------------------------------------------|-----------------------------------------------------------------------------------------------|-----------------------------------------------------------------|---------------------------------------------------------------------------------------|---------------------------------------------------|
| 1-9                      | 10                                                                                           | -                                                                                             | 20                                                              | -                                                                                     |                                                   |
| 9-16                     | 60                                                                                           | -                                                                                             | 20                                                              | -                                                                                     | 9 - 17 dph; release from egg cups                 |
| 16-22                    | -                                                                                            | 120                                                                                           | 50                                                              | -                                                                                     |                                                   |
| 22-30                    | -                                                                                            | 180                                                                                           | 50                                                              | -                                                                                     |                                                   |
| 30-35                    | -                                                                                            | 120                                                                                           | 50                                                              | 100                                                                                   | 30 dph; cull to 20 fish per tank                  |
| 35-45                    | -                                                                                            | 60                                                                                            | 50                                                              | 120                                                                                   |                                                   |
| 45-50                    | -                                                                                            | 50                                                                                            | 50                                                              | 150                                                                                   |                                                   |
| 50-65                    | -                                                                                            | 50                                                                                            | 50                                                              | 200                                                                                   | 60 dph; cull to 15                                |
| 65-72                    | -                                                                                            | -                                                                                             | -                                                               | 300                                                                                   |                                                   |
| 72-84                    | -                                                                                            | -                                                                                             | -                                                               | 500                                                                                   | 75 dph - cull to 12 - add breeding tiles          |
| 84-110                   | -                                                                                            | -                                                                                             | -                                                               | 600                                                                                   | 90 dph; cull and sexing, depending on development |
| 110+                     | -                                                                                            | -                                                                                             | -                                                               | 700                                                                                   |                                                   |

Table S4. Water quality data in exposure aquaria during the life cycle exposure of fathead minnows to metformin.

| Tank # | Metformin (µg/L) | n  | Temperature (°C) | Conductivity (µS/cm) | pH   | Dissolved oxygen (mg/L) | Free ammonia (mg/L) |
|--------|------------------|----|------------------|----------------------|------|-------------------------|---------------------|
| 1      | Controls         | 25 | 24.9             | 334.9                | 8.20 | 7.92                    | 0.00040             |
| 3      | Controls         | 25 | 24.9             | 335.0                | 8.17 | 7.84                    | 0.00000             |
| 7      | Controls         | 25 | 25.0             | 334.8                | 8.15 | 7.80                    | 0.00000             |
| 10     | Controls         | 25 | 25.0             | 335.0                | 8.16 | 7.80                    | 0.00040             |
| 11     | Controls         | 25 | 25.0             | 335.6                | 8.18 | 7.84                    | 0.00000             |
| 13     | Controls         | 25 | 25.0             | 334.8                | 8.20 | 7.86                    | 0.00000             |
| 16     | Controls         | 25 | 25.0             | 335.2                | 8.22 | 7.88                    | 0.00000             |
| 19     | Controls         | 25 | 25.0             | 335.3                | 8.22 | 7.88                    | 0.00000             |
| 4      | 3.0              | 25 | 25.0             | 335.3                | 8.15 | 7.80                    | 0.00000             |
| 9      | 3.0              | 25 | 25.0             | 334.3                | 8.23 | 7.89                    | 0.00000             |
| 15     | 3.0              | 25 | 25.0             | 335.7                | 8.18 | 7.83                    | 0.00208             |
| 17     | 3.0              | 25 | 25.1             | 335.3                | 8.21 | 7.87                    | 0.00000             |
| 5      | 31               | 25 | 25.0             | 335.4                | 8.15 | 7.78                    | 0.00042             |
| 8      | 31               | 25 | 25.0             | 335.5                | 8.21 | 7.86                    | 0.00083             |
| 12     | 31               | 25 | 25.0             | 335.7                | 8.20 | 7.87                    | 0.00042             |
| 20     | 31               | 25 | 25.1             | 335.3                | 8.18 | 7.82                    | 0.00042             |
| 2      | 322              | 25 | 25.0             | 335.6                | 8.19 | 7.84                    | 0.00000             |
| 6      | 322              | 25 | 25.0             | 336.0                | 8.15 | 7.79                    | 0.00042             |
| 14     | 322              | 25 | 25.0             | 335.3                | 8.18 | 7.81                    | 0.00042             |
| 18     | 322              | 25 | 25.0             | 335.2                | 8.23 | 7.87                    | 0.00250             |
|        |                  |    |                  |                      |      |                         |                     |
|        | max              |    | 25.1             | 336.0                | 8.23 | 7.92                    | 0.00250             |
|        | min              |    | 24.9             | 334.3                | 8.15 | 7.78                    | 0.00000             |
|        | mean             |    | 25.0             | 335.3                | 8.19 | 7.84                    | 0.00042             |
|        | s.d.             |    | 0.1              | 0.4                  | 0.03 | 0.04                    | 0.00069             |

Table S5. Water quality data in incoming dilution water to the aquatic life research facility during the life cycle exposure of fathead minnows to metformin. Each parameter was measured 8 times, so the means and standard deviation (s.d.) are calculated from 8 measurements.

| Analyte                                | Units | Mean   | s.d.   |
|----------------------------------------|-------|--------|--------|
| Alkalinity, Total (CaCO <sub>3</sub> ) | mg/L  | 91.1   | 3.8    |
| Ammonia as N                           | mg/L  | 0.006  | 0.002  |
| Calcium                                | mg/L  | 36.6   | 1.4    |
| Carbon, Dissolved Inorganic            | mg/L  | 21.9   | 0.8    |
| Carbon, Dissolved Organic              | mg/L  | 1.10   | 0.23   |
| Carbon, Particulate Organic            | mg/L  | 0.11   | 0.41   |
| Chloride                               | mg/L  | 34.0   | 4.0    |
| Fluoride                               | mg/L  | 0.65   | 0.03   |
| Hardness                               | mg/L  | 128.7  | 5.1    |
| Magnesium                              | mg/L  | 8.98   | 0.32   |
| Nitrate/Nitrite as N                   | mg/L  | 0.500  | 0.163  |
| Nitrogen, Particulate Organic          | mg/L  | 0.022  | 0.057  |
| pH                                     | pH    | 7.69   | 0.22   |
| Phosphorus, Total                      | mg/L  | 0.0013 | 0.0015 |
| Potassium                              | mg/L  | 1.77   | 0.08   |
| Silica                                 | mg/L  | 1.25   | 0.29   |
| Sodium                                 | mg/L  | 18.1   | 2.1    |
| Specific conductance (25°C)            | µS/cm | 347.3  | 20.0   |
| Sulfate                                | mg/L  | 27.0   | 0.9    |

Table S6. Raw data for metformin concentrations ( $\mu\text{g/L}$ ) measured every 2 weeks in exposure water during the life cycle exposure of fathead minnows to metformin. nd = not detected (so assigned a value of 0.004423  $\mu\text{g/L}$ ) \*\*duplicate sample

| dph                                             | -4        | -4       | 9        | 23       | 37       | 51       | 65       | 79       | 93       | 107      | 121      | 135      | 149      |
|-------------------------------------------------|-----------|----------|----------|----------|----------|----------|----------|----------|----------|----------|----------|----------|----------|
| tank                                            |           | **       |          |          |          |          |          |          |          |          |          |          |          |
| <b>Controls</b>                                 |           |          |          | all nd   |
| 1                                               | 0.004423  | 0.004423 | 0.025    | 0.004423 | 0.004423 | 0.004423 | 0.004423 | 0.004423 | 0.004423 | 0.004423 | 0.004423 | 0.004423 | 0.004423 |
| 3                                               | 0.004423  | 0.004423 | 0.027    | 0.004423 | 0.004423 | 0.004423 | 0.004423 | 0.004423 | 0.004423 | 0.004423 | 0.004423 | 0.004423 | 0.004423 |
| 7                                               | 0.004423  | 0.004423 | 0.004423 | 0.004423 | 0.004423 | 0.004423 | 0.004423 | 0.004423 | 0.004423 | 0.004423 | 0.004423 | 0.004423 | 0.004423 |
| 10                                              | 0.004423  | 0.004423 | 0.004423 | 0.004423 | 0.004423 | 0.004423 | 0.004423 | 0.004423 | 0.004423 | 0.004423 | 0.004423 | 0.004423 | 0.004423 |
| 11                                              | 0.083     | 0.095    | 0.042    | 0.004423 | 0.004423 | 0.004423 | 0.004423 | 0.004423 | 0.004423 | 0.004423 | 0.004423 | 0.004423 | 0.004423 |
| 13                                              | 0.004423  | 0.004423 | 0.024    | 0.004423 | 0.004423 | 0.004423 | 0.004423 | 0.004423 | 0.004423 | 0.004423 | 0.004423 | 0.004423 | 0.004423 |
| 16                                              | 0.035     | 0.033    | 0.028    | 0.004423 | 0.004423 | 0.004423 | 0.004423 | 0.004423 | 0.004423 | 0.004423 | 0.004423 | 0.004423 | 0.004423 |
| 19                                              | 0.0022116 | 0.004423 | 0.042    | spilled  | 0.004423 | 0.004423 | 0.004423 | 0.004423 | 0.004423 | 0.004423 | 0.004423 | 0.004423 | 0.004423 |
|                                                 |           |          |          |          |          |          |          |          |          |          |          |          |          |
| <b>3.0 <math>\mu\text{g/L}</math> Metformin</b> | -4        | 9        | 23       | 37       | 51       | 65       | 79       | 93       | 107      | 121      | 135      | 149      |          |
| 4                                               | 2.25      | 2.22     | 2.4      | 2.38     | 2.22     | 2.62     | 3.59     | 2.71     | 2.88     | 2.41     | 2.36     | 1.61     | 2.76     |
| 9                                               | 2.66      | 2.61     | 2.73     | 4.34     | 2.78     | 2.78     | 3.15     | 3.02     | 4.16     | 2.03     | 2.25     | 2.21     | 2.1      |
| 15                                              | 3.06      | 2.95     | 3.1      | 3.31     | 2.81     | 3.54     | 3.61     | 3.57     | 3.93     | 3.26     | 3.56     | 3.8      | 4.07     |
| 17                                              | 2.86      | 2.87     | 3.13     | 3.51     | 2.99     | 3.4      | 3.68     | 3.37     | 4.08     | 2.87     | 3.41     | 3.56     | 3.17     |
|                                                 |           |          |          |          |          |          |          |          |          |          |          |          |          |
| <b>30 <math>\mu\text{g/L}</math> Metformin</b>  | -4        | 9        | 23       | 37       | 51       | 65       | 79       | 93       | 107      | 121      | 135      | 149      |          |
| 5                                               | 30.6      | 26.1     | 30.6     | 44.6     | 37.8     | 30.3     | 37.7     | 36.4     | 34.4     | 28.6     | 27.7     | 38.8     | 32       |
| 8                                               | 31.9      | 26.5     | 28.5     | 38.2     | 31.5     | 27.9     | 39.9     | 25.2     | 30       | 28       | 18.1     | 30       | 30.5     |
| 12                                              | 27.6      | 25.3     | 26.6     | 29.8     | 33.9     | 26.2     | 32.8     | 30.1     | 31.4     | 25.8     | 38.1     | 31.4     | 32.1     |
| 20                                              | 32.5      | 28.3     | 27.6     | 38.9     | 30.6     | 28.9     | 31.2     | 26.7     | 23.2     | 26.3     | 33.6     | 31.4     | 30.9     |
|                                                 |           |          |          |          |          |          |          |          |          |          |          |          |          |
| <b>300 <math>\mu\text{g/L}</math> Metformin</b> | -4        | 9        | 23       | 37       | 51       | 65       | 79       | 93       | 107      | 121      | 135      | 149      |          |
| 2                                               | 276       | 275      | 309      | 390      | 306      | 302      | 335      | 349      | 303      | 307      | 322      | 312      | 329      |
| 6                                               | 262       | 267      | 276      | 317      | 308      | 285      | 304      | 372      | 365      | 296      | 278      | 323      | 293      |
| 14                                              | 281       | 280      | 331      | 370      | 399      | 334      | 435      | 379      | 400      | 408      | 410      | 412      | 305      |
| 18                                              | 280       | 280      | 266      | 313      | 319      | 287      | 393      | 304      | 295      | 284      | 293      | 328      | 312      |

Table S7a. Statistical analysis of survival over time data with the two tanks included (tank 9 and 19) where dripping water killed some fish. ANOVA p values assessing differences in survival over time in each treatment during the life cycle exposure of fathead minnows to metformin.

| Time point<br>(dph = days<br>post-hatch) | ANOVA<br>p value | controls                |                       | 3 µg/L metformin        |                       | 31 µg/L metformin       |                       | 322 µg/L metformin      |                       |
|------------------------------------------|------------------|-------------------------|-----------------------|-------------------------|-----------------------|-------------------------|-----------------------|-------------------------|-----------------------|
|                                          |                  | Mean<br>survival<br>(%) | standard<br>deviation | Mean<br>survival<br>(%) | standard<br>deviation | Mean<br>survival<br>(%) | standard<br>deviation | Mean<br>survival<br>(%) | standard<br>deviation |
| Hatch (0 dph)                            | 0.910            | 94.6                    | 2.5                   | 94.2                    | 4.1                   | 95.8                    | 4.2                   | 95.0                    | 3.3                   |
| 9 dph                                    | 0.808            | 90.4                    | 10.3                  | 91.8                    | 3.1                   | 95.0                    | 3.3                   | 91.7                    | 6.4                   |
| 16 dph                                   | 0.711            | 90.4                    | 10.3                  | 90.1                    | 4.5                   | 95.0                    | 3.3                   | 93.3                    | 3.8                   |
| 30 dph                                   | 0.725            | 88.3                    | 9.1                   | 89.3                    | 4.9                   | 93.3                    | 2.7                   | 90.8                    | 7.9                   |
| 45 dph                                   | 0.292            | 88.3                    | 9.1                   | 76.4                    | 23.3                  | 92.2                    | 4.7                   | 90.8                    | 7.9                   |
| 64 dph                                   | 0.238            | 87.8                    | 8.9                   | 75.4                    | 22.8                  | 92.2                    | 4.7                   | 89.6                    | 7.0                   |
| 78 dph                                   | 0.238            | 87.8                    | 8.9                   | 75.4                    | 22.8                  | 92.2                    | 4.7                   | 89.6                    | 7.0                   |
| 92 dph                                   | 0.238            | 87.8                    | 8.9                   | 75.4                    | 22.8                  | 92.2                    | 4.7                   | 89.6                    | 7.0                   |
| 106 dph                                  | 0.143            | 87.8                    | 8.9                   | 73.3                    | 22.2                  | 92.2                    | 4.7                   | 89.6                    | 7.0                   |
| 120 dph                                  | 0.143            | 87.8                    | 8.9                   | 73.3                    | 22.2                  | 92.2                    | 4.7                   | 89.6                    | 7.0                   |
| 141 dph                                  | 0.143            | 87.8                    | 8.9                   | 73.3                    | 22.2                  | 92.2                    | 4.7                   | 89.6                    | 7.0                   |
| End of test                              | 0.311            | 86.3                    | 8.8                   | 73.3                    | 22.2                  | 92.2                    | 4.7                   | 89.6                    | 7.0                   |





Table S8. Raw data for growth of randomly-culled fish over time in each tank during the life cycle exposure of fathead minnows to metformin.

| Metformin concn (µg/L) | Tank | n | Weight (mg) | s.d.  | Total Length (mm) | s.d. | Tail Length (mm) | s.d. | Condition Factor | s.d.  |
|------------------------|------|---|-------------|-------|-------------------|------|------------------|------|------------------|-------|
| 30 dph                 |      |   |             |       |                   |      |                  |      |                  |       |
| Controls               | 1    | 8 | 73.1        | 27.7  | 21.1              | 2.7  | 4.0              | 0.7  | 0.745            | 0.055 |
| Controls               | 3    | 7 | 68.7        | 29.6  | 20.4              | 2.8  | 3.9              | 0.6  | 0.757            | 0.084 |
| Controls               | 7    | 7 | 63.6        | 28.0  | 19.6              | 3.1  | 3.6              | 0.6  | 0.788            | 0.090 |
| Controls               | 10   | 4 | 48.3        | 21.0  | 18.6              | 2.5  | 3.3              | 0.9  | 0.712            | 0.042 |
| Controls               | 11   | 8 | 63.6        | 29.7  | 20.0              | 3.4  | 3.6              | 0.7  | 0.706            | 0.113 |
| Controls               | 13   | 6 | 46.9        | 26.6  | 18.2              | 3.1  | 3.3              | 1.0  | 0.698            | 0.116 |
| Controls               | 16   | 7 | 54.9        | 11.1  | 19.5              | 1.2  | 3.6              | 0.5  | 0.732            | 0.033 |
| Controls               | 19   | 0 |             |       |                   |      |                  |      |                  |       |
| 3.0                    | 4    | 8 | 70.1        | 18.0  | 21.0              | 1.6  | 3.9              | 0.6  | 0.743            | 0.044 |
| 3.0                    | 9    | 8 | 70.5        | 35.9  | 20.4              | 3.5  | 3.6              | 0.7  | 0.766            | 0.084 |
| 3.0                    | 15   | 5 | 70.9        | 20.8  | 21.2              | 1.8  | 4.0              | 0.7  | 0.725            | 0.039 |
| 3.0                    | 17   | 4 | 39.6        | 30.3  | 17.5              | 3.3  | 3.0              | 0.8  | 0.625            | 0.167 |
| 31                     | 5    | 9 | 64.0        | 20.3  | 20.7              | 2.0  | 3.7              | 0.4  | 0.701            | 0.048 |
| 31                     | 8    | 8 | 59.0        | 13.9  | 20.4              | 1.1  | 3.6              | 0.4  | 0.677            | 0.081 |
| 31                     | 12   | 7 | 75.8        | 19.4  | 21.6              | 1.8  | 3.7              | 0.3  | 0.733            | 0.038 |
| 31                     | 20   | 6 | 90.8        | 23.5  | 22.8              | 1.6  | 4.2              | 0.3  | 0.747            | 0.068 |
| 322                    | 2    | 8 | 62.1        | 23.9  | 20.1              | 2.2  | 3.7              | 0.6  | 0.734            | 0.047 |
| 322                    | 6    | 9 | 58.9        | 25.7  | 19.9              | 3.0  | 3.8              | 0.6  | 0.685            | 0.108 |
| 322                    | 14   | 4 | 63.1        | 23.8  | 20.3              | 2.4  | 3.4              | 0.6  | 0.725            | 0.055 |
| 322                    | 18   | 6 | 56.4        | 39.5  | 19.0              | 3.8  | 3.3              | 0.8  | 0.682            | 0.150 |
| 60 dph                 |      |   |             |       |                   |      |                  |      |                  |       |
| Controls               | 1    | 4 | 425.1       | 99.7  | 36.9              | 2.6  | 7.3              | 0.6  | 0.837            | 0.048 |
| Controls               | 3    | 4 | 561.8       | 206.8 | 38.9              | 3.8  | 7.5              | 0.6  | 0.916            | 0.108 |
| Controls               | 7    | 5 | 378.5       | 121.8 | 35.3              | 3.6  | 7.0              | 0.9  | 0.827            | 0.083 |
| Controls               | 10   | 5 | 399.1       | 157.4 | 35.3              | 4.9  | 6.3              | 1.1  | 0.869            | 0.053 |
| Controls               | 11   | 5 | 437.2       | 48.5  | 36.8              | 1.5  | 6.6              | 0.7  | 0.875            | 0.022 |
| Controls               | 13   | 7 | 398.9       | 165.3 | 35.6              | 3.9  | 6.6              | 0.8  | 0.835            | 0.072 |
| Controls               | 16   | 5 | 325.0       | 136.6 | 33.0              | 3.6  | 6.3              | 0.7  | 0.857            | 0.092 |
| Controls               | 19   | 5 | 464.3       | 117.9 | 37.1              | 3.2  | 7.2              | 0.8  | 0.896            | 0.079 |
| 3.0                    | 4    | 4 | 400.0       | 146.4 | 35.3              | 3.3  | 6.8              | 0.5  | 0.880            | 0.091 |
| 3.0                    | 9    | 0 |             |       |                   |      |                  |      |                  |       |
| 3.0                    | 15   | 4 | 341.1       | 183.6 | 32.5              | 5.2  | 6.6              | 1.1  | 0.926            | 0.084 |
| 3.0                    | 17   | 5 | 522.4       | 108.1 | 38.0              | 2.2  | 7.2              | 0.6  | 0.941            | 0.054 |
| 31                     | 5    | 5 | 340.7       | 169.5 | 32.9              | 6.2  | 6.2              | 0.9  | 0.892            | 0.095 |

|          |    |         |       |       |      |     |     |     |       |       |
|----------|----|---------|-------|-------|------|-----|-----|-----|-------|-------|
| 31       | 8  | 5,4,4,4 | 490.4 | 174.1 | 35.8 | 3.9 | 6.5 | 0.4 | 0.926 | 0.049 |
| 31       | 12 | 4       | 425.3 | 81.3  | 37.0 | 2.9 | 7.4 | 0.5 | 0.834 | 0.040 |
| 31       | 20 | 3       | 487.8 | 125.2 | 38.2 | 3.7 | 7.2 | 0.3 | 0.866 | 0.065 |
| 322      | 2  | 5       | 483.1 | 173.3 | 37.3 | 4.4 | 7.3 | 0.8 | 0.884 | 0.097 |
| 322      | 6  | 4       | 500.8 | 78.2  | 37.6 | 1.9 | 7.3 | 0.9 | 0.936 | 0.066 |
| 322      | 14 | 4       | 445.3 | 78.5  | 36.8 | 2.1 | 6.9 | 0.3 | 0.890 | 0.042 |
| 322      | 18 | 5       | 434.5 | 139.6 | 35.8 | 3.8 | 6.2 | 0.8 | 0.913 | 0.089 |
|          |    |         |       |       |      |     |     |     |       |       |
| 78 dph   |    |         |       |       |      |     |     |     |       |       |
| Controls | 1  | 3       | 746.5 | 56.3  | 42.7 | 0.6 | 7.5 | 0.5 | 0.960 | 0.035 |
| Controls | 3  | 3       | 758.9 | 78.7  | 43.3 | 0.6 | 7.8 | 0.8 | 0.931 | 0.068 |
| Controls | 7  | 3       | 554.2 | 263.5 | 40.0 | 5.6 | 7.8 | 1.0 | 0.819 | 0.061 |
| Controls | 10 | 3       | 637.6 | 156.1 | 41.3 | 3.2 | 7.8 | 0.8 | 0.892 | 0.046 |
| Controls | 11 | 3       | 585.5 | 188.2 | 40.0 | 4.0 | 7.5 | 0.5 | 0.889 | 0.048 |
| Controls | 13 | 3       | 682.5 | 252.7 | 41.2 | 4.9 | 7.5 | 1.0 | 0.948 | 0.061 |
| Controls | 16 | 3       | 453.3 | 194.1 | 37.0 | 4.9 | 6.3 | 1.3 | 0.847 | 0.079 |
| Controls | 19 | 3       | 513.1 | 199.3 | 38.0 | 4.6 | 6.8 | 0.8 | 0.898 | 0.049 |
| 3.0      | 4  | 3       | 663.3 | 45.1  | 39.8 | 0.3 | 7.0 | 0.5 | 1.049 | 0.049 |
| 3.0      | 9  | 0       |       |       |      |     |     |     |       |       |
| 3.0      | 15 | 3       | 605.4 | 43.5  | 40.2 | 1.3 | 7.7 | 0.3 | 0.936 | 0.077 |
| 3.0      | 17 | 3       | 723.2 | 271.1 | 41.7 | 5.5 | 7.3 | 1.5 | 0.966 | 0.098 |
| 31       | 5  | 2       | 526.7 | 115.2 | 40.0 | 2.8 | 7.8 | 0.4 | 0.816 | 0.007 |
| 31       | 8  | 3       | 714.2 | 117.7 | 43.0 | 2.0 | 8.0 | 0.5 | 0.893 | 0.046 |
| 31       | 12 | 3       | 614.5 | 166.5 | 40.7 | 2.5 | 7.3 | 0.6 | 0.896 | 0.088 |
| 31       | 20 | 3       | 585.9 | 124.7 | 38.7 | 2.1 | 6.7 | 0.3 | 1.004 | 0.103 |
| 322      | 2  | 3       | 783.8 | 125.2 | 43.2 | 2.0 | 7.3 | 0.6 | 0.969 | 0.019 |
| 322      | 6  | 3       | 592.6 | 123.6 | 38.8 | 3.2 | 6.5 | 0.5 | 1.009 | 0.127 |
| 322      | 14 | 3       | 557.4 | 97.7  | 39.3 | 2.3 | 7.3 | 0.8 | 0.912 | 0.069 |
| 322      | 18 | 3       | 605.7 | 230.1 | 40.0 | 4.4 | 7.5 | 0.5 | 0.910 | 0.098 |

Table S9. Raw data for percent mature fish over time in each tank during the life cycle exposure of fathead minnows to metformin. Fish were assessed every 2-3 weeks at the indicated day post-hatch (dph). Mean number of females per tank over time is shown in the last column.

|      |                  | day post-hatch (dph) |                 |       |                  |
|------|------------------|----------------------|-----------------|-------|------------------|
| Tank | Metformin (µg/L) | 64                   | 64 (after cull) | 78    | 78 (after cull)  |
| 1    | Controls         | 0.0                  | 0.0             | 13.3  | 16.7             |
| 3    | Controls         | 5.3                  | 6.7             | 13.3  | 16.7             |
| 7    | Controls         | 0.0                  | 0.0             | 26.7  | 33.3             |
| 10   | Controls         | 5.0                  | 6.7             | 13.3  | 16.7             |
| 11   | Controls         | 0.0                  | 0.0             | 6.7   | 8.3              |
| 13   | Controls         | 4.5                  | 6.7             | 6.7   | 8.3              |
| 16   | Controls         | 0.0                  | 0.0             | 0.0   | 0.0              |
| 19   | Controls         | 0.0                  | 0.0             | 6.7   | 8.3              |
| 4    | 3.0              | 5.0                  | 6.7             | 13.3  | 16.7             |
| 9    | 3.0              | 0.0                  | 0.0             | 12.5  | 12.5             |
| 15   | 3.0              | 0.0                  | 0.0             | 46.7  | 58.3             |
| 17   | 3.0              | 5.0                  | 6.7             | 20.0  | 25.0             |
| 5    | 31               | 0.0                  | 0.0             | 7.1   | 8.3              |
| 8    | 31               | 0.0                  | 0.0             | 13.3  | 16.7             |
| 12   | 31               | 0.0                  | 0.0             | 6.7   | 8.3              |
| 20   | 31               | 0.0                  | 0.0             | 13.3  | 16.7             |
| 2    | 322              | 5.0                  | 6.7             | 0.0   | 0.0              |
| 6    | 322              | 5.3                  | 6.7             | 6.7   | 8.3              |
| 14   | 322              | 5.0                  | 6.7             | 13.3  | 16.7             |
| 18   | 322              | 5.0                  | 6.7             | 13.3  | 16.7             |
|      |                  |                      |                 |       |                  |
|      |                  | day post-hatch (dph) |                 |       |                  |
| Tank | Metformin (µg/L) | 92                   | 92 (after cull) | 106   | 106 (after cull) |
| 1    | Controls         | 50.0                 | 60.0            | 80.0  | 77.8             |
| 3    | Controls         | 33.3                 | 40.0            | 70.0  | 66.7             |
| 7    | Controls         | 50.0                 | 60.0            | 90.0  | 88.9             |
| 10   | Controls         | 50.0                 | 60.0            | 60.0  | 55.6             |
| 11   | Controls         | 50.0                 | 60.0            | 90.0  | 88.9             |
| 13   | Controls         | 58.3                 | 70.0            | 90.0  | 88.9             |
| 16   | Controls         | 41.7                 | 50.0            | 60.0  | 60.0             |
| 19   | Controls         | 58.3                 | 70.0            | 100.0 | 100.0            |
| 4    | 3.0              | 66.7                 | 80.0            | 100.0 | 100.0            |

|      |                                  |                      |                  |       |                     |
|------|----------------------------------|----------------------|------------------|-------|---------------------|
| 9    | 3.0                              | 75.0                 | 75.0             | 75.0  | 75.0                |
| 15   | 3.0                              | 66.7                 | 80.0             | 100.0 | 100.0               |
| 17   | 3.0                              | 58.3                 | 70.0             | 80.0  | 75.0                |
| 5    | 31                               | 58.3                 | 70.0             | 80.0  | 75.0                |
| 8    | 31                               | 25.0                 | 30.0             | 80.0  | 80.0                |
| 12   | 31                               | 66.7                 | 80.0             | 100.0 | 100.0               |
| 20   | 31                               | 25.0                 | 30.0             | 60.0  | 55.6                |
| 2    | 322                              | 41.7                 | 50.0             | 60.0  | 55.6                |
| 6    | 322                              | 25.0                 | 30.0             | 70.0  | 70.0                |
| 14   | 322                              | 33.3                 | 40.0             | 30.0  | 30.0                |
| 18   | 322                              | 58.3                 | 70.0             | 90.0  | 90.0                |
|      |                                  |                      |                  |       |                     |
|      |                                  | day post-hatch (dph) |                  |       |                     |
| Tank | Metformin<br>( $\mu\text{g/L}$ ) | 120                  | 120 (after cull) | 141   | 141 (after<br>cull) |
| 1    | Controls                         | 77.8                 | 75.0             | 100.0 | 100.0               |
| 3    | Controls                         | 80.0                 | 87.5             | 87.5  | 85.7                |
| 7    | Controls                         | 100.0                | 100.0            | 100.0 | 100.0               |
| 10   | Controls                         | 60.0                 | 66.7             | 88.9  | 85.7                |
| 11   | Controls                         | 90.0                 | 100.0            | 100.0 | 100.0               |
| 13   | Controls                         | 100.0                | 100.0            | 100.0 | 100.0               |
| 16   | Controls                         | 70.0                 | 66.7             | 88.9  | 85.7                |
| 19   | Controls                         | 100.0                | 100.0            | 100.0 | 100.0               |
| 4    | 3.0                              | 100.0                | 100.0            | 100.0 | 100.0               |
| 9    | 3.0                              | 87.5                 | 85.7             | 85.7  | 85.7                |
| 15   | 3.0                              | 100.0                | 100.0            | 100.0 | 100.0               |
| 17   | 3.0                              | 66.7                 | 77.8             | 100.0 | 100.0               |
| 5    | 31                               | 80.0                 | 100.0            | 100.0 | 100.0               |
| 8    | 31                               | 100.0                | 100.0            | 100.0 | 100.0               |
| 12   | 31                               | 100.0                | 100.0            | 100.0 | 100.0               |
| 20   | 31                               | 70.0                 | 75.0             | 87.5  | 85.7                |
| 2    | 322                              | 70.0                 | 75.0             | 87.5  | 83.3                |
| 6    | 322                              | 90.0                 | 87.5             | 100.0 | 100.0               |
| 14   | 322                              | 63.6                 | 66.7             | 77.8  | 71.4                |
| 18   | 322                              | 100.0                | 100.0            | 100.0 | 100.0               |
|      |                                  |                      |                  |       |                     |
|      |                                  |                      |                  |       |                     |
|      |                                  |                      |                  |       |                     |
|      |                                  |                      |                  |       |                     |
|      |                                  |                      |                  |       |                     |

| Tank | Metformin<br>( $\mu\text{g/L}$ ) | day post-hatch (dph) |                                    |  |  |
|------|----------------------------------|----------------------|------------------------------------|--|--|
|      |                                  | 172                  | Mean number of<br>females per tank |  |  |
| 1    | Controls                         | 100.0                | 2.87                               |  |  |
| 3    | Controls                         | 71.4                 | 2.14                               |  |  |
| 7    | Controls                         | 100.0                | 3.91                               |  |  |
| 10   | Controls                         | 100.0                | 2.53                               |  |  |
| 11   | Controls                         | 100.0                | 4.47                               |  |  |
| 13   | Controls                         | 100.0                | 5.16                               |  |  |
| 16   | Controls                         | 100.0                | 2.87                               |  |  |
| 19   | Controls                         | 100.0                | 5.49                               |  |  |
| 4    | 3.0                              | 100.0                | 5.16                               |  |  |
| 9    | 3.0                              | 85.7                 | 2.89                               |  |  |
| 15   | 3.0                              | 100.0                | 5.00                               |  |  |
| 17   | 3.0                              | 100.0                | 3.53                               |  |  |
| 5    | 31                               | 100.0                | 4.10                               |  |  |
| 8    | 31                               | 100.0                | 5.53                               |  |  |
| 12   | 31                               | 100.0                | 5.14                               |  |  |
| 20   | 31                               | 85.7                 | 2.51                               |  |  |
| 2    | 322                              | 83.3                 | 1.91                               |  |  |
| 6    | 322                              | 100.0                | 3.87                               |  |  |
| 14   | 322                              | 71.4                 | 1.82                               |  |  |
| 18   | 322                              | 100.0                | 5.22                               |  |  |





| Metformin (µg/L) | Tank | n    | Tubercle index | Liver-somatic index | Gonadosomatic index | Carcass weight (g) |  |
|------------------|------|------|----------------|---------------------|---------------------|--------------------|--|
| Controls         | 1    | 3    | 2.40           | 1.82                | 1.41                | 3.03               |  |
| Controls         | 3    | 4    | 1.65           | 2.38                | 1.47                | 2.99               |  |
| Controls         | 7    | 3    | 0.20           | 1.90                | 1.05                | 2.70               |  |
| Controls         | 10   | 4    | 1.03           | 3.17                | 1.38                | 2.93               |  |
| Controls         | 11   | 3    | 1.57           | 2.07                | 1.18                | 2.57               |  |
| Controls         | 13   | 3    | 1.83           | 2.68                | 1.12                | 2.29               |  |
| Controls         | 16   | 4    | 0.33           | 2.89                | 1.31                | 2.81               |  |
| Controls         | 19   | 3    | 0.80           | 2.93                | 1.44                | 2.18               |  |
|                  | Mean | Mean | 1.23           | 2.48                | 1.29                | 2.69               |  |
|                  | s.d. | s.d. | 0.77           | 0.51                | 0.16                | 0.32               |  |
|                  |      |      |                |                     |                     |                    |  |
| 3.0              | 4    | 3    | 0.37           | 2.69                | 1.37                | 2.55               |  |
| 3.0              | 9    | 3    | 2.30           | 2.20                | 1.05                | 2.66               |  |
| 3.0              | 15   | 3    | 0.17           | 2.63                | 1.02                | 2.40               |  |
| 3.0              | 17   | 3    | 1.17           | 2.03                | 0.99                | 2.62               |  |
|                  | Mean | Mean | 1.00           | 2.39                | 1.11                | 2.56               |  |
|                  | s.d. | s.d. | 0.97           | 0.32                | 0.17                | 0.12               |  |
|                  |      |      |                |                     |                     |                    |  |
| 31               | 5    | 3    | 1.40           | 2.91                | 1.62                | 2.75               |  |
| 31               | 8    | 3    | 3.43           | 1.92                | 1.34                | 2.31               |  |
| 31               | 12   | 3    | 3.03           | 3.26                | 1.16                | 3.33               |  |
| 31               | 20   | 3    | 1.83           | 3.41                | 1.40                | 3.26               |  |
|                  | Mean | Mean | 2.43           | 2.87                | 1.38                | 2.92               |  |
|                  | s.d. | s.d. | 0.96           | 0.67                | 0.19                | 0.48               |  |
|                  |      |      |                |                     |                     |                    |  |
| 322              | 2    | 3    | 1.83           | 2.47                | 1.39                | 2.72               |  |
| 322              | 6    | 3    | 0.87           | 2.49                | 1.06                | 2.51               |  |
| 322              | 14   | 3    | 2.60           | 1.63                | 0.94                | 3.19               |  |
| 322              | 18   | 3    | 1.07           | 2.20                | 1.04                | 2.03               |  |
|                  | Mean | Mean | 1.59           | 2.20                | 1.11                | 2.61               |  |
|                  | s.d. | s.d. | 0.79           | 0.40                | 0.20                | 0.48               |  |





| Metformin (µg/L) | Tank | n    | Ovipositor area (mm <sup>2</sup> ) | Liver-somatic index | Gonado-somatic index | Carcass weight (g) |  |
|------------------|------|------|------------------------------------|---------------------|----------------------|--------------------|--|
| Controls         | 1    | 3    | 1.47                               | 4.00                | 11.96                | 1.19               |  |
| Controls         | 3    | 1    | 1.47                               | 4.71                | 10.55                | 1.07               |  |
| Controls         | 7    | 3    | 1.22                               | 3.72                | 12.93                | 1.29               |  |
| Controls         | 10   | 3    | 1.10                               | 3.80                | 11.73                | 1.16               |  |
| Controls         | 11   | 4    | 1.05                               | 3.51                | 14.74                | 1.26               |  |
| Controls         | 13   | 4    | 1.25                               | 4.42                | 9.78                 | 1.06               |  |
| Controls         | 16   | 3    | 1.32                               | 3.23                | 15.44                | 1.33               |  |
| Controls         | 19   | 5    | 1.34                               | 3.13                | 19.79                | 1.40               |  |
|                  | Mean | Mean | 1.28                               | 3.82                | 13.37                | 1.22               |  |
|                  | s.d. | s.d. | 0.16                               | 0.55                | 3.23                 | 0.12               |  |
|                  |      |      |                                    |                     |                      |                    |  |
| 3.0              | 4    | 5    | 1.13                               | 3.51                | 15.94                | 1.12               |  |
| 3.0              | 9    | 3    | 1.46                               | 2.88                | 16.83                | 1.11               |  |
| 3.0              | 15   | 4    | 1.51                               | 3.72                | 14.69                | 1.04               |  |
| 3.0              | 17   | 3    | 1.69                               | 3.87                | 13.62                | 1.32               |  |
|                  | Mean | Mean | 1.45                               | 3.50                | 15.27                | 1.15               |  |
|                  | s.d. | s.d. | 0.23                               | 0.44                | 1.41                 | 0.12               |  |
|                  |      |      |                                    |                     |                      |                    |  |
| 31               | 5    | 5    | 1.17                               | 2.79                | 12.97                | 1.20               |  |
| 31               | 8    | 5    | 1.13                               | 4.08                | 13.61                | 1.07               |  |
| 31               | 12   | 5    | 1.21                               | 3.18                | 13.87                | 1.11               |  |
| 31               | 20   | 3    | 1.01                               | 3.61                | 13.11                | 1.34               |  |
|                  | Mean | Mean | 1.13                               | 3.41                | 13.39                | 1.18               |  |
|                  | s.d. | s.d. | 0.09                               | 0.56                | 0.42                 | 0.12               |  |
|                  |      |      |                                    |                     |                      |                    |  |
| 322              | 2    | 2    | 1.54                               | 3.59                | 18.20                | 0.99               |  |
| 322              | 6    | 4    | 1.57                               | 4.10                | 16.30                | 1.13               |  |
| 322              | 14   | 2    | 1.48                               | 3.86                | 16.97                | 1.12               |  |
| 322              | 18   | 5    | 1.34                               | 3.79                | 14.70                | 1.11               |  |
|                  | Mean | Mean | 1.48                               | 3.83                | 16.54                | 1.09               |  |
|                  | s.d. | s.d. | 0.10                               | 0.21                | 1.46                 | 0.07               |  |

Table S12. Reproductive summary of each tank during the life cycle exposure of fathead minnows to metformin. Time to first breeding, total eggs per tank, and eggs per female is shown.

| Metformin (µg/L) | Tank | Day of first egg production (dph) | Average # of females/tank | Total # of eggs/tank | Eggs per female |
|------------------|------|-----------------------------------|---------------------------|----------------------|-----------------|
| Controls         | 1    | 99                                | 2.9                       | 5529                 | 1924            |
| Controls         | 3    | 89                                | 2.1                       | 3594                 | 1680            |
| Controls         | 7    | 89                                | 3.9                       | 9262                 | 2368            |
| Controls         | 10   | 95                                | 2.5                       | 5052                 | 1996            |
| Controls         | 11   | 106                               | 4.5                       | 12043                | 2695            |
| Controls         | 13   | 96                                | 5.2                       | 18672                | 3615            |
| Controls         | 16   | 97                                | 2.9                       | 6759                 | 2352            |
| Controls         | 19   | 99                                | 5.5                       | 14755                | 2686            |
|                  | Ave  |                                   | <b>3.7</b>                | <b>9458</b>          | <b>2415</b>     |
|                  | s.d. |                                   | 1.3                       | 5294                 | 604             |
|                  |      |                                   |                           |                      |                 |
| 3.0              | 4    | 107                               | 5.2                       | 10012                | 1939            |
| 3.0              | 9    | 103                               | 2.9                       | 8852                 | 3067            |
| 3.0              | 15   | 93                                | 5.0                       | 18343                | 3669            |
| 3.0              | 17   | 99                                | 3.5                       | 9288                 | 2630            |
|                  | Ave  |                                   | <b>4.1</b>                | <b>11624</b>         | <b>2826</b>     |
|                  | s.d. |                                   | 1.1                       | 4505                 | 729             |
|                  |      |                                   |                           |                      |                 |
| 31               | 5    | 110                               | 4.1                       | 5792                 | 1412            |
| 31               | 8    | 104                               | 5.5                       | 15144                | 2738            |
| 31               | 12   | 103                               | 5.1                       | 13341                | 2596            |
| 31               | 20   | 108                               | 2.5                       | 4557                 | 1818            |
|                  | Ave  |                                   | <b>4.3</b>                | <b>9709</b>          | <b>2141</b>     |
|                  | s.d. |                                   | 1.4                       | 5311                 | 632             |
|                  |      |                                   |                           |                      |                 |
| 322              | 2    | 107                               | 1.9                       | 1205                 | 630             |
| 322              | 6    | 100                               | 3.9                       | 9868                 | 2548            |
| 322              | 14   | 120                               | 1.8                       | 2617                 | 1436            |
| 322              | 18   | 94                                | 5.2                       | 18090                | 3469            |
|                  | Ave  |                                   | <b>3.2</b>                | <b>7945</b>          | <b>2021</b>     |
|                  | s.d. |                                   | 1.6                       | 7755                 | 1245            |

Table S13. Table of egg quality for each tank during the life cycle exposure of fathead minnows to metformin. Time to first breeding, total eggs per tank, and eggs per female is shown.

| Tank | Metformin (µg/L) | Clutch size (eggs/clutch) | Mean # clutches                     | Total # normal eggs                       | Total # unfertilized eggs | Total # dead eggs     | Total # mutant eggs         |
|------|------------------|---------------------------|-------------------------------------|-------------------------------------------|---------------------------|-----------------------|-----------------------------|
| 1    | Controls         | 178                       | 31                                  | 3478                                      | 399                       | 536                   | 825                         |
| 3    | Controls         | 178                       | 20                                  | 1924                                      | 51                        | 481                   | 533                         |
| 7    | Controls         | 166                       | 55                                  | 6831                                      | 228                       | 670                   | 1218                        |
| 10   | Controls         | 160                       | 31                                  | 3751                                      | 154                       | 392                   | 352                         |
| 11   | Controls         | 218                       | 55                                  | 8521                                      | 694                       | 885                   | 1289                        |
| 13   | Controls         | 327                       | 57                                  | 13366                                     | 540                       | 1325                  | 2312                        |
| 16   | Controls         | 192                       | 35                                  | 4252                                      | 355                       | 361                   | 1636                        |
| 19   | Controls         | 305                       | 48                                  | 9818                                      | 1330                      | 1592                  | 1306                        |
| 4    | 3.0              | 180                       | 55                                  | 7499                                      | 761                       | 528                   | 911                         |
| 9    | 3.0              | 191                       | 46                                  | 6395                                      | 1006                      | 429                   | 696                         |
| 15   | 3.0              | 247                       | 74                                  | 13598                                     | 603                       | 1113                  | 1969                        |
| 17   | 3.0              | 265                       | 35                                  | 6559                                      | 620                       | 412                   | 1176                        |
| 5    | 31               | 162                       | 35                                  | 4274                                      | 234                       | 407                   | 655                         |
| 8    | 31               | 268                       | 56                                  | 10863                                     | 923                       | 1081                  | 1859                        |
| 12   | 31               | 282                       | 47                                  | 9997                                      | 365                       | 790                   | 1796                        |
| 20   | 31               | 174                       | 26                                  | 3359                                      | 104                       | 265                   | 701                         |
| 2    | 322              | 146                       | 8                                   | 764                                       | 55                        | 73                    | 199                         |
| 6    | 322              | 200                       | 49                                  | 6941                                      | 1178                      | 707                   | 810                         |
| 14   | 322              | 200                       | 13                                  | 2131                                      | 30                        | 133                   | 286                         |
| 18   | 322              | 285                       | 63                                  | 13430                                     | 436                       | 876                   | 2315                        |
|      |                  |                           |                                     |                                           |                           |                       |                             |
| Tank | Metformin (µg/L) | Total # eggs laid         | Total # eggs broken during handling | Total # eggs into egg cup to assess hatch | Total # egg cups per tank | Average % normal eggs | Average % unfertilized eggs |
| 1    | Controls         | 5508                      | 290                                 | 1487                                      | 17                        | 68                    | 9                           |
| 3    | Controls         | 3560                      | 601                                 | 1257                                      | 14                        | 62                    | 2                           |
| 7    | Controls         | 9116                      | 297                                 | 2655                                      | 30                        | 75                    | 4                           |
| 10   | Controls         | 4970                      | 393                                 | 1865                                      | 20                        | 75                    | 5                           |
| 11   | Controls         | 11993                     | 648                                 | 2573                                      | 27                        | 67                    | 8                           |
| 13   | Controls         | 18636                     | 1119                                | 3448                                      | 36                        | 77                    | 3                           |
| 16   | Controls         | 6711                      | 148                                 | 1597                                      | 18                        | 69                    | 4                           |
| 19   | Controls         | 14625                     | 692                                 | 2856                                      | 29                        | 65                    | 17                          |
| 4    | 3.0              | 9878                      | 301                                 | 2375                                      | 24                        | 77                    | 7                           |
| 9    | 3.0              | 8801                      | 321                                 | 2313                                      | 25                        | 76                    | 12                          |
| 15   | 3.0              | 18283                     | 1053                                | 4134                                      | 43                        | 77                    | 5                           |
| 17   | 3.0              | 9271                      | 520                                 | 1873                                      | 19                        | 77                    | 7                           |

| 5    | 31                  | 5685                   | 218                      | 1737                   | 19                              | 79                      | 4                      |
|------|---------------------|------------------------|--------------------------|------------------------|---------------------------------|-------------------------|------------------------|
| 8    | 31                  | 14998                  | 410                      | 3536                   | 37                              | 73                      | 8                      |
| 12   | 31                  | 13277                  | 392                      | 2700                   | 27                              | 74                      | 7                      |
| 20   | 31                  | 4533                   | 128                      | 1119                   | 12                              | 71                      | 2                      |
| 2    | 322                 | 1167                   | 108                      | 502                    | 6                               | 74                      | 6                      |
| 6    | 322                 | 9813                   | 223                      | 2134                   | 23                              | 65                      | 17                     |
| 14   | 322                 | 2605                   | 36                       | 878                    | 9                               | 79                      | 1                      |
| 18   | 322                 | 17986                  | 1030                     | 4046                   | 42                              | 78                      | 3                      |
|      |                     |                        |                          |                        |                                 |                         |                        |
| Tank | Metformin<br>(µg/L) | Average %<br>dead eggs | Average %<br>mutant eggs | Total % normal<br>eggs | Total %<br>unfertilized<br>eggs | Total %<br>dead<br>eggs | Total %<br>mutant eggs |
| 1    | Controls            | 10                     | 13                       | 67                     | 8                               | 10                      | 16                     |
| 3    | Controls            | 14                     | 22                       | 65                     | 2                               | 16                      | 18                     |
| 7    | Controls            | 7                      | 14                       | 77                     | 3                               | 8                       | 14                     |
| 10   | Controls            | 11                     | 9                        | 82                     | 3                               | 9                       | 8                      |
| 11   | Controls            | 10                     | 15                       | 75                     | 6                               | 8                       | 11                     |
| 13   | Controls            | 7                      | 13                       | 76                     | 3                               | 8                       | 13                     |
| 16   | Controls            | 4                      | 24                       | 65                     | 5                               | 6                       | 25                     |
| 19   | Controls            | 7                      | 10                       | 70                     | 10                              | 11                      | 9                      |
| 4    | 3.0                 | 5                      | 10                       | 78                     | 8                               | 6                       | 10                     |
| 9    | 3.0                 | 5                      | 7                        | 75                     | 12                              | 5                       | 8                      |
| 15   | 3.0                 | 6                      | 13                       | 79                     | 4                               | 6                       | 11                     |
| 17   | 3.0                 | 4                      | 12                       | 75                     | 7                               | 5                       | 13                     |
| 5    | 31                  | 6                      | 10                       | 78                     | 4                               | 7                       | 12                     |
| 8    | 31                  | 7                      | 12                       | 74                     | 6                               | 7                       | 13                     |
| 12   | 31                  | 7                      | 12                       | 78                     | 3                               | 6                       | 14                     |
| 20   | 31                  | 10                     | 18                       | 76                     | 2                               | 6                       | 16                     |
| 2    | 322                 | 6                      | 14                       | 72                     | 5                               | 7                       | 19                     |
| 6    | 322                 | 9                      | 10                       | 72                     | 12                              | 7                       | 8                      |
| 14   | 322                 | 5                      | 15                       | 83                     | 1                               | 5                       | 11                     |
| 18   | 322                 | 5                      | 15                       | 79                     | 3                               | 5                       | 14                     |

Table S14. Hatch success of F1 offspring from parent fathead minnows exposed to metformin for a life cycle.

| Metformin (µg/L) | Tank        | % Hatchability | % Hatch success | % Severely deformed | % Mild-moderate deformed | Time to hatch (days) |
|------------------|-------------|----------------|-----------------|---------------------|--------------------------|----------------------|
| Controls         | 1           | 95.9           | 93.7            | 2.1                 | 2.4                      | 5.1                  |
| Controls         | 3           | 97.8           | 95.7            | 2.1                 | 2.1                      | 5.4                  |
| Controls         | 7           | 96.2           | 94.3            | 1.9                 | 2.0                      | 5.0                  |
| Controls         | 10          | 97.0           | 96.0            | 1.0                 | 1.0                      | 5.4                  |
| Controls         | 11          | 95.3           | 92.2            | 3.0                 | 4.2                      | 5.1                  |
| Controls         | 13          | 97.1           | 95.7            | 1.2                 | 1.4                      | 5.3                  |
| Controls         | 16          | 94.9           | 91.9            | 3.2                 | 3.7                      | 5.1                  |
| Controls         | 19          | 97.3           | 93.1            | 4.3                 | 6.3                      | 5.4                  |
|                  | <b>Mean</b> | <b>96.4</b>    | <b>94.1</b>     | <b>2.3</b>          | <b>2.9</b>               | <b>5.2</b>           |
|                  | <b>s.d.</b> | <b>1.0</b>     | <b>1.6</b>      | <b>1.1</b>          | <b>1.7</b>               | <b>0.2</b>           |
|                  |             |                |                 |                     |                          |                      |
| 3.0              | 4           | 98.4           | 95.1            | 3.3                 | 4.1                      | 5.1                  |
| 3.0              | 9           | 97.9           | 90.9            | 7.0                 | 8.8                      | 5.2                  |
| 3.0              | 15          | 97.9           | 97.2            | 0.6                 | 0.6                      | 5.1                  |
| 3.0              | 17          | 95.2           | 92.4            | 2.6                 | 3.3                      | 5.1                  |
|                  | <b>Mean</b> | <b>97.4</b>    | <b>93.9</b>     | <b>3.4</b>          | <b>4.2</b>               | <b>5.1</b>           |
|                  | <b>s.d.</b> | <b>1.5</b>     | <b>2.8</b>      | <b>2.7</b>          | <b>3.4</b>               | <b>0.1</b>           |
|                  |             |                |                 |                     |                          |                      |
| 31               | 5           | 97.6           | 95.4            | 2.0                 | 2.1                      | 5.3                  |
| 31               | 8           | 94.8           | 89.3            | 5.9                 | 8.5                      | 5.1                  |
| 31               | 12          | 95.5           | 92.7            | 3.0                 | 3.6                      | 5.4                  |
| 31               | 20          | 95.9           | 92.8            | 3.2                 | 3.6                      | 5.0                  |
|                  | <b>Mean</b> | <b>96.0</b>    | <b>92.5</b>     | <b>3.5</b>          | <b>4.4</b>               | <b>5.2</b>           |
|                  | <b>s.d.</b> | <b>1.2</b>     | <b>2.5</b>      | <b>1.7</b>          | <b>2.8</b>               | <b>0.2</b>           |
|                  |             |                |                 |                     |                          |                      |
| 322              | 2           | 90.3           | 88.5            | 1.7                 | 1.8                      | 5.2                  |
| 322              | 6           | 93.1           | 89.2            | 4.3                 | 6.1                      | 5.4                  |
| 322              | 14          | 95.5           | 93.1            | 2.3                 | 2.4                      | 4.9                  |
| 322              | 18          | 97.1           | 95.6            | 1.5                 | 1.5                      | 5.2                  |
|                  | <b>Mean</b> | <b>94.0</b>    | <b>91.6</b>     | <b>2.4</b>          | <b>3.0</b>               | <b>5.2</b>           |
|                  | <b>s.d.</b> | <b>3.0</b>     | <b>3.3</b>      | <b>1.3</b>          | <b>2.1</b>               | <b>0.2</b>           |

Table S15. Survival and growth of F1 larvae from parent fathead minnows exposed to metformin for a life cycle.

| Metformin (µg/L) | Tank | N | Survival from hatch to 9 dph (%) | Mean wet weight (mg) | Mean total length (mm) | Mean condition factor | Mean tail length (mm) |
|------------------|------|---|----------------------------------|----------------------|------------------------|-----------------------|-----------------------|
| Controls         | 1    | 4 | 97.5                             | 5.75                 | 10.02                  | 0.566                 | 1.22                  |
| Controls         | 3    | 3 | 90.0                             | 3.76                 | 9.13                   | 0.486                 | 1.00                  |
| Controls         | 7    | 4 | 92.5                             | 3.31                 | 8.60                   | 0.478                 | 0.98                  |
| Controls         | 10   | 4 | 90.0                             | 3.96                 | 9.02                   | 0.537                 | 1.00                  |
| Controls         | 11   | 4 | 100.0                            | 3.77                 | 8.91                   | 0.512                 | 1.00                  |
| Controls         | 13   | 4 | 97.5                             | 4.63                 | 9.46                   | 0.532                 | 1.07                  |
| Controls         | 16   | 4 | 100.0                            | 4.56                 | 9.63                   | 0.507                 | 1.10                  |
| Controls         | 19   | 4 | 100.0                            | 4.53                 | 9.57                   | 0.501                 | 1.06                  |
|                  | Mean |   | 95.9                             | 4.28                 | 9.29                   | 0.515                 | 1.06                  |
|                  | s.d. |   | 4.4                              | 0.76                 | 0.46                   | 0.029                 | 0.08                  |
|                  |      |   |                                  |                      |                        |                       |                       |
| 3.0              | 4    | 4 | 95.0                             | 4.24                 | 9.59                   | 0.478                 | 1.14                  |
| 3.0              | 9    | 4 | 97.5                             | 4.74                 | 9.71                   | 0.505                 | 1.06                  |
| 3.0              | 15   | 4 | 100.0                            | 4.49                 | 9.32                   | 0.545                 | 1.09                  |
| 3.0              | 17   | 4 | 97.5                             | 4.28                 | 9.20                   | 0.536                 | 1.06                  |
|                  | Mean |   | 97.5                             | 4.44                 | 9.45                   | 0.516                 | 1.09                  |
|                  | s.d. |   | 2.0                              | 0.23                 | 0.24                   | 0.031                 | 0.03                  |
|                  |      |   |                                  |                      |                        |                       |                       |
| 31               | 5    | 4 | 97.5                             | 4.54                 | 9.48                   | 0.533                 | 1.08                  |
| 31               | 8    | 4 | 97.5                             | 5.58                 | 10.01                  | 0.549                 | 1.24                  |
| 31               | 12   | 4 | 97.5                             | 4.49                 | 9.36                   | 0.540                 | 1.05                  |
| 31               | 20   | 4 | 97.5                             | 3.92                 | 9.28                   | 0.488                 | 0.97                  |
|                  | Mean |   | 97.5                             | 4.63                 | 9.53                   | 0.527                 | 1.09                  |
|                  | s.d. |   | 0.0                              | 0.69                 | 0.33                   | 0.027                 | 0.11                  |
|                  |      |   |                                  |                      |                        |                       |                       |
| 322              | 2    | 4 | 97.5                             | 4.77                 | 9.82                   | 0.487                 | 1.23                  |
| 322              | 6    | 4 | 95.0                             | 3.75                 | 9.19                   | 0.487                 | 1.01                  |
| 322              | 14   | 4 | 95.0                             | 3.83                 | 9.06                   | 0.494                 | 0.97                  |
| 322              | 18   | 4 | 97.5                             | 3.70                 | 9.02                   | 0.500                 | 0.97                  |
|                  | Mean |   | 96.3                             | 4.01                 | 9.27                   | 0.492                 | 1.04                  |
|                  | s.d. |   | 1.4                              | 0.51                 | 0.37                   | 0.006                 | 0.13                  |
|                  |      |   |                                  |                      |                        |                       |                       |
| Metformin (µg/L) | Tank | n | Survival from 9 to 16 dph (%)    | Mean wet weight (mg) | Mean total length (mm) | Mean condition factor | Mean tail length (mm) |
| Controls         | 1    | 4 | 100.0                            | 19.60                | 13.62                  | 0.770                 | 2.43                  |
| Controls         | 3    | 3 | 93.3                             | 14.63                | 12.70                  | 0.670                 | 2.17                  |
| Controls         | 7    | 4 | 100.0                            | 16.57                | 13.06                  | 0.720                 | 2.12                  |
| Controls         | 10   | 4 | 100.0                            | 12.35                | 12.24                  | 0.664                 | 2.04                  |
| Controls         | 11   | 4 | 95.0                             | 14.09                | 12.61                  | 0.691                 | 2.07                  |

|          |      |   |       |       |       |       |      |
|----------|------|---|-------|-------|-------|-------|------|
| Controls | 13   | 4 | 100.0 | 14.39 | 12.65 | 0.706 | 2.17 |
| Controls | 16   | 4 | 100.0 | 16.39 | 13.17 | 0.706 | 2.18 |
| Controls | 19   | 4 | 100.0 | 17.53 | 13.75 | 0.669 | 2.25 |
|          | Mean |   | 98.5  | 15.69 | 12.98 | 0.699 | 2.18 |
|          | s.d. |   | 2.7   | 2.28  | 0.52  | 0.035 | 0.12 |
|          |      |   |       |       |       |       |      |
| 3.0      | 4    | 4 | 97.5  | 15.21 | 12.94 | 0.699 | 2.23 |
| 3.0      | 9    | 4 | 100.0 | 16.97 | 13.47 | 0.691 | 2.27 |
| 3.0      | 15   | 4 | 100.0 | 15.05 | 12.86 | 0.705 | 2.20 |
| 3.0      | 17   | 4 | 100.0 | 14.63 | 12.59 | 0.728 | 2.15 |
|          | Mean |   | 99.4  | 15.46 | 12.97 | 0.706 | 2.21 |
|          | s.d. |   | 1.3   | 1.03  | 0.37  | 0.016 | 0.05 |
|          |      |   |       |       |       |       |      |
| 31       | 5    | 4 | 100.0 | 14.20 | 12.85 | 0.663 | 2.19 |
| 31       | 8    | 4 | 100.0 | 18.01 | 13.86 | 0.671 | 2.43 |
| 31       | 12   | 4 | 95.0  | 15.82 | 13.15 | 0.693 | 2.28 |
| 31       | 20   | 4 | 100.0 | 13.24 | 12.54 | 0.669 | 2.06 |
|          | Mean |   | 98.8  | 15.32 | 13.10 | 0.674 | 2.24 |
|          | s.d. |   | 2.5   | 2.09  | 0.56  | 0.013 | 0.15 |
|          |      |   |       |       |       |       |      |
| 322      | 2    | 4 | 100.0 | 15.54 | 13.13 | 0.683 | 2.26 |
| 322      | 6    | 4 | 100.0 | 12.18 | 12.23 | 0.660 | 2.03 |
| 322      | 14   | 4 | 95.0  | 15.43 | 12.94 | 0.702 | 2.14 |
| 322      | 18   | 4 | 100.0 | 12.83 | 12.35 | 0.676 | 2.05 |
|          | Mean |   | 98.8  | 13.99 | 12.66 | 0.680 | 2.12 |
|          | s.d. |   | 2.5   | 1.74  | 0.44  | 0.017 | 0.10 |



Table S16. Vitellogenin in mature male and female fish at the end of the life cycle exposure of fathead minnows to metformin. Note different units for VTG in males (ng/mL) and in females ( $\mu\text{g/mL}$ ). Some fish are missing as a blood sample was not obtainable or the capillary tube shattered on centrifugation. n is the number of fish in each tank in which plasma VTG was measured.

| Sex  | Tank | Metformin ( $\mu\text{g/L}$ ) | Fish # | Plasma VTG (ng/mL) | Log plasma VTG (log ng/mL) | n |
|------|------|-------------------------------|--------|--------------------|----------------------------|---|
| Male | 1    | Controls                      | 1      | 1268               | 3.103119                   | 3 |
| Male | 1    | Controls                      | 3      | 822                | 2.914872                   |   |
| Male | 1    | Controls                      | 5      | 14284              | 4.15485                    |   |
| Male | 3    | Controls                      | 14     | 412                | 2.614897                   | 4 |
| Male | 3    | Controls                      | 15     | 802                | 2.904174                   |   |
| Male | 3    | Controls                      | 17     | 256                | 2.40824                    |   |
| Male | 3    | Controls                      | 19     | 2438               | 3.387034                   |   |
| Male | 7    | Controls                      | 43     | 1481               | 3.170555                   | 3 |
| Male | 7    | Controls                      | 45     | 124                | 2.093422                   |   |
| Male | 7    | Controls                      | 47     | 1961               | 3.292478                   |   |
| Male | 10   | Controls                      | 65     | 3411               | 3.532882                   | 4 |
| Male | 10   | Controls                      | 67     | 185                | 2.267172                   |   |
| Male | 10   | Controls                      | 68     | 313                | 2.495544                   |   |
| Male | 10   | Controls                      | 69     | 3459               | 3.538951                   |   |
| Male | 11   | Controls                      | 72     | 435                | 2.638489                   | 3 |
| Male | 11   | Controls                      | 74     | 810                | 2.908485                   |   |
| Male | 11   | Controls                      | 76     | 2329               | 3.367169                   |   |
| Male | 13   | Controls                      | 88     | 454                | 2.657056                   | 3 |
| Male | 13   | Controls                      | 90     | 470                | 2.672098                   |   |
| Male | 13   | Controls                      | 92     | 1714               | 3.234011                   |   |
| Male | 16   | Controls                      | 111    | 1261               | 3.100715                   | 4 |
| Male | 16   | Controls                      | 112    | 136                | 2.133539                   |   |
| Male | 16   | Controls                      | 114    | 5203               | 3.716254                   |   |
| Male | 16   | Controls                      | 116    | 935                | 2.970812                   |   |
| Male | 19   | Controls                      | 132    | 1401               | 3.146438                   | 2 |
| Male | 19   | Controls                      | 134    |                    |                            |   |
| Male | 19   | Controls                      | 136    | 19291              | 4.285355                   |   |
| Male | 4    | 3.0                           | 20     | 3887               | 3.589615                   | 2 |
| Male | 4    | 3.0                           | 22     |                    |                            |   |
| Male | 4    | 3.0                           | 24     | 565                | 2.752048                   |   |
| Male | 9    | 3.0                           | 58     | 203                | 2.307496                   | 3 |
| Male | 9    | 3.0                           | 60     | 222                | 2.346353                   |   |
| Male | 9    | 3.0                           | 62     | 659                | 2.818885                   |   |
| Male | 9    | 3.0                           | 64     |                    |                            |   |

|        |      |                                  |        |                                    |                                                 |   |
|--------|------|----------------------------------|--------|------------------------------------|-------------------------------------------------|---|
| Male   | 15   | 3.0                              | 102    | 164                                | 2.214844                                        | 3 |
| Male   | 15   | 3.0                              | 104    | 2351                               | 3.371253                                        |   |
| Male   | 15   | 3.0                              | 107    | 3231                               | 3.509337                                        |   |
| Male   | 17   | 3.0                              | 117    | 965                                | 2.984527                                        | 2 |
| Male   | 17   | 3.0                              | 119    |                                    |                                                 |   |
| Male   | 17   | 3.0                              | 121    | 543                                | 2.7348                                          |   |
| Male   | 5    | 31                               | 28     | 313                                | 2.495544                                        | 3 |
| Male   | 5    | 31                               | 30     | 1412                               | 3.149835                                        |   |
| Male   | 5    | 31                               | 32     | 1427                               | 3.154424                                        |   |
| Male   | 8    | 31                               | 50     | 32797                              | 4.515834                                        | 2 |
| Male   | 8    | 31                               | 52     |                                    |                                                 |   |
| Male   | 8    | 31                               | 54     | 2922                               | 3.46568                                         |   |
| Male   | 12   | 31                               | 80     | 393                                | 2.594393                                        | 3 |
| Male   | 12   | 31                               | 82     | 5976                               | 3.776411                                        |   |
| Male   | 12   | 31                               | 84     | 3456                               | 3.538574                                        |   |
| Male   | 20   | 31                               | 140    | 131                                | 2.117271                                        | 3 |
| Male   | 20   | 31                               | 142    | 2645                               | 3.422426                                        |   |
| Male   | 20   | 31                               | 144    | 1685                               | 3.2266                                          |   |
| Male   | 2    | 322                              | 7      | 4360                               | 3.639486                                        | 3 |
| Male   | 2    | 322                              | 9      | 1215                               | 3.084576                                        |   |
| Male   | 2    | 322                              | 11     | 1238                               | 3.092721                                        |   |
| Male   | 2    | 322                              | 12     |                                    |                                                 |   |
| Male   | 6    | 322                              | 36     | 7756                               | 3.889638                                        | 2 |
| Male   | 6    | 322                              | 38     |                                    |                                                 |   |
| Male   | 6    | 322                              | 40     | 568                                | 2.754348                                        |   |
| Male   | 14   | 322                              | 95     | 614                                | 2.788168                                        | 3 |
| Male   | 14   | 322                              | 96     |                                    |                                                 |   |
| Male   | 14   | 322                              | 97     | 79                                 | 1.897627                                        |   |
| Male   | 14   | 322                              | 98     |                                    |                                                 |   |
| Male   | 14   | 322                              | 100    | 1883                               | 3.27485                                         |   |
| Male   | 18   | 322                              | 124    | 3239                               | 3.510411                                        | 2 |
| Male   | 18   | 322                              | 126    |                                    |                                                 |   |
| Male   | 18   | 322                              | 128    | 14065                              | 4.14814                                         |   |
|        |      |                                  |        |                                    |                                                 |   |
| Sex    | Tank | Metformin<br>( $\mu\text{g/L}$ ) | Fish # | Plasma VTG<br>( $\mu\text{g/mL}$ ) | Log<br>plasma<br>VTG (log<br>$\mu\text{g/mL}$ ) | n |
| Female | 1    | Controls                         | 2      | 9597                               | 3.982135                                        | 3 |
| Female | 1    | Controls                         | 4      | 12354                              | 4.091808                                        |   |
| Female | 1    | Controls                         | 6      | 12189                              | 4.085968                                        |   |
| Female | 3    | Controls                         | 13     | 13073                              | 4.116375                                        | 1 |

|        |    |          |     |       |          |   |
|--------|----|----------|-----|-------|----------|---|
| Female | 3  | Controls | 16  |       |          |   |
| Female | 3  | Controls | 18  |       |          |   |
| Female | 7  | Controls | 44  | 22146 | 4.345295 | 3 |
| Female | 7  | Controls | 46  |       |          |   |
| Female | 7  | Controls | 48  | 13973 | 4.14529  |   |
| Female | 7  | Controls | 49  | 14891 | 4.172924 |   |
| Female | 10 | Controls | 66  | 14049 | 4.147645 | 3 |
| Female | 10 | Controls | 70  | 11866 | 4.074304 |   |
| Female | 10 | Controls | 71  | 11456 | 4.059033 |   |
| Female | 11 | Controls | 73  | 13519 | 4.130945 | 4 |
| Female | 11 | Controls | 75  | 16468 | 4.216641 |   |
| Female | 11 | Controls | 77  | 12572 | 4.099404 |   |
| Female | 11 | Controls | 78  | 9975  | 3.998913 |   |
| Female | 11 | Controls | 79  |       |          |   |
| Female | 13 | Controls | 89  | 8947  | 3.951677 | 3 |
| Female | 13 | Controls | 91  | 9963  | 3.99839  |   |
| Female | 13 | Controls | 93  |       |          |   |
| Female | 13 | Controls | 94  | 6152  | 3.789016 |   |
| Female | 16 | Controls | 110 | 14441 | 4.159597 | 2 |
| Female | 16 | Controls | 113 |       |          |   |
| Female | 16 | Controls | 115 | 13904 | 4.14314  |   |
| Female | 19 | Controls | 133 |       |          | 3 |
| Female | 19 | Controls | 135 |       |          |   |
| Female | 19 | Controls | 137 | 16735 | 4.223626 |   |
| Female | 19 | Controls | 138 | 17318 | 4.238498 |   |
| Female | 19 | Controls | 139 | 16262 | 4.211174 |   |
| Female | 4  | 3.0      | 21  |       |          | 3 |
| Female | 4  | 3.0      | 23  | 15092 | 4.178747 |   |
| Female | 4  | 3.0      | 25  | 13870 | 4.142076 |   |
| Female | 4  | 3.0      | 26  | 16735 | 4.223626 |   |
| Female | 4  | 3.0      | 27  |       |          |   |
| Female | 9  | 3.0      | 59  | 14050 | 4.147676 | 2 |
| Female | 9  | 3.0      | 61  | 14529 | 4.162236 |   |
| Female | 9  | 3.0      | 63  |       |          |   |
| Female | 15 | 3.0      | 103 | 9649  | 3.984482 | 3 |
| Female | 15 | 3.0      | 105 | 8176  | 3.912541 |   |
| Female | 15 | 3.0      | 106 |       |          |   |
| Female | 15 | 3.0      | 108 | 12621 | 4.101094 |   |
| Female | 15 | 3.0      | 109 |       |          |   |
| Female | 17 | 3.0      | 118 | 11661 | 4.066736 | 4 |
| Female | 17 | 3.0      | 120 | 14178 | 4.151615 |   |

|        |    |     |     |       |          |   |
|--------|----|-----|-----|-------|----------|---|
| Female | 17 | 3.0 | 122 | 11141 | 4.046924 |   |
| Female | 17 | 3.0 | 123 | 15352 | 4.186165 |   |
| Female | 5  | 31  | 29  | 8835  | 3.946207 | 5 |
| Female | 5  | 31  | 31  | 6860  | 3.836324 |   |
| Female | 5  | 31  | 33  | 11213 | 4.049722 |   |
| Female | 5  | 31  | 34  | 12500 | 4.09691  |   |
| Female | 5  | 31  | 35  | 10279 | 4.011951 |   |
| Female | 8  | 31  | 51  | 13116 | 4.117801 | 3 |
| Female | 8  | 31  | 53  | 10950 | 4.039414 |   |
| Female | 8  | 31  | 55  |       |          |   |
| Female | 8  | 31  | 56  | 14927 | 4.173973 |   |
| Female | 8  | 31  | 57  |       |          |   |
| Female | 12 | 31  | 81  | 17423 | 4.241123 | 3 |
| Female | 12 | 31  | 83  | 16747 | 4.223937 |   |
| Female | 12 | 31  | 85  | 13361 | 4.125839 |   |
| Female | 12 | 31  | 86  |       |          |   |
| Female | 12 | 31  | 87  |       |          |   |
| Female | 20 | 31  | 141 | 8570  | 3.932981 | 3 |
| Female | 20 | 31  | 143 | 14927 | 4.173973 |   |
| Female | 20 | 31  | 145 |       |          |   |
| Female | 20 | 31  | 146 | 10825 | 4.034428 |   |
| Female | 2  | 322 | 8   | 8484  | 3.928601 | 2 |
| Female | 2  | 322 | 10  | 16087 | 4.206475 |   |
| Female | 6  | 322 | 37  | 12183 | 4.085754 | 4 |
| Female | 6  | 322 | 39  | 11120 | 4.046105 |   |
| Female | 6  | 322 | 41  | 10388 | 4.016532 |   |
| Female | 6  | 322 | 42  | 16395 | 4.214711 |   |
| Female | 14 | 322 | 99  |       |          | 1 |
| Female | 14 | 322 | 101 | 12252 | 4.088207 |   |
| Female | 18 | 322 | 125 | 13099 | 4.117238 | 4 |
| Female | 18 | 322 | 127 | 13998 | 4.146066 |   |
| Female | 18 | 322 | 129 | 15850 | 4.200029 |   |
| Female | 18 | 322 | 130 | 15691 | 4.195651 |   |

Table S17a. Gonad histology data for mature male fish at the end of the life cycle exposure of fathead minnows to metformin.

| Sex     | Fish     | Tank | Metformin (µg/L) | Rep. | Teste Stage | # of Slides |
|---------|----------|------|------------------|------|-------------|-------------|
| Male    | 1        | 1    | Controls         | A    | 2           | 21          |
| Male    | 3        | 1    | Controls         | A    | 2           | 27          |
| Male    | 5        | 1    | Controls         | A    | 3           | 28          |
| Male    | 14       | 3    | Controls         | A    | 3           | 34          |
| Male    | 15       | 3    | Controls         | A    | 3           | 25          |
| Male    | 17       | 3    | Controls         | A    | 3           | 23          |
| Male    | 19       | 3    | Controls         | A    | 2           | 28          |
| ImmMale | (IMM) 16 | 3    | Controls         | A    | .           | .           |
| ImmMale | (IMM) 18 | 3    | Controls         | A    | 1           | 11          |
| Male    | 43       | 7    | Controls         | B    | 2           | 19          |
| Male    | 45       | 7    | Controls         | B    | 2           | 20          |
| Male    | 47       | 7    | Controls         | B    | 3           | 24          |
| Male    | 65       | 10   | Controls         | B    | 2           | 18          |
| Male    | 67       | 10   | Controls         | B    | 3           | 28          |
| Male    | 68       | 10   | Controls         | B    | 3           | 22          |
| Male    | 69       | 10   | Controls         | B    | 3           | 23          |
| Male    | 72       | 11   | Controls         | C    | 2           | 18          |
| Male    | 74       | 11   | Controls         | C    | 2           | 21          |
| Male    | 76       | 11   | Controls         | C    | 2           | 17          |
| Male    | 88       | 13   | Controls         | C    | 2           | 21          |
| Male    | 90       | 13   | Controls         | C    | 3           | 20          |
| Male    | 92       | 13   | Controls         | C    | 2           | 15          |
| Male    | 111      | 16   | Controls         | D    | 3           | 19          |
| Male    | 112      | 16   | Controls         | D    | 2           | 20          |
| Male    | 114      | 16   | Controls         | D    | 3           | 28          |
| Male    | 116      | 16   | Controls         | D    | 2           | 24          |
| Male    | 132      | 19   | Controls         | D    | 3           | 25          |
| Male    | 134      | 19   | Controls         | D    | 3           | 15          |
| Male    | 136      | 19   | Controls         | D    | 3           | 19          |
| Male    | 20       | 4    | 3.0              | A    | 2           | 22          |
| Male    | 22       | 4    | 3.0              | A    | 2           | 27          |
| Male    | 24       | 4    | 3.0              | A    | 3           | 28          |
| Male    | 58       | 9    | 3.0              | B    | 2           | 16          |
| Male    | 60       | 9    | 3.0              | B    | 2           | 25          |
| Male    | 62       | 9    | 3.0              | B    | 3           | 21          |
| ImmMale | (IMM) 64 | 9    | 3.0              | B    | 3           | 27          |
| Male    | 102      | 15   | 3.0              | C    | 2           | 16          |

|         |           |    |     |   |     |    |
|---------|-----------|----|-----|---|-----|----|
| Male    | 104       | 15 | 3.0 | C | 3   | 15 |
| Male    | 107       | 15 | 3.0 | C | 3   | 14 |
| Male    | 117       | 17 | 3.0 | D | 2   | 21 |
| Male    | 119       | 17 | 3.0 | D | 2   | 22 |
| Male    | 121       | 17 | 3.0 | D | 2   | 11 |
| Male    | 28        | 5  | 31  | A | 3   | 18 |
| Male    | 30        | 5  | 31  | A | 2   | 24 |
| Male    | 32        | 5  | 31  | A | 2   | 32 |
| Male    | 50        | 8  | 31  | B | 3   | 28 |
| Male    | 52        | 8  | 31  | B | 2   | 21 |
| Male    | 54        | 8  | 31  | B | 2   | 16 |
| Male    | 80        | 12 | 31  | C | 2   | 24 |
| Male    | 82        | 12 | 31  | C | 3   | 31 |
| Male    | 84        | 12 | 31  | C | 2   | 27 |
| Male    | 140       | 20 | 31  | D | 3   | 27 |
| Male    | 142       | 20 | 31  | D | 2   | 17 |
| Male    | 144       | 20 | 31  | D | 3   | 34 |
| ImmMale | (IMM) 145 | 20 | 31  | D | 2   | 15 |
| Male    | 7         | 2  | 322 | A | 3   | 21 |
| Male    | 9         | 2  | 322 | A | 2   | 28 |
| Male    | 11        | 2  | 322 | A | 3   | 24 |
| ImmMale | (IMM) 12  | 2  | 322 | A | 3   | 25 |
| Male    | 36        | 6  | 322 | B | 2   | 22 |
| Male    | 38        | 6  | 322 | B | 3   | 21 |
| Male    | 40        | 6  | 322 | B | 2   | 19 |
| Male    | 95        | 14 | 322 | C | 3   | 28 |
| Male    | 97        | 14 | 322 | C | 2   | 22 |
| Male    | 100       | 14 | 322 | C | 3   | 20 |
| ImmMale | (IMM) 96  | 14 | 322 | C | 1.5 | 15 |
| ImmMale | (IMM) 98  | 14 | 322 | C | 3   | 27 |
| Male    | 124       | 18 | 322 | D | 2   | 17 |
| Male    | 126       | 18 | 322 | D | 3   | 13 |
| Male    | 128       | 18 | 322 | D | 3   | 17 |

Table S17b. Gonad histology data for mature female fish at the end of the life cycle exposure of fathead minnows to metformin.

| <b>Females</b> |      |                  |                         |           |                     |                      |                     |           |                        |
|----------------|------|------------------|-------------------------|-----------|---------------------|----------------------|---------------------|-----------|------------------------|
| Fish           | Tank | Metformin (µg/L) | Total # oocytes counted | # Primary | # Cortical Alveolar | # Early Vitellogenic | # Late Vitellogenic | # Atretic | Atretic Score (0 to 3) |
| 2              | 1    | Controls         | 259                     | 157       | 25                  | 31                   | 46                  | 0         | 0                      |
| 4              | 1    | Controls         | 262                     | 163       | 48                  | 18                   | 32                  | 1         | 1                      |
| 6              | 1    | Controls         | 309                     | 166       | 68                  | 20                   | 55                  | 0         | 0                      |
| 13             | 3    | Controls         | 275                     | 168       | 44                  | 15                   | 47                  | 1         | 1                      |
| 44             | 7    | Controls         | 326                     | 194       | 63                  | 18                   | 51                  | 0         | 0                      |
| 46             | 7    | Controls         | 304                     | 256       | 15                  | 0                    | 0                   | 33        | 3                      |
| 48             | 7    | Controls         | 198                     | 138       | 23                  | 17                   | 20                  | 0         | 0                      |
| 49             | 7    | Controls         | 619                     | 440       | 81                  | 81                   | 16                  | 1         | 1                      |
| 66             | 10   | Controls         | 285                     | 159       | 60                  | 26                   | 40                  | 0         | 0                      |
| 70             | 10   | Controls         | 294                     | 199       | 49                  | 46                   | 0                   | 0         | 0                      |
| 71             | 10   | Controls         | 262                     | 153       | 53                  | 56                   | 0                   | 0         | 0                      |
| 73             | 11   | Controls         | 184                     | 83        | 30                  | 31                   | 39                  | 1         | 1                      |
| 75             | 11   | Controls         | 215                     | 87        | 53                  | 26                   | 48                  | 1         | 1                      |
| 77             | 11   | Controls         | 233                     | 137       | 29                  | 20                   | 44                  | 3         | 1                      |
| 78             | 11   | Controls         | 310                     | 187       | 40                  | 36                   | 47                  | 0         | 1                      |
| 89             | 13   | Controls         | 249                     | 173       | 26                  | 19                   | 31                  | 0         | 0                      |
| 91             | 13   | Controls         | 342                     | 254       | 40                  | 45                   | 0                   | 3         | 1                      |
| 93             | 13   | Controls         | 228                     | 166       | 9                   | 14                   | 39                  | 0         | 0                      |
| 94             | 13   | Controls         | 365                     | 245       | 65                  | 53                   | 2                   | 0         | 0                      |
| 110            | 16   | Controls         | 263                     | 135       | 40                  | 27                   | 61                  | 0         | 0                      |
| 113            | 16   | Controls         | 154                     | 86        | 25                  | 12                   | 30                  | 1         | 1                      |
| 115            | 16   | Controls         | 277                     | 112       | 55                  | 49                   | 60                  | 1         | 1                      |
| 133            | 19   | Controls         | 404                     | 239       | 27                  | 62                   | 60                  | 16        | 3                      |
| 135            | 19   | Controls         | 170                     | 64        | 20                  | 31                   | 55                  | 0         | 0                      |
| 137            | 19   | Controls         | 155                     | 69        | 23                  | 18                   | 44                  | 1         | 1                      |
| 138            | 19   | Controls         | 838                     | 747       | 39                  | 11                   | 41                  | 0         | 1                      |
| 139            | 19   | Controls         | 271                     | 124       | 29                  | 34                   | 84                  | 0         | 0                      |
| 21             | 4    | 3.0              | 222                     | 121       | 40                  | 14                   | 47                  | 0         | 0                      |
| 23             | 4    | 3.0              | 341                     | 184       | 69                  | 29                   | 59                  | 0         | 2                      |
| 25             | 4    | 3.0              | 252                     | 131       | 55                  | 22                   | 44                  | 0         | 3                      |
| 26             | 4    | 3.0              | 221                     | 96        | 43                  | 34                   | 46                  | 2         | 1                      |
| 27             | 4    | 3.0              | 241                     | 132       | 38                  | 18                   | 53                  | 0         | 0                      |
| 59             | 9    | 3.0              | 171                     | 59        | 30                  | 22                   | 51                  | 9         | 2                      |
| 61             | 9    | 3.0              | 321                     | 238       | 47                  | 19                   | 10                  | 7         | 2                      |
| 63             | 9    | 3.0              | 207                     | 139       | 21                  | 10                   | 37                  | 0         | 0                      |

|     |    |     |     |     |     |    |    |    |   |
|-----|----|-----|-----|-----|-----|----|----|----|---|
| 103 | 15 | 3.0 | 298 | 191 | 48  | 20 | 39 | 0  | 0 |
| 105 | 15 | 3.0 | 294 | 162 | 53  | 34 | 43 | 2  | 1 |
| 106 | 15 | 3.0 | 312 | 172 | 53  | 21 | 64 | 2  | 1 |
| 108 | 15 | 3.0 | 554 | 431 | 68  | 52 | 1  | 2  | 1 |
| 118 | 17 | 3.0 | 403 | 337 | 52  | 13 | 0  | 1  | 2 |
| 120 | 17 | 3.0 | 309 | 185 | 60  | 19 | 45 | 0  | 0 |
| 122 | 17 | 3.0 | 224 | 108 | 41  | 34 | 40 | 1  | 1 |
| 123 | 17 | 3.0 | 224 | 123 | 31  | 20 | 50 | 0  | 0 |
| 29  | 5  | 31  | 245 | 160 | 26  | 27 | 32 | 0  | 0 |
| 31  | 5  | 31  | 341 | 199 | 38  | 35 | 69 | 0  | 0 |
| 33  | 5  | 31  | 175 | 73  | 26  | 28 | 31 | 17 | 3 |
| 34  | 5  | 31  | 320 | 209 | 44  | 30 | 35 | 2  | 1 |
| 35  | 5  | 31  | 240 | 141 | 33  | 19 | 46 | 1  | 1 |
| 51  | 8  | 31  | 50  | 7   | 12  | 24 | 7  | 0  | 3 |
| 53  | 8  | 31  | 172 | 74  | 42  | 17 | 39 | 0  | 0 |
| 55  | 8  | 31  | 216 | 135 | 25  | 17 | 39 | 0  | 0 |
| 56  | 8  | 31  | 252 | 157 | 42  | 16 | 36 | 1  | 1 |
| 57  | 8  | 31  | 178 | 100 | 29  | 36 | 13 | 0  | 0 |
| 81  | 12 | 31  | 277 | 109 | 63  | 32 | 72 | 1  | 1 |
| 83  | 12 | 31  | 289 | 203 | 34  | 25 | 27 | 0  | 0 |
| 85  | 12 | 31  | 242 | 133 | 46  | 13 | 50 | 0  | 0 |
| 86  | 12 | 31  | 469 | 356 | 70  | 26 | 17 | 0  | 0 |
| 87  | 12 | 31  | 473 | 331 | 63  | 29 | 49 | 1  | 1 |
| 141 | 20 | 31  | 546 | 353 | 102 | 57 | 1  | 33 | 3 |
| 143 | 20 | 31  | 301 | 176 | 43  | 36 | 45 | 1  | 1 |
| 146 | 20 | 31  | 374 | 249 | 43  | 24 | 58 | 0  | 0 |
| 8   | 2  | 322 | 143 | 72  | 27  | 16 | 25 | 3  | 1 |
| 10  | 2  | 322 | 273 | 185 | 25  | 30 | 33 | 0  | 0 |
| 37  | 6  | 322 | 287 | 171 | 53  | 22 | 39 | 2  | 1 |
| 39  | 6  | 322 | 236 | 121 | 49  | 17 | 47 | 2  | 1 |
| 41  | 6  | 322 | 150 | 89  | 16  | 20 | 25 | 0  | 0 |
| 42  | 6  | 322 | 325 | 178 | 48  | 40 | 59 | 0  | 0 |
| 99  | 14 | 322 | 176 | 93  | 18  | 22 | 43 | 0  | 0 |
| 101 | 14 | 322 | 419 | 233 | 80  | 42 | 62 | 2  | 1 |
| 125 | 18 | 322 | 325 | 154 | 61  | 72 | 37 | 1  | 1 |
| 127 | 18 | 322 | 273 | 176 | 57  | 13 | 26 | 1  | 1 |
| 129 | 18 | 322 | 237 | 119 | 42  | 25 | 49 | 2  | 1 |
| 130 | 18 | 322 | 173 | 96  | 31  | 20 | 26 | 0  | 0 |
| 131 | 18 | 322 | 461 | 327 | 63  | 24 | 47 | 0  | 0 |



Table S18. List of the ten statistically-significant differences observed in the life cycle exposures of fathead minnows to metformin. Sex of fish, time point, and concentration where difference was seen, as well as p values (compared to controls), are shown. Abbreviations are dph = days post-hatch, con = controls, M = males, F = females.

| Number | <u>Statistically significant differences</u>                     |                 |                 | <u>Concentration of metformin (<math>\mu\text{g/L}</math>)</u> |    |     | p value |
|--------|------------------------------------------------------------------|-----------------|-----------------|----------------------------------------------------------------|----|-----|---------|
|        | Endpoint & Difference                                            | Sex             | Time-point      | 3.0                                                            | 31 | 322 |         |
| 1      | Greater length (21.4 mm compared to control 19.6 mm)             | immature        | 30 dph          |                                                                | X  |     | 0.038   |
| 2      | Higher condition factor (0.906 compared to controls 0.864)       | immature        | 64 dph          |                                                                |    | X   | 0.033   |
| 3      | More mature fish compared to controls                            | M and F         | 92 dph          | X                                                              |    |     | 0.005   |
| 4      | Delayed mean post-hatch breeding start (delay = roughly 10 days) | Breeding groups | ~97 to 107 dph  |                                                                | X  |     | 0.003   |
| 5      | Larger relative ovary size (GSI of 16.5 vs. con 13.4 %)          | F               | End of exposure |                                                                |    | X   | 0.041   |
| 6      | Slightly larger ovipositors                                      | F               | End of exposure |                                                                |    | X   | 0.023   |
| 7      | Slightly increased secondary sex characteristics                 | M               | End of exposure |                                                                | X  |     | 0.045   |
| 8      | Higher percentage of normal eggs (76.7 vs. con 69.7 %)           | F               | F1              | X                                                              |    |     | 0.008   |
| 9      | Lower percentage of dead eggs (5.4 vs. con 9.4 %)                | F               | F1              | X                                                              |    |     | 0.012   |
| 10     | Lower percentage of dead eggs (6.2 vs. con 9.4 %)                | F               | F1              |                                                                | X  |     | 0.034   |

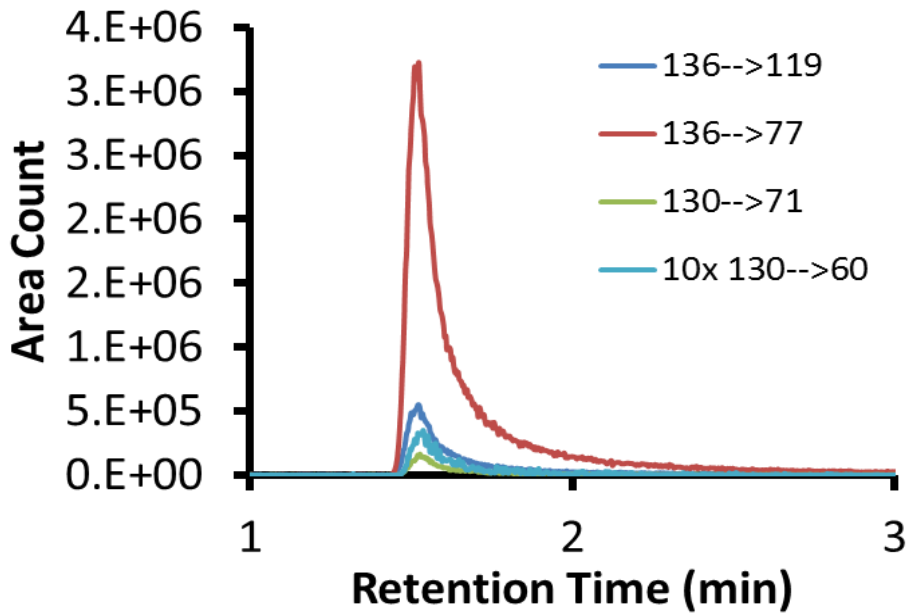

Figure S1. Area count versus retention time for metformin.

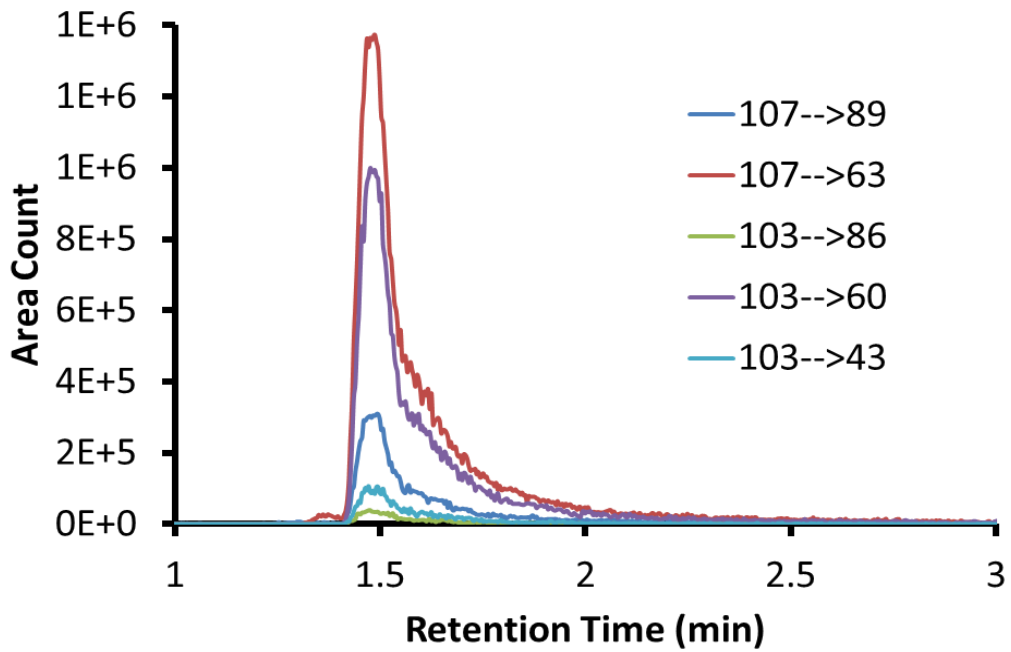

Figure S2. Area count versus retention time for guanylyurea.

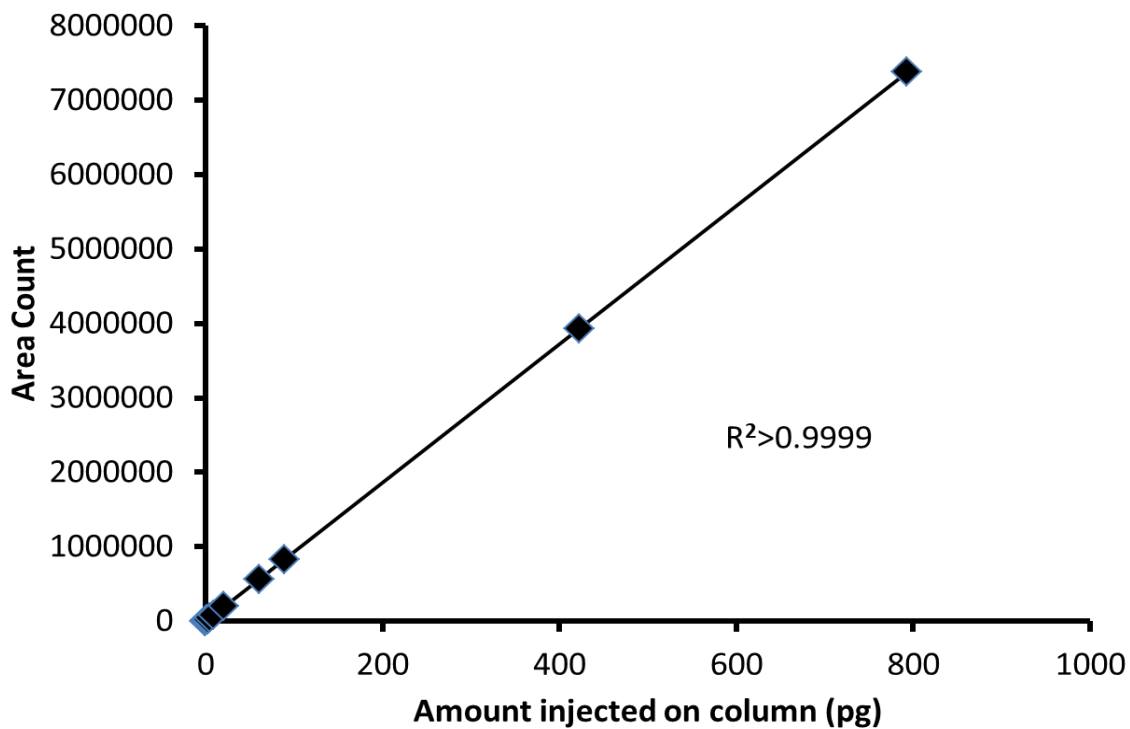

Figure S3. Area count versus amount injected on column for metformin.

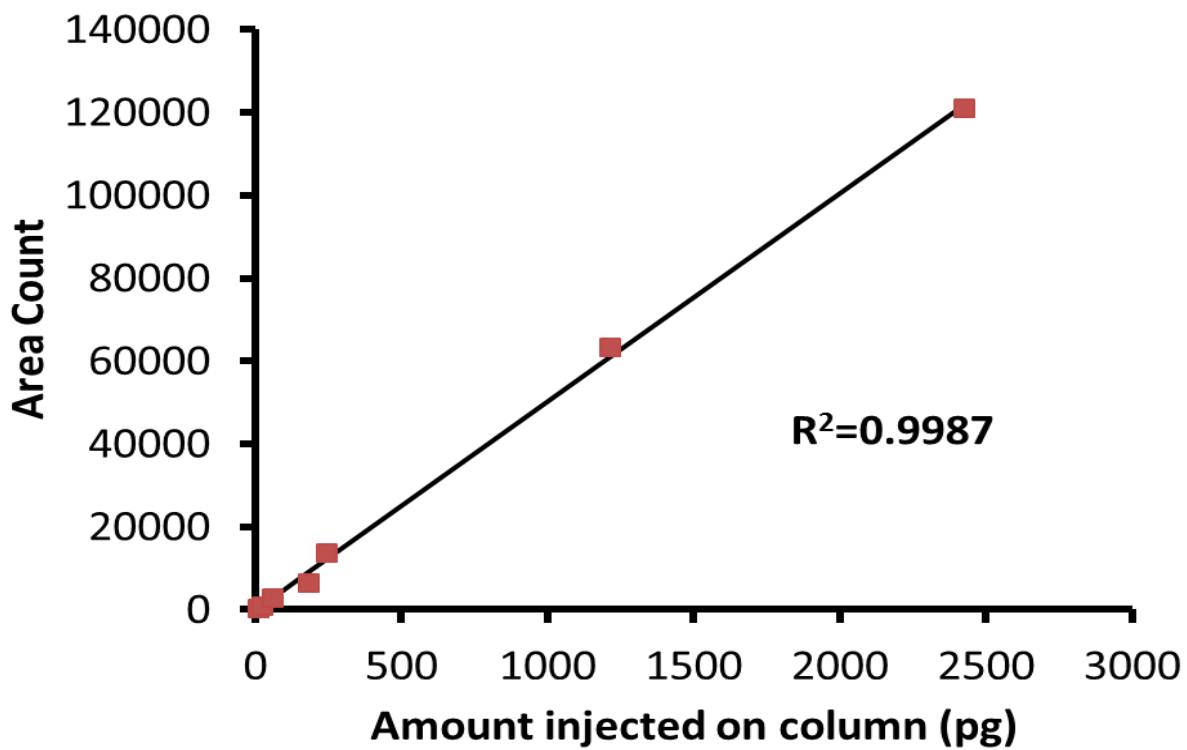

Figure S4. Area count versus amount injected on column for guanylyurea.

|    |    |    |    |    |    |    |    |                                           |    |
|----|----|----|----|----|----|----|----|-------------------------------------------|----|
| 1  | 2  | 3  | 4  | 5  | 6  | 7  | 8  | 9 leak<br>dripped<br>in from<br>above     | 10 |
| 11 | 12 | 13 | 14 | 15 | 16 | 17 | 18 | 19<br>leak<br>dripped<br>in from<br>above | 20 |

Figure S5. Set-up of aquaria during the life cycle exposure of fathead minnows to metformin. Leaks from the header tank (containing clean water) dripped over dusty shelves and into tanks 9 and 19 killing some of the fish.
