# Supplementary material for: Fathead minnow exposed to environmentally relevant concentrations of metformin for one life cycle show no adverse effects
Source: Atypon-hosted journal article supplement (doi:10.1139/facets-2020-0106), 2021-01-01
Supplement: facets-2020-0106_supplement3.pdf [file facets-2020-0106_supplement3.pdf]

**Males**

| Tank    | Metformin<br>(µg/L) | Fish # | WEIGHT (g) | Total<br>length<br>(cm) | Standard<br>length (cm) | Tail<br>length<br>(cm) | Condition<br>factor | Sex<br>external<br>(M, F, I) | Fin<br>dot<br>(0-1) | Fatpad<br>score (0-3) | Tubercles<br>(total #) | Large<br>tubercles<br>(#) |
|---------|---------------------|--------|------------|-------------------------|-------------------------|------------------------|---------------------|------------------------------|---------------------|-----------------------|------------------------|---------------------------|
| 1 Ctrl  |                     | 1      | 3.18       | 6.00                    | 5.6 fork                |                        | 1.47                | M                            | 1                   | 2                     | 12                     | 10                        |
| 1 Ctrl  |                     | 3      | 4.25       | 6.60                    | 5.50                    | 1.10                   | 1.48                | M                            | 1                   | 3                     | 12                     | 8                         |
| 1 Ctrl  |                     | 5      | 3.18       | 6.00                    | 5.00                    | 1.00                   | 1.47                | M                            | 1                   | 2                     | 8                      | 2                         |
| 3 Ctrl  |                     | 14     | 4.75       | 7.00                    | 5.90                    | 1.10                   | 1.38                | M                            | 1                   | 1                     | 7                      | 5                         |
| 3 Ctrl  |                     | 15     | 3.16       | 5.80                    | 5.00                    | 0.80                   | 1.62                | M                            | 1                   | 3                     | 9                      | 7                         |
| 3 Ctrl  |                     | 17     | 2.78       | 5.85                    | 4.70                    | 1.15                   | 1.39                | M                            | 1                   | 2                     | 1                      | 0                         |
| 3 Ctrl  |                     | 19     | 3.70       | 6.30                    | 5.40                    | 0.90                   | 1.48                | M                            | 1                   | 3                     | 13                     | 6                         |
| 7 Ctrl  |                     | 43     | 2.91       | 6.20                    | 5.40                    | 0.80                   | 1.22                | M                            | 1                   | 2                     | 2                      | 0                         |
| 7 Ctrl  |                     | 45     | 3.30       | 6.20                    | 5.15                    | 1.05                   | 1.38                | M                            | 1                   | 3.5                   | 1                      | 0                         |
| 7 Ctrl  |                     | 47     | 3.36       | 5.65                    | 4.70                    | 0.95                   | 1.86                | M                            | 1                   | 3                     | 1                      | 1                         |
| 10 Ctrl |                     | 65     | 3.75       | 5.90                    | 5.00                    | 0.90                   | 1.83                | M                            | 1                   | 3                     | 4                      | 2                         |
| 10 Ctrl |                     | 67     | 3.55       | 6.10                    | 5.10                    | 1.00                   | 1.56                | M                            | 1                   | 2                     | 0                      | 0                         |
| 10 Ctrl |                     | 68     | 3.49       | 6.35                    | 5.30                    | 1.05                   | 1.36                | M                            | 1                   | 1                     | 12                     | 6                         |
| 10 Ctrl |                     | 69     | 3.15       | 6.00                    | 5.00                    | 1.00                   | 1.46                | M                            | 1                   | 2                     | 7                      | 1                         |
| 11 Ctrl |                     | 72     | 3.06       | 6.00                    | 5.10                    | 0.90                   | 1.42                | M                            | 1                   | 2                     | 1                      | 0                         |
| 11 Ctrl |                     | 74     | 3.42       | 6.10                    | 5.20                    | 0.90                   | 1.51                | M                            | 1                   | 3                     | 15                     | 8                         |
| 11 Ctrl |                     | 76     | 2.74       | 5.50                    | 4.50                    | 1.00                   | 1.65                | M                            | 1                   | 2                     | 7                      | 4                         |
| 13 Ctrl |                     | 88     | 3.17       | 5.80                    | 4.90                    | 0.90                   | 1.62                | M                            | 1                   | 3                     | 8                      | 4                         |
| 13 Ctrl |                     | 90     | 2.57       | 5.50                    | 4.50                    | 1.00                   | 1.54                | M                            | 1                   | 3                     | 6                      | 4                         |
| 13 Ctrl |                     | 92     | 2.44       | 5.50                    | 4.50                    | 1.00                   | 1.47                | M                            | 1                   | 1                     | 11                     | 7                         |
| 16 Ctrl |                     | 111    | 2.75       | 5.70                    | 4.60                    | 1.10                   | 1.48                | M                            | 1                   | 2                     | 3                      | 1                         |
| 16 Ctrl |                     | 112    | 3.63       | 6.25                    | 5.30                    | 0.95                   | 1.49                | M                            | 1                   | 2                     | 1                      | 1                         |
| 16 Ctrl |                     | 114    | 3.32       | 6.60                    | 5.50                    | 1.10                   | 1.15                | M                            | 1                   | 0                     | 0                      | 0                         |
| 16 Ctrl |                     | 116    | 3.78       | 6.20                    | 5.30                    | 0.90                   | 1.59                | M                            | 1                   | 3                     | 3                      | 1                         |
| 19 Ctrl |                     | 132    | 2.87       | 6.00                    | 5.10                    | 0.90                   | 1.33                | M                            | 1                   | 1                     | 0                      | 0                         |
| 19 Ctrl |                     | 134    | 2.65       | 5.85                    | 4.80                    | 1.05                   | 1.32                | M                            | 1                   | 3                     | 3                      | 3                         |
| 19 Ctrl |                     | 136    | 2.42       | 5.70                    | 4.75                    | 0.95                   | 1.31                | M                            | 1                   | 1                     | 9                      | 3                         |
| 4       | 3                   | 20     | 3.03       | 6.20                    | 5.10                    | 1.10                   | 1.27                | M                            | 1                   | 1                     | 2                      | 1                         |
| 4       | 3                   | 22     | 3.26       | 5.90                    | 4.25                    | 1.65                   | 1.59                | M                            | 1                   | 3                     | 1                      | 1                         |
| 4       | 3                   | 24     | 2.75       | 5.60                    | 4.55                    | 1.05                   | 1.57                | M                            | 1                   | 3                     | 4                      | 0                         |
| 9       | 3                   | 58     | 3.51       | 6.10                    | 5.05                    | 1.05                   | 1.55                | M                            | 1                   | 3                     | 15                     | 10                        |
| 9       | 3                   | 60     | 2.98       | 5.85                    | 4.80                    | 1.05                   | 1.49                | M                            | 1                   | 3                     | 12                     | 4                         |
| 9       | 3                   | 62     | 3.01       | 6.25                    | 5.20                    | 1.05                   | 1.23                | M                            | 1                   | 1                     | 8                      | 3                         |
| 9       | 3                   | 64     |            |                         |                         |                        | I                   |                              |                     |                       |                        |                           |
| 15      | 3                   | 102    | 2.75       | 5.70                    | 4.70                    | 1.00                   | 1.48                | M                            | 1                   | 3                     | 0                      | 0                         |
| 15      | 3                   | 104    | 3.52       | 6.30                    | 5.25                    | 1.05                   | 1.41                | M                            | 1                   | 3                     | 2                      | 0                         |
| 15      | 3                   | 107    | 2.20       | 5.50                    | 4.50                    | 1.00                   | 1.32                | M                            | 1                   | 3                     | 3                      | 0                         |
| 17      | 3                   | 117    | 3.36       | 6.10                    | 5.25                    | 0.85                   | 1.48                | M                            | 1                   | 1                     | 2                      | 0                         |
| 17      | 3                   | 119    | 3.38       | 5.80                    | 4.80                    | 1.00                   | 1.73                | M                            | 1                   | 3                     | 9                      | 9                         |
| 17      | 3                   | 121    | 2.44       | 6.10                    | 5.10                    | 1.00                   | 1.07                | M                            | 1                   | 2                     | 4                      | 1                         |
| 5       | 30                  | 28     | 2.36       | 5.50                    | 4.50                    | 1.00                   | 1.42                | M                            | 1                   | 1                     | 6                      | 3                         |
| 5       | 30                  | 30     | 3.57       | 6.30                    | 5.30                    | 1.00                   | 1.43                | M                            | 1                   | 3                     | 6                      | 3                         |
| 5       | 30                  | 32     | 3.94       | 6.50                    | 5.40                    | 1.10                   | 1.43                | M                            | 1                   | 3                     | 6                      | 6                         |

|    |     |     |      |      |      |      |        |   |     |    |    |
|----|-----|-----|------|------|------|------|--------|---|-----|----|----|
| 8  | 30  | 50  | 3.32 | 5.90 | 4.90 | 1.00 | 1.62 M | 1 | 3   | 15 | 8  |
| 8  | 30  | 52  | 2.16 | 5.50 | 4.50 | 1.00 | 1.30 M | 1 | 2   | 11 | 7  |
| 8  | 30  | 54  | 2.65 | 5.65 | 4.55 | 1.10 | 1.47 M | 1 | 3   | 19 | 14 |
| 12 | 30  | 80  | 3.73 | 6.20 | 5.20 | 1.00 | 1.57 M | 1 | 3   | 20 | 15 |
| 12 | 30  | 82  | 4.30 | 6.60 | 5.40 | 1.20 | 1.50 M | 1 | 2   | 7  | 5  |
| 12 | 30  | 84  | 3.82 | 6.10 | 5.20 | 0.90 | 1.68 M | 1 | 3   | 12 | 6  |
| 20 | 30  | 140 | 3.59 | 6.10 | 5.10 | 1.00 | 1.58 M | 1 | 3   | 13 | 6  |
| 20 | 30  | 142 | 3.91 | 6.00 | 4.95 | 1.05 | 1.81 M | 1 | 3.5 | 10 | 5  |
| 20 | 30  | 144 | 4.00 | 6.65 | 5.35 | 1.30 | 1.36 M | 1 | 1   | 6  | 2  |
| 2  | 300 | 7   | 2.88 | 6.00 | 5.10 | 0.90 | 1.33 M | 1 | 2   | 1  | 0  |
| 2  | 300 | 9   | 3.37 | 6.00 | 5.30 | 0.70 | 1.56 M | 1 | 3   | 15 | 12 |
| 2  | 300 | 11  | 3.59 | 6.00 | 4.90 | 1.10 | 1.66 M | 1 | 3   | 5  | 5  |
| 2  | 300 | 12  |      |      |      |      | I      |   |     |    |    |
| 6  | 300 | 36  | 3.55 | 6.40 | 5.30 | 1.10 | 1.35 M | 1 | 2   | 10 | 4  |
| 6  | 300 | 38  | 3.02 | 6.10 | 5.50 | 0.60 | 1.33 M | 1 | 2   | 2  | 1  |
| 6  | 300 | 40  | 2.51 | 5.40 | 4.50 | 0.90 | 1.59 M | 1 | 3   | 4  | 0  |
| 14 | 300 | 95  | 4.26 | 6.40 | 5.40 | 1.00 | 1.63 M | 1 | 3   | 15 | 11 |
| 14 | 300 | 96  |      |      |      |      | I      |   |     |    |    |
| 14 | 300 | 97  | 3.39 | 6.10 | 5.00 | 1.10 | 1.49 M | 1 | 3   | 11 | 5  |
| 14 | 300 | 98  |      |      |      |      | I      |   |     |    |    |
| 14 | 300 | 100 | 3.57 | 6.30 | 5.20 | 1.10 | 1.43 M | 1 | 3   | 10 | 5  |
| 18 | 300 | 124 | 3.16 | 5.90 | 4.90 | 1.00 | 1.54 M | 1 | 3   | 5  | 4  |
| 18 | 300 | 126 | 1.88 | 5.30 | 4.30 | 1.00 | 1.26 M | 1 | 2   | 1  | 0  |
| 18 | 300 | 128 | 2.12 | 5.25 | 4.30 | 0.95 | 1.47 M | 1 | 2   | 6  | 6  |

#### Males (cont)

| Tank    | Metformin<br>(µg/L) | Fish # | Banding<br>score (0-3) | Male<br>index | Tubercle<br>index | Liver<br>weight<br>(mg) | Liver-<br>somatic<br>index | Gonad<br>weight<br>(mg) | Gonado-<br>somatic<br>index | Carcass<br>weight (g) |
|---------|---------------------|--------|------------------------|---------------|-------------------|-------------------------|----------------------------|-------------------------|-----------------------------|-----------------------|
| 1 Ctrl  |                     | 1      | 1                      | 7.2           | 3.2               | 41.94                   | 1.32                       | 48.27                   | 1.52                        | 2.69                  |
| 1 Ctrl  |                     | 3      | 2                      | 8.8           | 2.8               | 55.54                   | 1.31                       | 41.56                   | 0.98                        | 3.68                  |
| 1 Ctrl  |                     | 5      | 1                      | 5.2           | 1.2               | 90.23                   | 2.84                       | 54.92                   | 1.73                        | 2.72                  |
| 3 Ctrl  |                     | 14     | 2                      | 5.7           | 1.7               | 135.52                  | 2.85                       | 72.50                   | 1.53                        | 3.84                  |
| 3 Ctrl  |                     | 15     | 2                      | 8.3           | 2.3               | 71.73                   | 2.27                       | 58.09                   | 1.84                        | 2.50                  |
| 3 Ctrl  |                     | 17     | 3                      | 6.1           | 0.1               | 57.73                   | 2.08                       | 41.23                   | 1.48                        | 2.41                  |
| 3 Ctrl  |                     | 19     | 3                      | 9.5           | 2.5               | 85.13                   | 2.30                       | 38.20                   | 1.03                        | 3.21                  |
| 7 Ctrl  |                     | 43     | 3                      | 6.2           | 0.2               | 64.01                   | 2.20                       | 32.92                   | 1.13                        | 2.43                  |
| 7 Ctrl  |                     | 45     | 3                      | 7.6           | 0.1               | 57.13                   | 1.73                       | 28.93                   | 0.88                        | 2.81                  |
| 7 Ctrl  |                     | 47     | 3                      | 7.3           | 0.3               | 59.12                   | 1.76                       | 38.01                   | 1.13                        | 2.86                  |
| 10 Ctrl |                     | 65     | 3                      | 7.8           | 0.8               | 121.67                  | 3.24                       | 37.71                   | 1.01                        | 3.21                  |
| 10 Ctrl |                     | 67     | 3                      | 6             | 0                 | 127.30                  | 3.59                       | 42.10                   | 1.19                        | 2.92                  |
| 10 Ctrl |                     | 68     | 0                      | 4.4           | 2.4               | 111.34                  | 3.19                       | 72.02                   | 2.06                        | 2.89                  |
| 10 Ctrl |                     | 69     | 2                      | 5.9           | 0.9               | 83.52                   | 2.65                       | 39.25                   | 1.25                        | 2.69                  |
| 11 Ctrl |                     | 72     | 2                      | 5.1           | 0.1               | 73.20                   | 2.39                       | 45.30                   | 1.48                        | 2.53                  |
| 11 Ctrl |                     | 74     | 1                      | 8.1           | 3.1               | 55.17                   | 1.61                       | 34.98                   | 1.02                        | 2.95                  |
| 11 Ctrl |                     | 76     | 2                      | 6.5           | 1.5               | 60.20                   | 2.20                       | 28.36                   | 1.04                        | 2.24                  |

|         |     |     |   |      |     |        |      |       |  |      |      |
|---------|-----|-----|---|------|-----|--------|------|-------|--|------|------|
| 13 Ctrl |     | 88  | 2 | 7.6  | 1.6 | 88.57  | 2.79 | 29.13 |  | 0.92 | 2.62 |
| 13 Ctrl |     | 90  | 2 | 7.4  | 1.4 | 71.00  | 2.76 | 44.98 |  | 1.75 | 2.17 |
| 13 Ctrl |     | 92  | 1 | 5.5  | 2.5 | 60.93  | 2.50 | 16.72 |  | 0.69 | 2.07 |
| 16 Ctrl |     | 111 | 2 | 5.5  | 0.5 | 72.04  | 2.62 | 41.56 |  | 1.51 | 2.36 |
| 16 Ctrl |     | 112 | 3 | 6.3  | 0.3 | 118.20 | 3.26 | 30.66 |  | 0.84 | 2.91 |
| 16 Ctrl |     | 114 | 1 | 2    | 0   | 88.66  | 2.67 | 61.30 |  | 1.85 | 2.74 |
| 16 Ctrl |     | 116 | 3 | 7.5  | 0.5 | 113.71 | 3.01 | 39.62 |  | 1.05 | 3.23 |
| 19 Ctrl |     | 132 | 2 | 4    | 0   | 96.13  | 3.35 | 49.56 |  | 1.73 | 2.29 |
| 19 Ctrl |     | 134 | 1 | 5.9  | 0.9 | 66.56  | 2.51 | 38.60 |  | 1.46 | 2.21 |
| 19 Ctrl |     | 136 | 1 | 4.5  | 1.5 | 70.80  | 2.93 | 27.81 |  | 1.15 | 2.04 |
| 4       | 3   | 20  | 0 | 2.4  | 0.4 | 60.28  | 1.99 | 37.92 |  | 1.25 | 2.52 |
| 4       | 3   | 22  | 2 | 6.3  | 0.3 | 80.45  | 2.47 | 30.44 |  | 0.93 | 2.80 |
| 4       | 3   | 24  | 3 | 7.4  | 0.4 | 99.00  | 3.60 | 52.57 |  | 1.91 | 2.33 |
| 9       | 3   | 58  | 2 | 9.5  | 3.5 | 91.07  | 2.59 | 24.27 |  | 0.69 | 2.95 |
| 9       | 3   | 60  | 3 | 9    | 2   | 54.19  | 1.82 | 22.17 |  | 0.74 | 2.50 |
| 9       | 3   | 62  | 2 | 5.4  | 1.4 | 65.96  | 2.19 | 52.01 |  | 1.73 | 2.54 |
| 9       | 3   | 64  |   |      |     | 84.20  |      | 63.95 |  |      |      |
| 15      | 3   | 102 | 2 | 6    | 0   | 68.65  | 2.50 | 18.04 |  | 0.66 | 2.31 |
| 15      | 3   | 104 | 3 | 7.2  | 0.2 | 118.79 | 3.37 | 43.08 |  | 1.22 | 2.96 |
| 15      | 3   | 107 | 3 | 7.3  | 0.3 | 44.73  | 2.03 | 25.88 |  | 1.18 | 1.92 |
| 17      | 3   | 117 | 3 | 5.2  | 0.2 | 90.17  | 2.68 | 35.44 |  | 1.05 | 2.86 |
| 17      | 3   | 119 | 3 | 9.7  | 2.7 | 76.65  | 2.27 | 46.05 |  | 1.36 | 2.95 |
| 17      | 3   | 121 | 2 | 5.6  | 0.6 | 27.85  | 1.14 | 13.36 |  | 0.55 | 2.05 |
| 5       | 30  | 28  | 2 | 5.2  | 1.2 | 56.96  | 2.41 | 34.76 |  | 1.47 | 1.99 |
| 5       | 30  | 30  | 2 | 7.2  | 1.2 | 109.82 | 3.08 | 55.16 |  | 1.55 | 3.00 |
| 5       | 30  | 32  | 2 | 7.8  | 1.8 | 127.24 | 3.23 | 72.02 |  | 1.83 | 3.26 |
| 8       | 30  | 50  | 2 | 9.1  | 3.1 | 57.59  | 1.73 | 66.22 |  | 1.99 | 2.81 |
| 8       | 30  | 52  | 3 | 8.5  | 2.5 | 27.98  | 1.30 | 18.22 |  | 0.84 | 1.89 |
| 8       | 30  | 54  | 2 | 10.7 | 4.7 | 72.21  | 2.72 | 30.93 |  | 1.17 | 2.24 |
| 12      | 30  | 80  | 2 | 11   | 5   | 97.88  | 2.62 | 33.75 |  | 0.90 | 3.15 |
| 12      | 30  | 82  | 2 | 6.7  | 1.7 | 184.46 | 4.29 | 55.73 |  | 1.30 | 3.65 |
| 12      | 30  | 84  | 3 | 9.4  | 2.4 | 109.77 | 2.87 | 49.43 |  | 1.29 | 3.20 |
| 20      | 30  | 140 | 3 | 9.5  | 2.5 | 148.86 | 4.15 | 52.48 |  | 1.46 | 3.03 |
| 20      | 30  | 142 | 2 | 8.5  | 2   | 107.12 | 2.74 | 30.80 |  | 0.79 | 3.43 |
| 20      | 30  | 144 | 2 | 5    | 1   | 133.40 | 3.34 | 78.55 |  | 1.96 | 3.33 |
| 2       | 300 | 7   | 2 | 5.1  | 0.1 | 65.34  | 2.27 | 50.36 |  | 1.75 | 2.38 |
| 2       | 300 | 9   | 2 | 9.9  | 3.9 | 101.18 | 3.00 | 34.56 |  | 1.03 | 2.79 |
| 2       | 300 | 11  | 2 | 7.5  | 1.5 | 76.99  | 2.14 | 50.31 |  | 1.40 | 3.00 |
| 2       | 300 | 12  |   |      |     | 112.65 |      | 63.17 |  |      |      |
| 6       | 300 | 36  | 1 | 5.8  | 1.8 | 90.81  | 2.56 | 31.95 |  | 0.90 | 3.00 |
| 6       | 300 | 38  | 1 | 4.4  | 0.4 | 86.30  | 2.86 | 37.75 |  | 1.25 | 2.41 |
| 6       | 300 | 40  | 2 | 6.4  | 0.4 | 51.45  | 2.05 | 25.65 |  | 1.02 | 2.12 |
| 14      | 300 | 95  | 3 | 10.7 | 3.7 | 124.28 | 2.92 | 58.02 |  | 1.36 | 3.64 |
| 14      | 300 | 96  |   |      |     | 65.41  |      | 17.90 |  |      |      |
| 14      | 300 | 97  | 3 | 9.1  | 2.1 | 28.53  | 0.84 | 24.57 |  | 0.72 | 2.87 |
| 14      | 300 | 98  |   |      |     | 124.78 |      | 53.39 |  |      |      |
| 14      | 300 | 100 | 2 | 8    | 2   | 40.04  | 1.12 | 25.99 |  | 0.73 | 3.06 |

|    |     |     |   |     |     |       |      |       |      |      |
|----|-----|-----|---|-----|-----|-------|------|-------|------|------|
| 18 | 300 | 124 | 2 | 7.3 | 1.3 | 86.75 | 2.75 | 37.31 | 1.18 | 2.68 |
| 18 | 300 | 126 | 1 | 4.1 | 0.1 | 28.53 | 1.52 | 14.57 | 0.78 | 1.64 |
| 18 | 300 | 128 | 2 | 6.8 | 1.8 | 49.32 | 2.33 | 24.95 | 1.18 | 1.77 |

## Females

| Tank    | Metformin<br>(µg/L) | Fish # | WEIGHT (g) | Total<br>length<br>(cm) | Standard<br>length (cm) | Tail<br>length<br>(cm) | Condition<br>factor | Sex<br>external<br>(M, F, I) | Oviposito<br>r length<br>(optical<br>units) | Ovipositor<br>width (optical<br>units) | Ovipositor<br>area (mm <sup>2</sup> ) |
|---------|---------------------|--------|------------|-------------------------|-------------------------|------------------------|---------------------|------------------------------|---------------------------------------------|----------------------------------------|---------------------------------------|
| 1 Ctrl  |                     | 2      | 2.20       | 5.60                    |                         |                        |                     | 1.25 F                       | 12                                          | 7                                      | 1.06                                  |
| 1 Ctrl  |                     | 4      | 1.47       | 5.30                    |                         |                        |                     | 0.99 F                       | 14                                          | 10                                     | 1.76                                  |
| 1 Ctrl  |                     | 6      | 1.52       | 5.05                    | 4.00                    | 1.05                   |                     | 1.18 F                       | 14                                          | 9                                      | 1.59                                  |
| 3 Ctrl  |                     | 13     | 1.59       | 5.20                    | 4.30                    | 0.90                   |                     | 1.13 F                       | 13                                          | 9                                      | 1.47                                  |
| 3 Ctrl  |                     | 16     |            |                         |                         |                        |                     | I                            |                                             |                                        |                                       |
| 3 Ctrl  |                     | 18     |            |                         |                         |                        |                     | I                            |                                             |                                        |                                       |
| 7 Ctrl  |                     | 44     | 2.10       | 5.50                    | 4.50                    | 1.00                   |                     | 1.26 F                       | 11                                          | 9                                      | 1.25                                  |
| 7 Ctrl  |                     | 46     |            |                         |                         |                        |                     | F with edema                 |                                             |                                        |                                       |
| 7 Ctrl  |                     | 48     | 1.71       | 5.30                    | 4.30                    | 1.00                   |                     | 1.15 F                       | 15.5                                        | 6                                      | 1.17                                  |
| 7 Ctrl  |                     | 49     | 1.88       | 5.25                    | 4.30                    | 0.95                   |                     | 1.30 F                       | 11                                          | 9                                      | 1.25                                  |
| 10 Ctrl |                     | 66     | 1.66       | 5.10                    | 4.15                    | 0.95                   |                     | 1.25 F                       | 10                                          | 9                                      | 1.13                                  |
| 10 Ctrl |                     | 70     | 1.82       | 5.30                    | 4.40                    | 0.90                   |                     | 1.22 F                       | 8                                           | 8                                      | 0.81                                  |
| 10 Ctrl |                     | 71     | 1.60       | 5.15                    | 4.10                    | 1.05                   |                     | 1.17 F                       | 12                                          | 9                                      | 1.36                                  |
| 11 Ctrl |                     | 73     | 1.89       | 5.30                    | 4.40                    | 0.90                   |                     | 1.27 F                       | 12                                          | 7                                      | 1.06                                  |
| 11 Ctrl |                     | 75     | 1.87       | 5.20                    | 4.30                    | 0.90                   |                     | 1.33 F                       | 15                                          | 6                                      | 1.13                                  |
| 11 Ctrl |                     | 77     | 1.47       | 5.00                    | 4.10                    | 0.90                   |                     | 1.18 F                       | 13                                          | 8                                      | 1.31                                  |
| 11 Ctrl |                     | 78     | 2.38       | 5.60                    | 4.70                    | 0.90                   |                     | 1.36 F                       | 9                                           | 6                                      | 0.68                                  |
| 11 Ctrl |                     | 79     |            |                         |                         |                        |                     | F                            |                                             |                                        |                                       |
| 13 Ctrl |                     | 89     | 1.66       | 5.10                    | 4.10                    | 1.00                   |                     | 1.25 F                       | 13                                          | 8                                      | 1.31                                  |
| 13 Ctrl |                     | 91     | 1.40       | 4.90                    | 3.95                    | 0.95                   |                     | 1.19 F                       | 12                                          | 8                                      | 1.21                                  |
| 13 Ctrl |                     | 93     | 1.46       | 5.20                    | 4.15                    | 1.05                   |                     | 1.04 F                       | 11                                          | 7                                      | 0.97                                  |
| 13 Ctrl |                     | 94     | 1.44       | 4.90                    | 4.00                    | 0.90                   |                     | 1.22 F                       | 11                                          | 11                                     | 1.52                                  |
| 16 Ctrl |                     | 110    | 2.15       | 5.60                    | 4.60                    | 1.00                   |                     | 1.22 F                       | 11                                          | 7                                      | 0.97                                  |
| 16 Ctrl |                     | 113    | 1.46       | 4.90                    | 4.10                    | 0.80                   |                     | 1.24 F                       | 14                                          | 7                                      | 1.23                                  |
| 16 Ctrl |                     | 115    | 2.32       | 5.60                    | 4.60                    | 1.00                   |                     | 1.32 F                       | 14                                          | 10                                     | 1.76                                  |
| 19 Ctrl |                     | 133    | 2.64       | 5.80                    | 4.80                    | 1.00                   |                     | 1.35 F                       | 11                                          | 7                                      | 0.97                                  |
| 19 Ctrl |                     | 135    | 2.01       | 5.15                    | 4.10                    | 1.05                   |                     | 1.47 F                       | 11                                          | 6                                      | 0.83                                  |
| 19 Ctrl |                     | 137    | 1.71       | 5.25                    | 4.25                    | 1.00                   |                     | 1.18 F                       | 15                                          | 8                                      | 1.51                                  |
| 19 Ctrl |                     | 138    | 2.80       | 5.90                    | 4.80                    | 1.10                   |                     | 1.36 F                       | 11                                          | 12.5                                   | 1.73                                  |
| 19 Ctrl |                     | 139    | 2.02       | 5.10                    | 4.15                    | 0.95                   |                     | 1.52 F                       | 11                                          | 12                                     | 1.66                                  |
| 4       |                     | 3      | 21         | 1.88                    | 5.30                    | 4.30                   | 1.00                | 1.26 F                       | 15                                          | 9                                      | 1.70                                  |
| 4       |                     | 3      | 23         | 1.86                    | 5.00                    | 4.10                   | 0.90                | 1.49 F                       | 12                                          | 7                                      | 1.06                                  |
| 4       |                     | 3      | 25         | 1.68                    | 5.20                    | 4.30                   | 0.90                | 1.19 F                       | 11                                          | 7                                      | 0.97                                  |
| 4       |                     | 3      | 26         | 1.59                    | 5.20                    | 4.30                   | 0.90                | 1.13 F                       | 10                                          | 7                                      | 0.88                                  |
| 4       |                     | 3      | 27         | 1.51                    | 4.10                    | 3.10                   | 1.00                | 2.19 F                       | 12                                          | 7                                      | 1.06                                  |

|    |     |     |      |      |      |      |              |    |    |      |
|----|-----|-----|------|------|------|------|--------------|----|----|------|
| 9  | 3   | 59  | 1.86 | 5.30 | 4.20 | 1.10 | 1.25 F       | 13 | 7  | 1.15 |
| 9  | 3   | 61  | 1.41 | 5.00 | 4.10 | 0.90 | 1.13 F       | 17 | 9  | 1.93 |
| 9  | 3   | 63  | 1.84 | 5.25 | 4.35 | 0.90 | 1.27 F       | 13 | 8  | 1.31 |
| 15 | 3   | 103 | 1.66 | 5.10 | 4.15 | 0.95 | 1.25 F       | 13 | 8  | 1.31 |
| 15 | 3   | 105 | 1.87 | 5.15 | 4.20 | 0.95 | 1.37 F       | 12 | 9  | 1.36 |
| 15 | 3   | 106 | 1.60 | 5.50 | 4.50 | 1.00 | 0.96 F       | 16 | 11 | 2.22 |
| 15 | 3   | 108 | 1.27 | 4.80 | 3.95 | 0.85 | 1.15 F       | 15 | 6  | 1.13 |
| 15 | 3   | 109 |      |      |      |      | F            |    |    |      |
| 17 | 3   | 118 |      |      |      |      | F with edema |    |    |      |
| 17 | 3   | 120 | 1.64 | 5.30 | 4.30 | 1.00 | 1.10 F       | 14 | 8  | 1.41 |
| 17 | 3   | 122 | 1.99 | 5.40 | 4.40 | 1.00 | 1.26 F       | 14 | 10 | 1.76 |
| 17 | 3   | 123 | 2.17 | 5.60 | 4.70 | 0.90 | 1.24 F       | 15 | 10 | 1.89 |
| 5  | 30  | 29  | 1.63 | 4.90 | 4.05 | 0.85 | 1.39 F       | 12 | 8  | 1.21 |
| 5  | 30  | 31  | 2.03 | 5.55 | 4.00 | 1.55 | 1.19 F       | 12 | 8  | 1.21 |
| 5  | 30  | 33  | 1.24 | 4.70 | 3.70 | 1.00 | 1.19 F       | 10 | 9  | 1.13 |
| 5  | 30  | 34  | 1.55 | 5.30 | 4.30 | 1.00 | 1.04 F       | 11 | 7  | 0.97 |
| 5  | 30  | 35  | 1.66 | 5.20 | 4.15 | 1.05 | 1.18 F       | 15 | 7  | 1.32 |
| 8  | 30  | 51  | 1.91 | 5.30 | 4.20 | 1.10 | 1.28 F       | 12 | 5  | 0.76 |
| 8  | 30  | 53  | 1.61 | 5.00 | 4.10 | 0.90 | 1.29 F       | 10 | 10 | 1.26 |
| 8  | 30  | 55  | 1.67 | 5.10 | 4.10 | 1.00 | 1.26 F       | 11 | 8  | 1.11 |
| 8  | 30  | 56  | 1.33 | 5.00 | 4.10 | 0.90 | 1.06 F       | 14 | 5  | 0.88 |
| 8  | 30  | 57  | 1.56 | 5.95 | 5.10 | 0.85 | 0.74 F       | 12 | 11 | 1.66 |
| 12 | 30  | 81  | 1.83 | 5.20 | 4.40 | 0.80 | 1.30 F       | 11 | 6  | 0.83 |
| 12 | 30  | 83  | 1.58 | 4.95 | 4.10 | 0.85 | 1.30 F       | 14 | 9  | 1.59 |
| 12 | 30  | 85  | 2.01 | 5.50 | 4.50 | 1.00 | 1.21 F       | 17 | 8  | 1.71 |
| 12 | 30  | 86  | 1.51 | 5.00 | 4.10 | 0.90 | 1.21 F       | 8  | 7  | 0.71 |
| 12 | 30  | 87  | 1.40 | 4.85 | 3.90 | 0.95 | 1.23 F       | 14 | 7  | 1.23 |
| 20 | 30  | 141 | 2.21 | 5.60 | 4.60 | 1.00 | 1.26 I       | 10 | 6  | 0.76 |
| 20 | 30  | 143 | 1.91 | 5.50 | 4.40 | 1.10 | 1.15 F       | 12 | 7  | 1.06 |
| 20 | 30  | 145 |      |      |      |      | I            |    |    |      |
| 20 | 30  | 146 | 1.72 | 5.15 | 4.20 | 0.95 | 1.26 F       | 12 | 8  | 1.21 |
| 2  | 300 | 8   | 1.65 | 5.10 | 4.15 | 0.95 | 1.24 F       | 19 | 10 | 2.39 |
| 2  | 300 | 10  | 1.43 | 4.80 | 3.85 | 0.95 | 1.29 F       | 9  | 6  | 0.68 |
| 6  | 300 | 37  | 1.67 | 5.40 | 4.50 | 0.90 | 1.06 F       | 15 | 8  | 1.51 |
| 6  | 300 | 39  | 1.81 | 5.40 | 4.40 | 1.00 | 1.15 F       | 14 | 9  | 1.59 |
| 6  | 300 | 41  | 1.73 | 5.10 | 4.20 | 0.90 | 1.30 F       | 15 | 9  | 1.70 |
| 6  | 300 | 42  | 1.65 | 5.00 | 4.20 | 0.80 | 1.32 F       | 13 | 9  | 1.47 |
| 14 | 300 | 99  | 1.37 | 4.90 | 4.00 | 0.90 | 1.16 F       | 15 | 7  | 1.32 |
| 14 | 300 | 101 | 2.08 | 5.50 | 4.50 | 1.00 | 1.25 F       | 13 | 10 | 1.64 |
| 18 | 300 | 125 | 1.95 | 5.15 | 4.15 | 1.00 | 1.43 F       | 16 | 10 | 2.02 |
| 18 | 300 | 127 | 1.51 | 5.05 | 4.05 | 1.00 | 1.17 F       | 11 | 8  | 1.11 |
| 18 | 300 | 129 | 1.84 | 5.25 | 4.25 | 1.00 | 1.27 F       | 11 | 7  | 0.97 |
| 18 | 300 | 130 | 1.37 | 5.00 | 4.00 | 1.00 | 1.10 F       | 8  | 11 | 1.11 |
| 18 | 300 | 131 | 1.72 | 5.50 | 4.50 | 1.00 | 1.03 F       | 15 | 8  | 1.51 |

Females (cont)

| Tank    | Metformin<br>(µg/L) | Fish # | Liver<br>weight<br>(mg) | Liver-<br>somatic<br>index | Gonad<br>weight (mg) | Gonado-<br>somatic<br>index | Carcass<br>weight (g) |
|---------|---------------------|--------|-------------------------|----------------------------|----------------------|-----------------------------|-----------------------|
| 1 Ctrl  |                     | 2      | 63.62                   | 2.89                       | 252.22               | 11.46                       | 1.53                  |
| 1 Ctrl  |                     | 4      | 54.52                   | 3.71                       | 182.19               | 12.39                       | 1.00                  |
| 1 Ctrl  |                     | 6      | 81.92                   | 5.39                       | 182.94               | 12.04                       | 1.04                  |
| 3 Ctrl  |                     | 13     | 74.89                   | 4.71                       | 167.70               | 10.55                       | 1.07                  |
| 3 Ctrl  |                     | 16     |                         |                            |                      |                             |                       |
| 3 Ctrl  |                     | 18     |                         |                            |                      |                             |                       |
| 7 Ctrl  |                     | 44     | 108.90                  | 5.19                       | 263.80               | 12.56                       | 1.39                  |
| 7 Ctrl  |                     | 46     |                         |                            |                      |                             |                       |
| 7 Ctrl  |                     | 48     | 35.60                   | 2.08                       | 129.44               | 7.57                        | 1.25                  |
| 7 Ctrl  |                     | 49     | 73.25                   | 3.90                       | 350.64               | 18.65                       | 1.22                  |
| 10 Ctrl |                     | 66     | 54.46                   | 3.28                       | 219.48               | 13.22                       | 1.13                  |
| 10 Ctrl |                     | 70     | 71.92                   | 3.95                       | 173.18               | 9.52                        | 1.29                  |
| 10 Ctrl |                     | 71     | 66.73                   | 4.17                       | 199.10               | 12.44                       | 1.07                  |
| 11 Ctrl |                     | 73     | 47.04                   | 2.49                       | 268.94               | 14.23                       | 1.31                  |
| 11 Ctrl |                     | 75     | 72.84                   | 3.90                       | 379.15               | 20.28                       | 1.16                  |
| 11 Ctrl |                     | 77     | 51.78                   | 3.52                       | 201.27               | 13.69                       | 0.99                  |
| 11 Ctrl |                     | 78     | 98.85                   | 4.15                       | 256.42               | 10.77                       | 1.57                  |
| 11 Ctrl |                     | 79     |                         |                            |                      |                             | Lost to water bath    |
| 13 Ctrl |                     | 89     | 67.14                   | 4.04                       | 172.64               | 10.40                       | 1.19                  |
| 13 Ctrl |                     | 91     | 67.04                   | 4.79                       | 135.70               | 9.69                        | 0.98                  |
| 13 Ctrl |                     | 93     | 60.82                   | 4.17                       | 134.33               | 9.20                        | 1.07                  |
| 13 Ctrl |                     | 94     | 67.63                   | 4.70                       | 141.62               | 9.83                        | 1.01                  |
| 16 Ctrl |                     | 110    | 63.95                   | 2.97                       | 319.01               | 14.84                       | 1.43                  |
| 16 Ctrl |                     | 113    | 43.42                   | 2.97                       | 200.60               | 13.74                       | 1.02                  |
| 16 Ctrl |                     | 115    | 86.86                   | 3.74                       | 411.81               | 17.75                       | 1.54                  |
| 19 Ctrl |                     | 133    | 69.22                   | 2.62                       | 537.56               | 20.36                       | 1.62                  |
| 19 Ctrl |                     | 135    | 48.95                   | 2.44                       | 470.69               | 23.42                       | 1.20                  |
| 19 Ctrl |                     | 137    | 55.00                   | 3.22                       | 368.70               | 21.56                       | 1.11                  |
| 19 Ctrl |                     | 138    | 106.26                  | 3.80                       | 264.82               | 9.46                        | 1.85                  |
| 19 Ctrl |                     | 139    | 72.41                   | 3.58                       | 488.30               | 24.17                       | 1.20                  |
| 4       |                     | 3      | 21                      | 28.18                      | 1.50                 | 282.30                      | 15.02                 |
| 4       |                     | 3      | 23                      | 68.90                      | 3.70                 | 294.60                      | 15.84                 |
| 4       |                     | 3      | 25                      | 58.20                      | 3.46                 | 235.20                      | 14.00                 |
| 4       |                     | 3      | 26                      | 59.27                      | 3.73                 | 240.69                      | 15.14                 |
| 4       |                     | 3      | 27                      | 77.51                      | 5.13                 | 297.70                      | 19.72                 |
| 9       |                     | 3      | 59                      | 54.22                      | 2.92                 | 380.68                      | 20.47                 |
| 9       |                     | 3      | 61                      | 43.37                      | 3.08                 | 264.10                      | 18.73                 |
| 9       |                     | 3      | 63                      | 48.65                      | 2.64                 | 207.95                      | 11.30                 |
| 15      |                     | 3      | 103                     | 68.17                      | 4.11                 | 273.97                      | 16.50                 |
| 15      |                     | 3      | 105                     | 54.51                      | 2.91                 | 304.50                      | 16.28                 |
| 15      |                     | 3      | 106                     | 64.70                      | 4.04                 | 261.20                      | 16.33                 |
| 15      |                     | 3      | 108                     | 48.62                      | 3.83                 | 122.33                      | 9.63                  |
| 15      |                     | 3      | 109                     |                            |                      |                             | Lost to water bath    |

|    |     |     |        |      |        |       |                        |
|----|-----|-----|--------|------|--------|-------|------------------------|
| 17 | 3   | 118 |        |      |        |       |                        |
| 17 | 3   | 120 | 61.78  | 3.77 | 184.88 | 11.27 | 1.19                   |
| 17 | 3   | 122 | 96.53  | 4.85 | 313.70 | 15.76 | 1.29                   |
| 17 | 3   | 123 | 65.21  | 3.01 | 299.96 | 13.82 | 1.47                   |
| 5  | 30  | 29  | 54.50  | 3.34 | 230.17 | 14.12 | 1.09                   |
| 5  | 30  | 31  | 36.84  | 1.81 | 300.18 | 14.79 | 1.41                   |
| 5  | 30  | 33  | 31.15  | 2.51 | 172.31 | 13.90 | 0.86                   |
| 5  | 30  | 34  | 65.67  | 4.24 | 184.82 | 11.92 | 1.05                   |
| 5  | 30  | 35  | 33.72  | 2.03 | 168.20 | 10.13 | 1.61                   |
| 8  | 30  | 51  | 49.41  | 2.59 | 232.75 | 12.19 | 1.32                   |
| 8  | 30  | 53  | 64.61  | 4.01 | 287.31 | 17.85 | 1.05                   |
| 8  | 30  | 55  | 89.12  | 5.34 | 223.65 | 13.39 | 1.10                   |
| 8  | 30  | 56  | 53.40  | 4.02 | 196.12 | 14.75 | 0.86                   |
| 8  | 30  | 57  | 69.35  | 4.45 | 153.99 | 9.87  | 1.01                   |
| 12 | 30  | 81  | 55.96  | 3.06 | 382.90 | 20.92 | 1.08                   |
| 12 | 30  | 83  | 42.89  | 2.71 | 152.05 | 9.62  | 1.07                   |
| 12 | 30  | 85  | 81.06  | 4.03 | 226.75 | 11.28 | 1.39                   |
| 12 | 30  | 86  | 41.56  | 2.75 | 147.25 | 9.75  | 1.11                   |
| 12 | 30  | 87  | 46.50  | 3.32 | 248.91 | 17.78 | 0.91                   |
| 20 | 30  | 141 | 55.00  | 2.49 | 104.77 | 4.74  | 1.70                   |
| 20 | 30  | 143 | 85.54  | 4.48 | 311.65 | 16.32 | 1.24                   |
| 20 | 30  | 145 |        |      |        |       | underdeveloped ovaries |
| 20 | 30  | 146 | 66.64  | 3.87 | 314.34 | 18.28 | 1.08                   |
| 2  | 300 | 8   | 49.90  | 3.02 | 241.55 | 14.64 | 1.10                   |
| 2  | 300 | 10  | 59.30  | 4.15 | 311.20 | 21.76 | 0.88                   |
| 6  | 300 | 37  | 37.85  | 2.27 | 251.90 | 15.08 | 1.16                   |
| 6  | 300 | 39  | 81.52  | 4.50 | 309.06 | 17.08 | 1.21                   |
| 6  | 300 | 41  | 74.20  | 4.29 | 278.08 | 16.07 | 1.12                   |
| 6  | 300 | 42  | 88.35  | 5.35 | 280.15 | 16.98 | 1.04                   |
| 14 | 300 | 99  | 37.38  | 2.73 | 259.60 | 18.95 | 0.88                   |
| 14 | 300 | 101 | 103.72 | 4.99 | 311.63 | 14.98 | 1.36                   |
| 18 | 300 | 125 | 65.36  | 3.35 | 431.26 | 22.12 | 1.18                   |
| 18 | 300 | 127 | 52.69  | 3.49 | 242.05 | 16.03 | 0.98                   |
| 18 | 300 | 129 | 79.03  | 4.30 | 222.00 | 12.07 | 1.22                   |
| 18 | 300 | 130 | 55.54  | 4.05 | 150.57 | 10.99 | 0.96                   |
| 18 | 300 | 131 | 64.65  | 3.76 | 211.17 | 12.28 | 1.22                   |
