# Supplementary material for: Fathead minnow exposed to environmentally relevant concentrations of metformin for one life cycle show no adverse effects
Source: Atypon-hosted journal article supplement (doi:10.1139/facets-2020-0106), 2021-01-01
Supplement: facets-2020-0106_supplement4.pdf [file facets-2020-0106_supplement4.pdf]

**Average number of Females over time**

**29.46** in 8 tanks for controls                      Ctrl = Controls

**16.58** in 4 tanks for 3 ug/L metformin

**17.28** in 4 tanks for 31 ug/L metformin

**12.82** in 4 tanks for 322 ug/L metformin

| Date       | Dph | Tank    | Metfor-<br>min<br>(µg/L) | # Good<br>eggs | # Unfertil-<br>ized eggs | # Dead<br>eggs | # Mutant<br>eggs | Total #<br>eggs | # Broken<br>eggs | # eggs in<br>cup | Cumula-<br>tive #<br>eggs | Cumula-<br>tive eggs<br>per F |
|------------|-----|---------|--------------------------|----------------|--------------------------|----------------|------------------|-----------------|------------------|------------------|---------------------------|-------------------------------|
| 2018-08-25 | 89  | 7 Ctrl  |                          | 17             | 1                        | 0              | 5                | 26              | 3                | 0                | 26                        | 1                             |
| 2018-08-26 | 90  |         |                          |                |                          |                |                  |                 |                  |                  | 26                        | 1                             |
| 2018-08-27 | 91  | 3 Ctrl  |                          | 1              | 0                        | 1              | 12               | 38              | 24               | 0                | 64                        | 2                             |
| 2018-08-29 | 93  |         |                          |                |                          |                |                  |                 |                  |                  | 64                        | 2                             |
| 2018-08-31 | 95  | 3 Ctrl  |                          | 64             | 0                        | 37             | 22               | 147             | 24               | 0                | 211                       | 7                             |
| 2018-09-01 | 96  | 10 Ctrl |                          | 35             | 0                        | 0              | 31               | 66              | 0                | 0                | 277                       | 9                             |
| 2018-09-02 | 97  | 13 Ctrl |                          | 11             | 2                        | 0              | 11               | 24              | 0                | 0                | 301                       | 10                            |
| 2018-09-03 | 98  | 16 Ctrl |                          | 15             | 1                        | 0              | 10               | 26              | 0                | 0                | 327                       | 11                            |
| 2018-09-05 | 100 | 1 Ctrl  |                          | 6              | 14                       | 0              | 0                | 20              | 0                | 0                | 347                       | 12                            |
| 2018-09-05 | 100 | 19 Ctrl |                          | 0              | 12                       | 2              | 0                | 31              | 17               | 0                | 378                       | 13                            |
| 2018-09-05 | 100 | 13 Ctrl |                          | 69             | 13                       | 15             | 46               | 154             | 11               | 69               | 532                       | 18                            |
| 2018-09-05 | 100 | 3 Ctrl  |                          | 19             | 0                        | 0              | 2                | 21              | 0                | 0                | 553                       | 19                            |
| 2018-09-05 | 100 | 1 Ctrl  |                          | 70             | 5                        | 0              | 0                | 79              | 4                | 70               | 632                       | 21                            |
| 2018-09-05 | 100 | 13 Ctrl |                          | 2              | 0                        | 2              | 0                | 4               | 0                | 0                | 636                       | 22                            |
| 2018-09-06 | 101 | 19 Ctrl |                          | 18             | 9                        | 1              | 1                | 31              | 2                | 0                | 667                       | 23                            |
| 2018-09-06 | 101 | 16 Ctrl |                          | 187            | 11                       | 9              | 31               | 245             | 7                | 100              | 912                       | 31                            |
| 2018-09-06 | 101 | 13 Ctrl |                          | 592            | 7                        | 24             | 76               | 699             | 0                | 100              | 1611                      | 55                            |
| 2018-09-06 | 101 | 7 Ctrl  |                          | 131            | 0                        | 2              | 2                | 135             | 0                | 100              | 1746                      | 59                            |
| 2018-09-07 | 102 | 16 Ctrl |                          | 376            | 6                        | 10             | 24               | 429             | 13               | 100              | 2175                      | 74                            |
| 2018-09-07 | 102 | 19 Ctrl |                          | 8              | 1                        | 0              | 2                | 15              | 4                | 0                | 2190                      | 74                            |
| 2018-09-07 | 102 | 19 Ctrl |                          | 187            | 40                       | 9              | 41               | 281             | 4                | 100              | 2471                      | 84                            |
| 2018-09-07 | 102 | 10 Ctrl |                          | 91             | 7                        | 0              | 0                | 99              | 1                | 91               | 2570                      | 87                            |
| 2018-09-08 | 103 | 19 Ctrl |                          | 210            | 54                       | 7              | 114              | 408             | 23               | 100              | 2978                      | 101                           |
| 2018-09-08 | 103 | 13 Ctrl |                          | 178            | 1                        | 0              | 7                | 186             | 0                | 100              | 3164                      | 107                           |
| 2018-09-08 | 103 | 10 Ctrl |                          | 111            | 11                       | 1              | 2                | 135             | 10               | 100              | 3299                      | 112                           |
| 2018-09-08 | 103 | 7 Ctrl  |                          | 14             | 1                        | 0              | 2                | 17              | 0                | 0                | 3316                      | 113                           |
| 2018-09-09 | 104 | 16 Ctrl |                          | 50             | 0                        | 1              | 25               | 77              | 1                | 50               | 3393                      | 115                           |
| 2018-09-09 | 104 | 16 Ctrl |                          | 4              | 1                        | 0              | 0                | 5               | 0                | 0                | 3398                      | 115                           |
| 2018-09-09 | 104 | 10 Ctrl |                          | 41             | 2                        | 6              | 1                | 53              | 3                | 0                | 3451                      | 117                           |
| 2018-09-09 | 104 | 3 Ctrl  |                          | 94             | 0                        | 48             | 40               | 255             | 73               | 93               | 3706                      | 126                           |
| 2018-09-10 | 105 | 13 Ctrl |                          | 335            | 1                        | 2              | 7                | 360             | 15               | 100              | 4066                      | 138                           |
| 2018-09-11 | 106 | 13 Ctrl |                          | 200            | 8                        | 18             | 30               | 321             | 65               | 100              | 4387                      | 149                           |
| 2018-09-12 | 107 | 11 Ctrl |                          | 260            | 2                        | 2              | 0                | 264             | 0                | 100              | 4651                      | 158                           |
| 2018-09-13 | 108 | 16 Ctrl |                          | 155            | 1                        | 11             | 4                | 175             | 4                | 100              | 4826                      | 164                           |
| 2018-09-13 | 108 | 16 Ctrl |                          | 4              | 0                        | 0              | 0                | 4               | 0                | 0                | 4830                      | 164                           |
| 2018-09-13 | 108 | 13 Ctrl |                          | 2              | 0                        | 0              | 0                | 4               | 2                | 0                | 4834                      | 164                           |
| 2018-09-13 | 108 | 11 Ctrl |                          | 230            | 16                       | 15             | 12               | 279             | 6                | 100              | 5113                      | 174                           |

|            |     |         |     |    |    |    |     |    |     |       |     |
|------------|-----|---------|-----|----|----|----|-----|----|-----|-------|-----|
| 2018-09-13 | 108 | 7 Ctrl  | 3   | 7  | 1  | 9  | 20  | 0  | 0   | 5133  | 174 |
| 2018-09-14 | 109 | 10 Ctrl | 125 | 9  | 6  | 7  | 164 | 17 | 100 | 5297  | 180 |
| 2018-09-14 | 109 | 7 Ctrl  | 247 | 5  | 22 | 8  | 322 | 40 | 100 | 5619  | 191 |
| 2018-09-14 | 109 | 19 Ctrl | 222 | 22 | 18 | 35 | 348 | 51 | 100 | 5967  | 203 |
| 2018-09-14 | 109 | 3 Ctrl  | 144 | 0  | 7  | 11 | 183 | 21 | 100 | 6150  | 209 |
| 2018-09-15 | 110 | 13 Ctrl | 174 | 1  | 13 | 12 | 200 | 0  | 100 | 6350  | 216 |
| 2018-09-15 | 110 | 13 Ctrl | 338 | 2  | 24 | 14 | 378 | 0  | 100 | 6728  | 228 |
| 2018-09-15 | 110 | 19 Ctrl | 340 | 40 | 6  | 5  | 398 | 7  | 100 | 7126  | 242 |
| 2018-09-15 | 110 | 19 Ctrl | 423 | 6  | 8  | 70 | 512 | 5  | 100 | 7638  | 259 |
| 2018-09-15 | 110 | 7 Ctrl  | 95  | 0  | 37 | 16 | 151 | 3  | 95  | 7789  | 264 |
| 2018-09-16 | 111 | 7 Ctrl  | 95  | 2  | 4  | 2  | 103 | 0  | 95  | 7892  | 268 |
| 2018-09-16 | 111 | 7 Ctrl  | 3   | 0  | 0  | 0  | 3   | 0  | 0   | 7895  | 268 |
| 2018-09-16 | 111 | 1 Ctrl  | 108 | 26 | 5  | 6  | 150 | 5  | 100 | 8045  | 273 |
| 2018-09-16 | 111 | 19 Ctrl | 2   | 0  | 1  | 0  | 3   | 0  | 0   | 8048  | 273 |
| 2018-09-16 | 111 | 16 Ctrl | 252 | 0  | 13 | 2  | 279 | 12 | 100 | 8327  | 283 |
| 2018-09-16 | 111 | 13 Ctrl | 190 | 0  | 9  | 27 | 231 | 5  | 100 | 8558  | 291 |
| 2018-09-17 | 112 | 19 Ctrl | 20  | 43 | 3  | 0  | 94  | 28 | 0   | 8652  | 294 |
| 2018-09-17 | 112 | 19 Ctrl | 2   | 2  | 0  | 0  | 4   | 0  | 0   | 8656  | 294 |
| 2018-09-17 | 112 | 16 Ctrl | 1   | 0  | 0  | 0  | 1   | 0  | 0   | 8657  | 294 |
| 2018-09-17 | 112 | 7 Ctrl  | 335 | 8  | 7  | 27 | 387 | 10 | 100 | 9044  | 307 |
| 2018-09-18 | 113 | 19 Ctrl | 9   | 0  | 0  | 0  | 9   | 0  | 0   | 9053  | 307 |
| 2018-09-18 | 113 | 19 Ctrl | 350 | 68 | 15 | 22 | 481 | 26 | 100 | 9534  | 324 |
| 2018-09-18 | 113 | 19 Ctrl | 227 | 26 | 3  | 11 | 278 | 11 | 100 | 9812  | 333 |
| 2018-09-18 | 113 | 13 Ctrl | 60  | 1  | 1  | 1  | 74  | 11 | 60  | 9886  | 336 |
| 2018-09-18 | 113 | 11 Ctrl | 293 | 4  | 5  | 14 | 345 | 29 | 100 | 10231 | 347 |
| 2018-09-18 | 113 | 3 Ctrl  | 96  | 1  | 17 | 37 | 162 | 11 | 94  | 10393 | 353 |
| 2018-09-18 | 113 | 10 Ctrl | 137 | 3  | 9  | 1  | 150 | 0  | 100 | 10543 | 358 |
| 2018-09-19 | 114 | 16 Ctrl | 88  | 1  | 3  | 5  | 99  | 2  | 86  | 10642 | 361 |
| 2018-09-19 | 114 | 7 Ctrl  | 232 | 0  | 3  | 7  | 251 | 9  | 100 | 10893 | 370 |
| 2018-09-19 | 114 | 13 Ctrl | 447 | 1  | 4  | 9  | 470 | 9  | 100 | 11363 | 386 |
| 2018-09-19 | 114 | 11 Ctrl | 46  | 2  | 0  | 0  | 51  | 3  | 0   | 11414 | 387 |
| 2018-09-19 | 114 | 10 Ctrl | 12  | 1  | 1  | 0  | 15  | 1  | 0   | 11429 | 388 |
| 2018-09-19 | 114 | 16 Ctrl | 22  | 0  | 0  | 1  | 23  | 0  | 0   | 11452 | 389 |
| 2018-09-19 | 114 | 10 Ctrl | 234 | 2  | 1  | 11 | 248 | 0  | 100 | 11700 | 397 |
| 2018-09-20 | 115 | 13 Ctrl | 249 | 13 | 1  | 3  | 266 | 0  | 100 | 11966 | 406 |
| 2018-09-20 | 115 | 11 Ctrl | 170 | 2  | 2  | 0  | 184 | 10 | 100 | 12150 | 412 |
| 2018-09-20 | 115 | 1 Ctrl  | 69  | 17 | 8  | 2  | 98  | 2  | 69  | 12248 | 416 |
| 2018-09-20 | 115 | 19 Ctrl | 4   | 0  | 0  | 0  | 4   | 0  | 0   | 12252 | 416 |
| 2018-09-20 | 115 | 19 Ctrl | 254 | 17 | 16 | 11 | 298 | 0  | 100 | 12550 | 426 |
| 2018-09-20 | 115 | 7 Ctrl  | 17  | 1  | 1  | 8  | 29  | 2  | 0   | 12579 | 427 |
| 2018-09-21 | 116 | 3 Ctrl  | 143 | 1  | 34 | 9  | 229 | 42 | 100 | 12808 | 435 |
| 2018-09-22 | 117 | 19 Ctrl | 74  | 5  | 0  | 33 | 137 | 25 | 74  | 12945 | 439 |
| 2018-09-22 | 117 | 16 Ctrl | 159 | 5  | 9  | 63 | 252 | 16 | 100 | 13197 | 448 |
| 2018-09-22 | 117 | 13 Ctrl | 167 | 6  | 20 | 75 | 273 | 5  | 100 | 13470 | 457 |
| 2018-09-22 | 117 | 10 Ctrl | 112 | 2  | 8  | 36 | 166 | 8  | 100 | 13636 | 463 |
| 2018-09-22 | 117 | 1 Ctrl  | 69  | 1  | 14 | 39 | 146 | 23 | 69  | 13782 | 468 |
| 2018-09-23 | 118 | 16 Ctrl | 4   | 0  | 0  | 1  | 10  | 5  | 0   | 13792 | 468 |

|            |     |         |     |    |    |    |     |     |     |       |     |
|------------|-----|---------|-----|----|----|----|-----|-----|-----|-------|-----|
| 2018-09-23 | 118 | 13 Ctrl | 152 | 3  | 0  | 2  | 195 | 38  | 100 | 13987 | 475 |
| 2018-09-23 | 118 | 11 Ctrl | 190 | 5  | 24 | 62 | 301 | 20  | 100 | 14288 | 485 |
| 2018-09-23 | 118 | 10 Ctrl | 1   | 0  | 0  | 0  | 1   | 0   | 0   | 14289 | 485 |
| 2018-09-23 | 118 | 1 Ctrl  | 62  | 4  | 1  | 91 | 160 | 2   | 62  | 14449 | 491 |
| 2018-09-23 | 118 | 19 Ctrl | 3   | 0  | 0  | 0  | 3   | 0   | 0   | 14452 | 491 |
| 2018-09-23 | 118 | 19 Ctrl | 1   | 0  | 0  | 0  | 1   | 0   | 0   | 14453 | 491 |
| 2018-09-23 | 118 | 19 Ctrl | 268 | 81 | 20 | 19 | 388 | 0   | 100 | 14841 | 504 |
| 2018-09-24 | 119 | 13 Ctrl | 336 | 28 | 19 | 26 | 490 | 81  | 100 | 15331 | 520 |
| 2018-09-24 | 119 | 7 Ctrl  | 248 | 9  | 14 | 32 | 320 | 17  | 100 | 15651 | 531 |
| 2018-09-24 | 119 | 1 Ctrl  | 78  | 0  | 4  | 0  | 83  | 1   | 78  | 15734 | 534 |
| 2018-09-25 | 120 | 13 Ctrl | 67  | 0  | 0  | 0  | 67  | 0   | 67  | 15801 | 536 |
| 2018-09-25 | 120 | 11 Ctrl | 234 | 8  | 3  | 42 | 293 | 6   | 100 | 16094 | 546 |
| 2018-09-25 | 120 | 7 Ctrl  | 168 | 0  | 0  | 4  | 172 | 0   | 100 | 16266 | 552 |
| 2018-09-25 | 120 | 3 Ctrl  | 74  | 2  | 26 | 20 | 130 | 8   | 74  | 16396 | 557 |
| 2018-09-25 | 120 | 1 Ctrl  | 170 | 1  | 9  | 21 | 207 | 6   | 100 | 16603 | 564 |
| 2018-09-25 | 120 | 16 Ctrl | 153 | 8  | 0  | 9  | 170 | 0   | 100 | 16773 | 569 |
| 2018-09-26 | 121 | 19 Ctrl | 0   | 1  | 0  | 0  | 4   | 3   | 0   | 16777 | 570 |
| 2018-09-26 | 121 | 13 Ctrl | 348 | 3  | 2  | 9  | 370 | 8   | 100 | 17147 | 582 |
| 2018-09-26 | 121 | 11 Ctrl | 206 | 4  | 1  | 3  | 220 | 6   | 100 | 17367 | 590 |
| 2018-09-26 | 121 | 7 Ctrl  | 112 | 0  | 4  | 5  | 126 | 5   | 100 | 17493 | 594 |
| 2018-09-26 | 121 | 7 Ctrl  | 66  | 0  | 2  | 4  | 73  | 1   | 66  | 17566 | 596 |
| 2018-09-27 | 122 | 10 Ctrl | 281 | 1  | 0  | 1  | 283 | 0   | 100 | 17849 | 606 |
| 2018-09-27 | 122 | 11 Ctrl | 521 | 10 | 10 | 0  | 541 | 0   | 100 | 18390 | 624 |
| 2018-09-27 | 122 | 19 Ctrl | 2   | 0  | 0  | 0  | 2   | 0   | 0   | 18392 | 624 |
| 2018-09-27 | 122 | 19 Ctrl | 267 | 41 | 16 | 21 | 345 | 0   | 100 | 18737 | 636 |
| 2018-09-28 | 123 | 10 Ctrl | 7   | 0  | 0  | 0  | 7   | 0   | 0   | 18744 | 636 |
| 2018-09-28 | 123 | 7 Ctrl  | 185 | 1  | 2  | 14 | 228 | 26  | 100 | 18972 | 644 |
| 2018-09-28 | 123 | 7 Ctrl  | 283 | 3  | 7  | 9  | 325 | 23  | 100 | 19297 | 655 |
| 2018-09-28 | 123 | 3 Ctrl  | 136 | 1  | 22 | 13 | 225 | 53  | 100 | 19522 | 663 |
| 2018-09-28 | 123 | 1 Ctrl  | 262 | 3  | 1  | 5  | 275 | 4   | 100 | 19797 | 672 |
| 2018-09-28 | 123 | 13 Ctrl | 195 | 8  | 27 | 32 | 394 | 132 | 100 | 20191 | 685 |
| 2018-09-28 | 123 | 13 Ctrl | 2   | 0  | 0  | 0  | 6   | 4   | 0   | 20197 | 686 |
| 2018-09-28 | 123 | 11 Ctrl | 258 | 6  | 2  | 18 | 291 | 7   | 100 | 20488 | 696 |
| 2018-09-28 | 123 | 11 Ctrl | 5   | 0  | 0  | 0  | 5   | 0   | 0   | 20493 | 696 |
| 2018-09-28 | 123 | 19 Ctrl | 338 | 25 | 0  | 6  | 378 | 9   | 100 | 20871 | 709 |
| 2018-09-29 | 124 | 1 Ctrl  | 110 | 1  | 2  | 13 | 134 | 8   | 100 | 21005 | 713 |
| 2018-09-29 | 124 | 10 Ctrl | 143 | 0  | 2  | 0  | 145 | 0   | 100 | 21150 | 718 |
| 2018-09-29 | 124 | 7 Ctrl  | 81  | 3  | 6  | 4  | 96  | 2   | 81  | 21246 | 721 |
| 2018-09-29 | 124 | 7 Ctrl  | 52  | 3  | 7  | 0  | 63  | 1   | 52  | 21309 | 723 |
| 2018-09-29 | 124 | 11 Ctrl | 144 | 23 | 0  | 1  | 168 | 0   | 100 | 21477 | 729 |
| 2018-09-29 | 124 | 11 Ctrl | 1   | 1  | 0  | 0  | 2   | 0   | 0   | 21479 | 729 |
| 2018-09-29 | 124 | 13 Ctrl | 501 | 12 | 10 | 27 | 550 | 0   | 100 | 22029 | 748 |
| 2018-09-29 | 124 | 16 Ctrl | 3   | 0  | 0  | 0  | 3   | 0   | 0   | 22032 | 748 |
| 2018-09-29 | 124 | 19 Ctrl | 106 | 8  | 4  | 13 | 150 | 19  | 100 | 22182 | 753 |
| 2018-09-29 | 124 | 19 Ctrl | 82  | 39 | 0  | 2  | 131 | 8   | 82  | 22313 | 758 |
| 2018-09-30 | 125 | 11 Ctrl | 422 | 4  | 6  | 11 | 447 | 4   | 100 | 22760 | 773 |
| 2018-09-30 | 125 | 11 Ctrl | 181 | 1  | 3  | 4  | 197 | 8   | 100 | 22957 | 779 |

|            |     |         |     |    |     |     |     |     |     |       |      |
|------------|-----|---------|-----|----|-----|-----|-----|-----|-----|-------|------|
| 2018-09-30 | 125 | 10 Ctrl | 239 | 5  | 1   | 17  | 301 | 39  | 100 | 23258 | 790  |
| 2018-09-30 | 125 | 19 Ctrl | 8   | 1  | 0   | 0   | 9   | 0   | 0   | 23267 | 790  |
| 2018-09-30 | 125 | 19 Ctrl | 200 | 35 | 32  | 1   | 273 | 5   | 100 | 23540 | 799  |
| 2018-09-30 | 125 | 19 Ctrl | 3   | 1  | 3   | 0   | 14  | 7   | 0   | 23554 | 800  |
| 2018-10-01 | 126 | 10 Ctrl | 199 | 4  | 33  | 32  | 268 | 0   | 100 | 23822 | 809  |
| 2018-10-01 | 126 | 7 Ctrl  | 70  | 0  | 3   | 2   | 75  | 0   | 70  | 23897 | 811  |
| 2018-10-01 | 126 | 7 Ctrl  | 194 | 6  | 51  | 63  | 349 | 35  | 100 | 24246 | 823  |
| 2018-10-01 | 126 | 11 Ctrl | 158 | 3  | 24  | 119 | 367 | 63  | 100 | 24613 | 836  |
| 2018-10-01 | 126 | 3 Ctrl  | 33  | 2  | 18  | 87  | 272 | 132 | 0   | 24885 | 845  |
| 2018-10-02 | 127 | 19 Ctrl | 225 | 28 | 7   | 34  | 294 | 0   | 100 | 25179 | 855  |
| 2018-10-02 | 127 | 10 Ctrl | 2   | 1  | 0   | 0   | 5   | 2   | 0   | 25184 | 855  |
| 2018-10-02 | 127 | 10 Ctrl | 93  | 1  | 11  | 40  | 177 | 32  | 93  | 25361 | 861  |
| 2018-10-02 | 127 | 7 Ctrl  | 3   | 0  | 1   | 0   | 4   | 0   | 0   | 25365 | 861  |
| 2018-10-02 | 127 | 7 Ctrl  | 3   | 0  | 0   | 1   | 5   | 1   | 0   | 25370 | 861  |
| 2018-10-02 | 127 | 13 Ctrl | 0   | 1  | 0   | 2   | 6   | 3   | 0   | 25376 | 861  |
| 2018-10-02 | 127 | 13 Ctrl | 301 | 23 | 178 | 176 | 805 | 127 | 100 | 26181 | 889  |
| 2018-10-02 | 127 | 11 Ctrl | 15  | 9  | 20  | 50  | 112 | 18  | 0   | 26293 | 893  |
| 2018-10-02 | 127 | 11 Ctrl | 26  | 5  | 2   | 32  | 77  | 12  | 0   | 26370 | 895  |
| 2018-10-03 | 128 | 19 Ctrl | 139 | 36 | 2   | 5   | 198 | 16  | 100 | 26568 | 902  |
| 2018-10-03 | 128 | 19 Ctrl | 42  | 59 | 2   | 5   | 142 | 34  | 0   | 26710 | 907  |
| 2018-10-03 | 128 | 16 Ctrl | 5   | 0  | 0   | 0   | 5   | 0   | 0   | 26715 | 907  |
| 2018-10-03 | 128 | 16 Ctrl | 67  | 0  | 1   | 0   | 68  | 0   | 67  | 26783 | 909  |
| 2018-10-03 | 128 | 13 Ctrl | 277 | 16 | 2   | 19  | 321 | 7   | 100 | 27104 | 920  |
| 2018-10-03 | 128 | 11 Ctrl | 16  | 4  | 4   | 11  | 41  | 6   | 0   | 27145 | 922  |
| 2018-10-03 | 128 | 11 Ctrl | 95  | 4  | 3   | 29  | 134 | 3   | 95  | 27279 | 926  |
| 2018-10-03 | 128 | 1 Ctrl  | 147 | 1  | 9   | 0   | 157 | 0   | 100 | 27436 | 931  |
| 2018-10-03 | 128 | 1 Ctrl  | 2   | 0  | 1   | 0   | 3   | 0   | 0   | 27439 | 932  |
| 2018-10-03 | 128 | 19 Ctrl | 325 | 13 | 1   | 51  | 426 | 36  | 100 | 27865 | 946  |
| 2018-10-04 | 129 | 11 Ctrl | 133 | 20 | 30  | 55  | 324 | 86  | 100 | 28189 | 957  |
| 2018-10-04 | 129 | 19 Ctrl | 16  | 2  | 1   | 4   | 23  | 0   | 0   | 28212 | 958  |
| 2018-10-04 | 129 | 3 Ctrl  | 146 | 2  | 26  | 42  | 267 | 51  | 100 | 28479 | 967  |
| 2018-10-04 | 129 | 19 Ctrl | 152 | 62 | 60  | 75  | 384 | 35  | 100 | 28863 | 980  |
| 2018-10-04 | 129 | 10 Ctrl | 7   | 1  | 1   | 5   | 14  | 0   | 0   | 28877 | 980  |
| 2018-10-04 | 129 | 10 Ctrl | 102 | 4  | 21  | 17  | 154 | 10  | 100 | 29031 | 986  |
| 2018-10-04 | 129 | 7 Ctrl  | 4   | 1  | 0   | 0   | 5   | 0   | 0   | 29036 | 986  |
| 2018-10-05 | 130 | 16 Ctrl | 133 | 1  | 11  | 49  | 205 | 11  | 100 | 29241 | 993  |
| 2018-10-05 | 130 | 13 Ctrl | 95  | 2  | 56  | 64  | 276 | 59  | 95  | 29517 | 1002 |
| 2018-10-05 | 130 | 7 Ctrl  | 6   | 0  | 0   | 0   | 7   | 1   | 0   | 29524 | 1002 |
| 2018-10-05 | 130 | 7 Ctrl  | 183 | 9  | 33  | 52  | 286 | 9   | 100 | 29810 | 1012 |
| 2018-10-06 | 131 | 16 Ctrl | 286 | 12 | 81  | 205 | 616 | 32  | 100 | 30426 | 1033 |
| 2018-10-06 | 131 | 16 Ctrl | 1   | 0  | 0   | 0   | 1   | 0   | 0   | 30427 | 1033 |
| 2018-10-06 | 131 | 13 Ctrl | 152 | 0  | 25  | 56  | 261 | 28  | 100 | 30688 | 1042 |
| 2018-10-06 | 131 | 13 Ctrl | 197 | 8  | 42  | 78  | 397 | 72  | 100 | 31085 | 1055 |
| 2018-10-06 | 131 | 7 Ctrl  | 1   | 0  | 0   | 0   | 1   | 0   | 0   | 31086 | 1055 |
| 2018-10-06 | 131 | 1 Ctrl  | 5   | 2  | 0   | 0   | 8   | 1   | 0   | 31094 | 1056 |
| 2018-10-06 | 131 | 19 Ctrl | 14  | 2  | 1   | 13  | 38  | 8   | 0   | 31132 | 1057 |
| 2018-10-06 | 131 | 19 Ctrl | 25  | 37 | 6   | 48  | 131 | 15  | 0   | 31263 | 1061 |

|            |     |         |     |    |     |     |      |     |     |       |      |
|------------|-----|---------|-----|----|-----|-----|------|-----|-----|-------|------|
| 2018-10-07 | 132 | 11 Ctrl | 21  | 0  | 20  | 23  | 68   | 4   | 0   | 31331 | 1064 |
| 2018-10-07 | 132 | 7 Ctrl  | 71  | 0  | 13  | 14  | 98   | 0   | 70  | 31429 | 1067 |
| 2018-10-07 | 132 | 7 Ctrl  | 76  | 0  | 4   | 6   | 91   | 5   | 76  | 31520 | 1070 |
| 2018-10-07 | 132 | 3 Ctrl  | 55  | 1  | 42  | 43  | 213  | 72  | 55  | 31733 | 1077 |
| 2018-10-07 | 132 | 1 Ctrl  | 44  | 0  | 50  | 36  | 233  | 103 | 0   | 31966 | 1085 |
| 2018-10-07 | 132 | 19 Ctrl | 0   | 1  | 0   | 1   | 3    | 1   | 0   | 31969 | 1085 |
| 2018-10-07 | 132 | 13 Ctrl | 175 | 0  | 8   | 21  | 211  | 7   | 100 | 32180 | 1092 |
| 2018-10-08 | 133 | 19 Ctrl | 526 | 9  | 236 | 168 | 1086 | 147 | 100 | 33266 | 1129 |
| 2018-10-08 | 133 | 19 Ctrl | 4   | 0  | 0   | 0   | 4    | 0   | 0   | 33270 | 1129 |
| 2018-10-08 | 133 | 19 Ctrl | 35  | 8  | 7   | 4   | 55   | 1   | 0   | 33325 | 1131 |
| 2018-10-08 | 133 | 7 Ctrl  | 134 | 4  | 62  | 76  | 320  | 44  | 100 | 33645 | 1142 |
| 2018-10-08 | 133 | 7 Ctrl  | 16  | 0  | 0   | 9   | 28   | 3   | 0   | 33673 | 1143 |
| 2018-10-08 | 133 | 11 Ctrl | 320 | 42 | 91  | 123 | 718  | 142 | 100 | 34391 | 1168 |
| 2018-10-08 | 133 | 13 Ctrl | 64  | 0  | 103 | 85  | 336  | 84  | 64  | 34727 | 1179 |
| 2018-10-09 | 134 | 13 Ctrl | 0   | 6  | 0   | 0   | 8    | 2   | 0   | 34735 | 1179 |
| 2018-10-09 | 134 | 13 Ctrl | 48  | 18 | 14  | 34  | 126  | 12  | 0   | 34861 | 1184 |
| 2018-10-09 | 134 | 11 Ctrl | 132 | 1  | 76  | 190 | 420  | 21  | 100 | 35281 | 1198 |
| 2018-10-09 | 134 | 11 Ctrl | 33  | 1  | 22  | 34  | 102  | 12  | 0   | 35383 | 1201 |
| 2018-10-09 | 134 | 10 Ctrl | 380 | 14 | 28  | 47  | 469  | 0   | 100 | 35852 | 1217 |
| 2018-10-10 | 135 | 3 Ctrl  | 66  | 2  | 85  | 55  | 253  | 45  | 66  | 36105 | 1226 |
| 2018-10-10 | 135 | 19 Ctrl | 121 | 10 | 29  | 71  | 245  | 14  | 100 | 36350 | 1234 |
| 2018-10-10 | 135 | 13 Ctrl | 263 | 5  | 16  | 27  | 321  | 10  | 100 | 36671 | 1245 |
| 2018-10-10 | 135 | 13 Ctrl | 230 | 8  | 1   | 20  | 260  | 1   | 100 | 36931 | 1254 |
| 2018-10-10 | 135 | 7 Ctrl  | 4   | 0  | 0   | 0   | 4    | 0   | 0   | 36935 | 1254 |
| 2018-10-10 | 135 | 7 Ctrl  | 7   | 0  | 0   | 0   | 7    | 0   | 0   | 36942 | 1254 |
| 2018-10-10 | 135 | 7 Ctrl  | 298 | 3  | 2   | 12  | 325  | 10  | 100 | 37267 | 1265 |
| 2018-10-11 | 136 | 19 Ctrl | 201 | 9  | 3   | 39  | 276  | 24  | 100 | 37543 | 1275 |
| 2018-10-11 | 136 | 7 Ctrl  | 5   | 0  | 0   | 1   | 6    | 0   | 0   | 37549 | 1275 |
| 2018-10-11 | 136 | 7 Ctrl  | 52  | 3  | 1   | 0   | 56   | 0   | 52  | 37605 | 1277 |
| 2018-10-11 | 136 | 7 Ctrl  | 1   | 1  | 0   | 0   | 13   | 11  | 0   | 37618 | 1277 |
| 2018-10-11 | 136 | 1 Ctrl  | 82  | 0  | 2   | 6   | 99   | 9   | 82  | 37717 | 1280 |
| 2018-10-11 | 136 | 13 Ctrl | 410 | 14 | 5   | 34  | 465  | 2   | 100 | 38182 | 1296 |
| 2018-10-11 | 136 | 11 Ctrl | 62  | 3  | 30  | 46  | 141  | 0   | 62  | 38323 | 1301 |
| 2018-10-12 | 137 | 19 Ctrl | 391 | 27 | 88  | 110 | 632  | 16  | 100 | 38955 | 1322 |
| 2018-10-12 | 137 | 10 Ctrl | 104 | 0  | 8   | 10  | 147  | 25  | 100 | 39102 | 1327 |
| 2018-10-12 | 137 | 10 Ctrl | 5   | 0  | 0   | 0   | 5    | 0   | 0   | 39107 | 1328 |
| 2018-10-12 | 137 | 7 Ctrl  | 174 | 11 | 7   | 17  | 223  | 14  | 100 | 39330 | 1335 |
| 2018-10-12 | 137 | 7 Ctrl  | 26  | 0  | 0   | 9   | 41   | 6   | 0   | 39371 | 1337 |
| 2018-10-12 | 137 | 19 Ctrl | 7   | 0  | 0   | 0   | 7    | 0   | 0   | 39378 | 1337 |
| 2018-10-12 | 137 | 11 Ctrl | 155 | 5  | 0   | 4   | 168  | 4   | 100 | 39546 | 1343 |
| 2018-10-13 | 138 | 3 Ctrl  | 246 | 14 | 39  | 17  | 316  | 0   | 100 | 39862 | 1353 |
| 2018-10-13 | 138 | 10 Ctrl | 199 | 13 | 18  | 0   | 243  | 13  | 100 | 40105 | 1362 |
| 2018-10-13 | 138 | 7 Ctrl  | 37  | 5  | 2   | 0   | 44   | 0   | 0   | 40149 | 1363 |
| 2018-10-13 | 138 | 11 Ctrl | 382 | 62 | 14  | 0   | 474  | 16  | 100 | 40623 | 1379 |
| 2018-10-13 | 138 | 13 Ctrl | 211 | 22 | 55  | 62  | 351  | 1   | 100 | 40974 | 1391 |
| 2018-10-13 | 138 | 13 Ctrl | 46  | 6  | 7   | 11  | 74   | 4   | 0   | 41048 | 1394 |
| 2018-10-13 | 138 | 19 Ctrl | 192 | 75 | 23  | 14  | 312  | 8   | 100 | 41360 | 1404 |

|            |     |         |     |     |     |     |     |    |     |       |      |
|------------|-----|---------|-----|-----|-----|-----|-----|----|-----|-------|------|
| 2018-10-14 | 139 | 13 Ctrl | 24  | 0   | 2   | 0   | 26  | 0  | 0   | 41386 | 1405 |
| 2018-10-14 | 139 | 13 Ctrl | 103 | 2   | 3   | 0   | 108 | 0  | 93  | 41494 | 1409 |
| 2018-10-14 | 139 | 11 Ctrl | 340 | 15  | 15  | 3   | 380 | 7  | 100 | 41874 | 1422 |
| 2018-10-14 | 139 | 11 Ctrl | 153 | 20  | 1   | 2   | 180 | 4  | 100 | 42054 | 1428 |
| 2018-10-14 | 139 | 16 Ctrl | 81  | 7   | 2   | 91  | 181 | 0  | 81  | 42235 | 1434 |
| 2018-10-14 | 139 | 16 Ctrl | 31  | 0   | 0   | 10  | 41  | 0  | 0   | 42276 | 1435 |
| 2018-10-15 | 140 | 7 Ctrl  | 65  | 2   | 6   | 2   | 78  | 3  | 65  | 42354 | 1438 |
| 2018-10-15 | 140 | 1 Ctrl  | 183 | 0   | 2   | 13  | 205 | 7  | 100 | 42559 | 1445 |
| 2018-10-15 | 140 | 1 Ctrl  | 0   | 0   | 0   | 0   | 1   | 1  | 0   | 42560 | 1445 |
| 2018-10-15 | 140 | 16 Ctrl | 272 | 16  | 25  | 51  | 364 | 0  | 100 | 42924 | 1457 |
| 2018-10-15 | 140 | 16 Ctrl | 224 | 2   | 46  | 88  | 360 | 0  | 100 | 43284 | 1469 |
| 2018-10-15 | 140 | 13 Ctrl | 138 | 0   | 48  | 129 | 388 | 73 | 100 | 43672 | 1483 |
| 2018-10-15 | 140 | 11 Ctrl | 1   | 0   | 1   | 7   | 20  | 11 | 0   | 43692 | 1483 |
| 2018-10-15 | 140 | 11 Ctrl | 40  | 7   | 26  | 29  | 134 | 32 | 0   | 43826 | 1488 |
| 2018-10-15 | 140 | 11 Ctrl | 2   | 0   | 1   | 0   | 3   | 0  | 0   | 43829 | 1488 |
| 2018-10-15 | 140 | 19 Ctrl | 0   | 0   | 1   | 0   | 1   | 0  | 0   | 43830 | 1488 |
| 2018-10-15 | 140 | 19 Ctrl | 24  | 30  | 2   | 0   | 62  | 6  | 0   | 43892 | 1490 |
| 2018-10-16 | 141 | 13 Ctrl | 121 | 2   | 1   | 0   | 125 | 1  | 100 | 44017 | 1494 |
| 2018-10-16 | 141 | 11 Ctrl | 299 | 9   | 20  | 38  | 402 | 36 | 100 | 44419 | 1508 |
| 2018-10-16 | 141 | 19 Ctrl | 158 | 3   | 3   | 37  | 214 | 13 | 100 | 44633 | 1515 |
| 2018-10-16 | 141 | 16 Ctrl | 1   | 0   | 0   | 0   | 2   | 1  | 0   | 44635 | 1515 |
| 2018-10-16 | 141 | 3 Ctrl  | 165 | 5   | 42  | 46  | 268 | 10 | 100 | 44903 | 1524 |
| 2018-10-16 | 141 | 1 Ctrl  | 87  | 3   | 18  | 18  | 126 | 0  | 87  | 45029 | 1529 |
| 2018-10-16 | 141 | 10 Ctrl | 122 | 2   | 84  | 10  | 231 | 13 | 100 | 45260 | 1537 |
| 2018-10-16 | 141 | 10 Ctrl | 20  | 0   | 1   | 2   | 23  | 0  | 0   | 45283 | 1537 |
| 2018-10-16 | 141 | 7 Ctrl  | 147 | 11  | 11  | 24  | 193 | 0  | 100 | 45476 | 1544 |
| 2018-10-16 | 141 | 7 Ctrl  | 63  | 14  | 36  | 37  | 156 | 6  | 63  | 45632 | 1549 |
| 2018-10-16 | 141 | 7 Ctrl  | 7   | 0   | 0   | 1   | 8   | 0  | 0   | 45640 | 1549 |
| 2018-10-17 | 142 | 19 Ctrl | 258 | 42  | 9   | 0   | 309 | 0  | 100 | 45949 | 1560 |
| 2018-10-17 | 142 | 11 Ctrl | 60  | 76  | 0   | 1   | 145 | 8  | 60  | 46094 | 1565 |
| 2018-10-17 | 142 | 13 Ctrl | 4   | 1   | 0   | 0   | 5   | 0  | 0   | 46099 | 1565 |
| 2018-10-17 | 142 | 13 Ctrl | 565 | 40  | 21  | 19  | 678 | 33 | 100 | 46777 | 1588 |
| 2018-10-17 | 142 | 10 Ctrl | 6   | 1   | 0   | 0   | 8   | 1  | 0   | 46785 | 1588 |
| 2018-10-18 | 143 | 16 Ctrl | 85  | 7   | 12  | 74  | 184 | 6  | 85  | 46969 | 1595 |
| 2018-10-18 | 143 | 13 Ctrl | 106 | 11  | 41  | 63  | 248 | 27 | 100 | 47217 | 1603 |
| 2018-10-18 | 143 | 11 Ctrl | 56  | 0   | 23  | 37  | 135 | 19 | 56  | 47352 | 1608 |
| 2018-10-18 | 143 | 7 Ctrl  | 38  | 0   | 14  | 21  | 77  | 4  | 0   | 47429 | 1610 |
| 2018-10-18 | 143 | 7 Ctrl  | 17  | 0   | 0   | 0   | 17  | 0  | 0   | 47446 | 1611 |
| 2018-10-18 | 143 | 7 Ctrl  | 1   | 0   | 0   | 1   | 3   | 1  | 0   | 47449 | 1611 |
| 2018-10-18 | 143 | 1 Ctrl  | 83  | 1   | 43  | 16  | 205 | 62 | 83  | 47654 | 1618 |
| 2018-10-19 | 144 | 19 Ctrl | 7   | 0   | 0   | 0   | 7   | 0  | 0   | 47661 | 1618 |
| 2018-10-19 | 144 | 11 Ctrl | 3   | 1   | 4   | 1   | 10  | 1  | 0   | 47671 | 1618 |
| 2018-10-19 | 144 | 19 Ctrl | 403 | 113 | 121 | 11  | 668 | 20 | 200 | 48339 | 1641 |
| 2018-10-19 | 144 | 7 Ctrl  | 47  | 0   | 6   | 0   | 53  | 0  | 0   | 48392 | 1643 |
| 2018-10-19 | 144 | 7 Ctrl  | 238 | 6   | 0   | 3   | 250 | 3  | 100 | 48642 | 1651 |
| 2018-10-20 | 145 | 11 Ctrl | 156 | 2   | 10  | 14  | 225 | 43 | 0   | 48867 | 1659 |
| 2018-10-20 | 145 | 3 Ctrl  | 29  | 4   | 1   | 20  | 65  | 11 | 0   | 48932 | 1661 |

|            |     |         |        |    |        |      |     |    |     |       |      |
|------------|-----|---------|--------|----|--------|------|-----|----|-----|-------|------|
| 2018-10-20 | 145 | 3 Ctrl  | 106    | 8  | 2      | 14   | 137 | 7  | 100 | 49069 | 1666 |
| 2018-10-20 | 145 | 19 Ctrl | 16     | 34 | 2      | 0    | 56  | 4  | 0   | 49125 | 1668 |
| 2018-10-20 | 145 | 19 Ctrl | 2      | 0  | 0      | 0    | 2   | 0  | 0   | 49127 | 1668 |
| 2018-10-20 | 145 | 10 Ctrl | 240    | 4  | 1      | 13   | 275 | 17 | 0   | 49402 | 1677 |
| 2018-10-20 | 145 | 10 Ctrl | 133    | 0  | 5      | 4    | 204 | 62 | 0   | 49606 | 1684 |
| 2018-10-20 | 145 | 7 Ctrl  | 27     | 11 | 1      | 16   | 65  | 10 | 0   | 49671 | 1686 |
| 2018-10-20 | 145 | 7 Ctrl  | 16     | 1  | 1      | 0    | 21  | 3  | 0   | 49692 | 1687 |
| 2018-10-21 | 146 | 10 Ctrl | 0      | 0  | 0      | 0    | 2   | 2  | 0   | 49694 | 1687 |
| 2018-10-21 | 146 | 10 Ctrl | 8      | 0  | 0      | 0    | 11  | 3  | 0   | 49705 | 1687 |
| 2018-10-21 | 146 | 7 Ctrl  | 0      | 0  | 0      | 0    | 2   | 2  | 0   | 49707 | 1688 |
| 2018-10-21 | 146 | 16 Ctrl | 175    | 6  | 12     | 18   | 215 | 4  | 0   | 49922 | 1695 |
| 2018-10-21 | 146 | 19 Ctrl | 3      | 2  | 0      | 4    | 10  | 1  | 0   | 49932 | 1695 |
| 2018-10-21 | 146 | 11 Ctrl | 26     | 2  | 0      | 2    | 30  | 0  | 0   | 49962 | 1696 |
| 2018-10-21 | 146 | 11 Ctrl | 443    | 56 | 35     | 6    | 540 | 0  | 0   | 50502 | 1715 |
| 2018-10-21 | 146 | 13 Ctrl | 584    | 36 | 76     | 58   | 814 | 60 | 0   | 51316 | 1742 |
| 2018-10-21 | 146 | 13 Ctrl | 200    | 4  | 4      | 18   | 234 | 8  | 0   | 51550 | 1750 |
| 2018-10-21 | 146 | 13 Ctrl | 3      | 0  | 0      | 0    | 3   | 0  | 0   | 51553 | 1750 |
| 2018-10-21 | 146 | 1 Ctrl  | 21     | 0  | 0      | 0    | 23  | 2  | 0   | 51576 | 1751 |
| 2018-10-21 | 146 | 1 Ctrl  | 172    | 77 | 11     | 3    | 268 | 5  | 0   | 51844 | 1760 |
| 2018-10-22 | 147 | 19 Ctrl | 110    | 15 | 37     | 55   | 265 | 48 | 100 | 52109 | 1769 |
| 2018-10-22 | 147 | 19 Ctrl | 4      | 0  | 0      | 0    | 4   | 0  | 0   | 52113 | 1769 |
| 2018-10-22 | 147 | 16 Ctrl | 64     | 0  | 14     | 45   | 126 | 3  | 64  | 52239 | 1773 |
| 2018-10-22 | 147 | 16 Ctrl | 64     | 11 | 0      | 28   | 104 | 1  | 64  | 52343 | 1777 |
| 2018-10-22 | 147 | 11 Ctrl | 2      | 0  | 0      | 0    | 2   | 0  | 0   | 52345 | 1777 |
| 2018-10-22 | 147 | 11 Ctrl | 3      | 0  | 2      | 0    | 5   | 0  | 0   | 52350 | 1777 |
| 2018-10-22 | 147 | 1 Ctrl  | 87     | 0  | 17     | 84   | 193 | 5  | 87  | 52543 | 1784 |
| 2018-10-22 | 147 | 7 Ctrl  | 246    | 2  | 35     | 64   | 347 | 0  | 100 | 52890 | 1796 |
| 2018-10-23 | 148 | 3 Ctrl  | 180    | 6  | 15     | 20   | 234 | 13 | 100 | 53124 | 1804 |
| 2018-10-23 | 148 | 3 Ctrl  | 1      | 0  | 1      | 0    | 2   | 0  | 0   | 53126 | 1804 |
| 2018-10-23 | 148 | 19 Ctrl | 21     | 0  | 0      | 0    | 21  | 0  | 0   | 53147 | 1804 |
| 2018-10-23 | 148 | 19 Ctrl | 40     | 9  | 1      | 2    | 52  | 0  | 0   | 53199 | 1806 |
| 2018-10-23 | 148 | 19 Ctrl | 19     | 6  | 4      | 1    | 37  | 7  | 0   | 53236 | 1807 |
| 2018-10-23 | 148 | 11 Ctrl | 34     | 5  | 6      | 6    | 59  | 8  | 0   | 53295 | 1809 |
| 2018-10-23 | 148 | 7 Ctrl  | 5      | 0  | 0      | 1    | 7   | 1  | 0   | 53302 | 1810 |
| 2018-10-24 | 149 | 19 Ctrl | 702.75 | 0  | 234.25 | 0    | 937 |    | 0   | 54239 | 1841 |
| 2018-10-24 | 149 | 16 Ctrl | 2      | 0  | 0      | 0    | 2   | 0  | 0   | 54241 | 1841 |
| 2018-10-24 | 149 | 16 Ctrl | 5      | 0  | 0      | 0    | 5   | 0  | 0   | 54246 | 1842 |
| 2018-10-24 | 149 | 10 Ctrl | 19     | 0  | 17     | 1    | 49  | 12 | 0   | 54295 | 1843 |
| 2018-10-24 | 149 | 7 Ctrl  | 162    | 4  | 4      | 24   | 194 | 0  | 100 | 54489 | 1850 |
| 2018-10-24 | 149 | 1 Ctrl  | 13     | 54 | 17     | 1    | 106 | 21 | 0   | 54595 | 1853 |
| 2018-10-24 | 149 | 11 Ctrl | 189    | 3  | 28     | 16   | 236 | 0  | 100 | 54831 | 1861 |
| 2018-10-25 | 150 | 7 Ctrl  | 20     | 6  | 0      | 3    | 29  | 0  | 0   | 54860 | 1862 |
| 2018-10-25 | 150 | 1 Ctrl  | 195    | 3  | 2      | 4    | 222 | 18 | 100 | 55082 | 1870 |
| 2018-10-25 | 150 | 13 Ctrl | 134    | 1  | 39     | 111  | 321 | 36 | 100 | 55403 | 1881 |
| 2018-10-26 | 151 | 11 Ctrl | 0      | 0  | 0      | 0    | 3   | 3  | 0   | 55406 | 1881 |
| 2018-10-26 | 151 | 13 Ctrl | 365.04 | 0  | 32.76  | 23.4 | 468 |    | 0   | 55874 | 1897 |
| 2018-10-26 | 151 | 13 Ctrl | 209    | 10 | 2      | 27   | 288 | 40 | 100 | 56162 | 1907 |

|            |     |         |        |        |        |        |     |    |     |       |      |
|------------|-----|---------|--------|--------|--------|--------|-----|----|-----|-------|------|
| 2018-10-26 | 151 | 1 Ctrl  | 240    | 90     | 5      | 36     | 371 | 0  | 100 | 56533 | 1919 |
| 2018-10-26 | 151 | 10 Ctrl | 1      | 0      | 3      | 0      | 4   | 0  | 0   | 56537 | 1919 |
| 2018-10-26 | 151 | 10 Ctrl | 4      | 0      | 2      | 0      | 6   | 0  | 0   | 56543 | 1920 |
| 2018-10-26 | 151 | 7 Ctrl  | 5      | 0      | 1      | 0      | 6   | 0  | 0   | 56549 | 1920 |
| 2018-10-26 | 151 | 7 Ctrl  | 70     | 0      | 4      | 6      | 80  | 0  | 70  | 56629 | 1923 |
| 2018-10-27 | 152 | 3 Ctrl  | 75     | 2      | 4      | 7      | 90  | 2  | 75  | 56719 | 1926 |
| 2018-10-27 | 152 | 3 Ctrl  | 13     | 0      | 4      | 2      | 19  | 0  | 0   | 56738 | 1926 |
| 2018-10-27 | 152 | 11 Ctrl | 228.5  | 57.125 | 57.125 | 114.25 | 457 |    | 0   | 57195 | 1942 |
| 2018-10-27 | 152 | 11 Ctrl | 45     | 0      | 45     | 22.5   | 90  |    | 0   | 57285 | 1945 |
| 2018-10-27 | 152 | 13 Ctrl | 77.5   | 19.375 | 19.375 | 38.75  | 155 |    | 0   | 57440 | 1950 |
| 2018-10-27 | 152 | 19 Ctrl | 168    | 0      | 0      | 56     | 224 |    | 0   | 57664 | 1958 |
| 2018-10-27 | 152 | 19 Ctrl | 43     | 1      | 3      | 0      | 47  | 0  | 0   | 57711 | 1959 |
| 2018-10-28 | 153 | 13 Ctrl | 246.75 | 0      | 0      | 82.25  | 329 |    | 0   | 58040 | 1970 |
| 2018-10-28 | 153 | 11 Ctrl | 24.09  | 0      | 24.09  | 24.09  | 73  |    | 0   | 58113 | 1973 |
| 2018-10-28 | 153 | 11 Ctrl | 54     | 18     | 0      | 0      | 72  |    | 0   | 58185 | 1975 |
| 2018-10-28 | 153 | 10 Ctrl | 58     | 9      | 21     | 12     | 112 | 12 | 58  | 58297 | 1979 |
| 2018-10-28 | 153 | 7 Ctrl  | 57     | 0      | 19     | 0      | 76  |    | 0   | 58373 | 1982 |
| 2018-10-28 | 153 | 1 Ctrl  | 64.02  | 0      | 64.02  | 64.02  | 194 |    | 0   | 58567 | 1988 |
| 2018-10-28 | 153 | 19 Ctrl | 32.75  | 65.5   | 0      | 32.75  | 131 |    | 0   | 58698 | 1993 |
| 2018-10-28 | 153 | 16 Ctrl | 99     | 16.5   | 0      | 16.5   | 132 |    | 0   | 58830 | 1997 |
| 2018-10-29 | 154 | 19 Ctrl | 405    | 0      | 405    | 0      | 810 |    | 0   | 59640 | 2025 |
| 2018-10-29 | 154 | 19 Ctrl | 1      | 0      | 9      | 5      | 15  | 0  | 0   | 59655 | 2025 |
| 2018-10-29 | 154 | 16 Ctrl | 0      | 0      | 0      | 2      | 2   | 0  | 0   | 59657 | 2025 |
| 2018-10-29 | 154 | 16 Ctrl | 137    | 55     | 28     | 181    | 432 | 31 | 100 | 60089 | 2040 |
| 2018-10-29 | 154 | 7 Ctrl  | 33     | 0      | 66     | 33     | 132 |    | 0   | 60221 | 2044 |
| 2018-10-29 | 154 | 7 Ctrl  | 10     | 4      | 0      | 7      | 21  | 0  | 0   | 60242 | 2045 |
| 2018-10-30 | 155 | 13 Ctrl | 518.05 | 39.85  | 79.7   | 159.4  | 797 |    | 0   | 61039 | 2072 |
| 2018-10-30 | 155 | 16 Ctrl | 152.5  | 61     | 30.5   | 61     | 305 |    | 0   | 61344 | 2083 |
| 2018-10-30 | 155 | 10 Ctrl | 20     | 5      | 0      | 11     | 37  | 1  | 0   | 61381 | 2084 |
| 2018-10-30 | 155 | 10 Ctrl | 191    | 0      | 16     | 7      | 223 | 9  | 100 | 61604 | 2091 |
| 2018-10-30 | 155 | 3 Ctrl  | 29     | 0      | 10     | 14     | 55  | 2  | 0   | 61659 | 2093 |
| 2018-10-31 | 156 | 7 Ctrl  | 406.7  | 58.1   | 58.1   | 58.1   | 581 |    | 0   | 62240 | 2113 |
| 2018-10-31 | 156 | 7 Ctrl  | 2      | 0      | 0      | 3      | 5   | 0  | 0   | 62245 | 2113 |
| 2018-10-31 | 156 | 16 Ctrl | 117    | 1      | 0      | 7      | 125 |    | 0   | 62370 | 2117 |
| 2018-10-31 | 156 | 16 Ctrl | 43     | 1      | 2      | 0      | 46  |    | 0   | 62416 | 2119 |
| 2018-10-31 | 156 | 13 Ctrl | 30     | 1      | 3      | 1      | 35  |    | 0   | 62451 | 2120 |
| 2018-10-31 | 156 | 13 Ctrl | 346    | 18     | 35     | 37     | 436 |    | 0   | 62887 | 2135 |
| 2018-11-01 | 157 | 10 Ctrl | 10     | 4      | 43     | 0      | 57  |    | 0   | 62944 | 2137 |
| 2018-11-01 | 157 | 7 Ctrl  | 25.5   | 0      | 0      | 25.5   | 51  |    | 0   | 62995 | 2139 |
| 2018-11-01 | 157 | 1 Ctrl  | 182    | 0      | 0      | 182    | 364 |    | 0   | 63359 | 2151 |
| 2018-11-02 | 158 | 11 Ctrl | 322    | 12     | 1      | 1      | 339 | 3  | 100 | 63698 | 2163 |
| 2018-11-02 | 158 | 11 Ctrl | 13     | 3      | 0      | 0      | 18  | 2  | 0   | 63716 | 2163 |
| 2018-11-02 | 158 | 10 Ctrl | 57     | 0      | 11     | 11     | 79  | 0  | 57  | 63795 | 2166 |
| 2018-11-02 | 158 | 1 Ctrl  | 1      | 0      | 2      | 0      | 3   | 0  | 0   | 63798 | 2166 |
| 2018-11-02 | 158 | 1 Ctrl  | 150    | 75     | 0      | 75     | 300 |    | 0   | 64098 | 2176 |
| 2018-11-03 | 159 | 16 Ctrl | 59.25  | 0      | 0      | 19.75  | 79  |    | 0   | 64177 | 2179 |
| 2018-11-03 | 159 | 13 Ctrl | 175.5  | 0      | 0      | 19.5   | 195 |    | 0   | 64372 | 2185 |



|            |     |         |        |       |        |        |      |     |    |       |      |
|------------|-----|---------|--------|-------|--------|--------|------|-----|----|-------|------|
| 2018-11-03 | 159 | 11 Ctrl | 87.3   | 4.85  | 0      | 4.85   | 97   |     | 0  | 64469 | 2189 |
| 2018-11-03 | 159 | 7 Ctrl  | 4      | 1     | 3      | 3      | 12   | 1   | 0  | 64481 | 2189 |
| 2018-11-03 | 159 | 7 Ctrl  | 161.5  | 0     | 0      | 8.5    | 170  |     | 0  | 64651 | 2195 |
| 2018-11-03 | 159 | 7 Ctrl  | 195.7  | 0     | 0      | 10.3   | 206  |     | 0  | 64857 | 2202 |
| 2018-11-04 | 160 | 16 Ctrl | 84.25  | 84.25 | 0      | 168.5  | 337  |     | 0  | 65194 | 2213 |
| 2018-11-04 | 160 | 13 Ctrl | 745.5  | 0     | 124.25 | 124.25 | 994  |     | 0  | 66188 | 2247 |
| 2018-11-04 | 160 | 13 Ctrl | 23     | 1     | 0      | 0      | 24   | 0   | 0  | 66212 | 2248 |
| 2018-11-04 | 160 | 11 Ctrl | 1      | 0     | 0      | 1      | 2    | 0   | 0  | 66214 | 2248 |
| 2018-11-04 | 160 | 11 Ctrl | 758.1  | 0     | 39.9   | 0      | 798  |     | 0  | 67012 | 2275 |
| 2018-11-04 | 160 | 10 Ctrl | 2      | 0     | 0      | 1      | 3    | 0   | 0  | 67015 | 2275 |
| 2018-11-04 | 160 | 7 Ctrl  | 143    | 0     | 0      | 143    | 286  |     | 0  | 67301 | 2285 |
| 2018-11-04 | 160 | 1 Ctrl  | 90.5   | 0     | 90.5   | 0      | 181  |     | 0  | 67482 | 2291 |
| 2018-11-05 | 161 | 13 Ctrl | 100    | 0     | 6.25   | 18.75  | 125  |     | 0  | 67607 | 2295 |
| 2018-11-05 | 161 | 10 Ctrl | 66     | 5     | 17     | 5      | 101  | 8   | 66 | 67708 | 2299 |
| 2018-11-05 | 161 | 10 Ctrl | 13.6   | 34    | 10.2   | 10.2   | 68   |     | 0  | 67776 | 2301 |
| 2018-11-06 | 162 | 16 Ctrl | 1      | 1     | 3      | 2      | 8    | 1   | 0  | 67784 | 2301 |
| 2018-11-06 | 162 | 16 Ctrl | 151.6  | 37.9  | 37.9   | 151.6  | 379  |     | 0  | 68163 | 2314 |
| 2018-11-06 | 162 | 11 Ctrl | 41.25  | 0     | 13.75  | 0      | 55   |     | 0  | 68218 | 2316 |
| 2018-11-06 | 162 | 7 Ctrl  | 10     | 0     | 0      | 0      | 10   | 0   | 0  | 68228 | 2316 |
| 2018-11-06 | 162 | 11 Ctrl | 26     | 0     | 7      | 0      | 33   | 0   | 0  | 68261 | 2317 |
| 2018-11-07 | 163 | 16 Ctrl | 64.2   | 0     | 0      | 42.8   | 107  |     | 0  | 68368 | 2321 |
| 2018-11-07 | 163 | 16 Ctrl | 64     | 0     | 0      | 64     | 128  |     | 0  | 68496 | 2325 |
| 2018-11-07 | 163 | 13 Ctrl | 349.6  | 21.85 | 21.85  | 43.7   | 437  |     | 0  | 68933 | 2340 |
| 2018-11-07 | 163 | 13 Ctrl | 238    | 47.6  | 0      | 190.4  | 476  |     | 0  | 69409 | 2356 |
| 2018-11-07 | 163 | 11 Ctrl | 97.8   | 32.6  | 0      | 32.6   | 163  |     | 0  | 69572 | 2362 |
| 2018-11-07 | 163 | 11 Ctrl | 5      | 5     | 5      | 5      | 20   |     | 0  | 69592 | 2363 |
| 2018-11-07 | 163 | 7 Ctrl  | 22.5   | 0     | 4.5    | 18     | 45   |     | 0  | 69637 | 2364 |
| 2018-11-07 | 163 | 7 Ctrl  | 318    | 21.2  | 42.4   | 42.4   | 424  |     | 0  | 70061 | 2379 |
| 2018-11-07 | 163 | 1 Ctrl  | 247.2  | 0     | 15.45  | 46.35  | 309  |     | 0  | 70370 | 2389 |
| 2018-11-08 | 164 | 11 Ctrl | 103    | 0     | 103    | 0      | 206  |     | 0  | 70576 | 2396 |
| 2018-11-08 | 164 | 13 Ctrl | 42     | 0     | 4      | 0      | 46   |     | 0  | 70622 | 2398 |
| 2018-11-08 | 164 | 13 Ctrl | 67     | 0     | 14     | 0      | 81   |     | 0  | 70703 | 2400 |
| 2018-11-08 | 164 | 19 Ctrl | 391.5  | 0     | 130.5  | 0      | 522  |     | 0  | 71225 | 2418 |
| 2018-11-08 | 164 | 19 Ctrl | 1      | 0     | 0      | 0      | 1    | 0   | 0  | 71226 | 2418 |
| 2018-11-09 | 165 | 11 Ctrl | 88.5   | 23.6  | 5.9    | 0      | 118  |     | 0  | 71344 | 2422 |
| 2018-11-09 | 165 | 19 Ctrl | 6      | 1     | 0      | 0      | 8    | 1   | 0  | 71352 | 2422 |
| 2018-11-09 | 165 | 19 Ctrl | 959.4  | 53.3  | 0      | 53.3   | 1066 |     | 0  | 72418 | 2459 |
| 2018-11-09 | 165 | 10 Ctrl | 103    | 2     | 6      | 2      | 113  |     | 0  | 72531 | 2462 |
| 2018-11-09 | 165 | 7 Ctrl  | 27     | 0     | 1      | 0      | 28   |     | 0  | 72559 | 2463 |
| 2018-11-09 | 165 | 7 Ctrl  | 16     | 0     | 0      | 0      | 4    |     | 0  | 72563 | 2463 |
| 2018-11-09 | 165 | 7 Ctrl  | 92     | 0     | 8      | 0      | 100  |     | 0  | 72663 | 2467 |
| 2018-11-09 | 165 | 1 Ctrl  | 129    | 1472  | 6440   | 2208   | 184  |     | 0  | 72847 | 2473 |
| 2018-11-10 | 166 | 10 Ctrl | 17     | 7     | 0      | 5      | 130  | 101 | 0  | 72977 | 2478 |
| 2018-11-10 | 166 | 7 Ctrl  | 195    | 0     | 32.5   | 97.5   | 325  |     | 0  | 73302 | 2489 |
| 2018-11-10 | 166 | 7 Ctrl  | 200.75 | 0     | 18.25  | 146    | 365  |     | 0  | 73667 | 2501 |
| 2018-11-10 | 166 | 1 Ctrl  | 80.36  | 0     | 0.82   | 0      | 82   |     | 0  | 73749 | 2504 |
| 2018-11-10 | 166 | 1 Ctrl  | 2      | 0     | 0      | 0      | 2    | 0   | 0  | 73751 | 2504 |

|            |     |         |        |       |       |       |     |    |     |       |      |
|------------|-----|---------|--------|-------|-------|-------|-----|----|-----|-------|------|
| 2018-11-10 | 166 | 1 Ctrl  | 112.23 | 11.61 | 5.16  | 0     | 129 |    | 0   | 73880 | 2508 |
| 2018-11-10 | 166 | 11 Ctrl | 14     | 0     | 2     | 5     | 30  | 9  | 0   | 73910 | 2509 |
| 2018-11-10 | 166 | 11 Ctrl | 68.4   | 0     | 0     | 3.8   | 76  |    | 0   | 73986 | 2512 |
| 2018-11-11 | 167 | 10 Ctrl | 0      | 0     | 0     | 0     | 1   |    | 0   | 73987 | 2512 |
| 2018-11-11 | 167 | 11 Ctrl | 23.4   | 6     | 0.6   | 30    | 60  |    | 0   | 74047 | 2514 |
| 2018-11-11 | 167 | 13 Ctrl | 766.7  | 45.1  | 45.1  | 45.1  | 902 |    | 0   | 74949 | 2544 |
| 2018-11-11 | 167 | 3 Ctrl  | 9      | 0     | 0     | 0     | 13  | 4  | 0   | 74962 | 2545 |
| 2018-11-11 | 167 | 1 Ctrl  | 3      | 1     | 0     | 0     | 4   | 0  | 0   | 74966 | 2545 |
| 2018-11-11 | 167 | 16 Ctrl | 20     | 1     | 0     | 3     | 29  | 5  | 0   | 74995 | 2546 |
| 2018-11-11 | 167 | 16 Ctrl | 112.86 | 0     | 0     | 1.14  | 114 |    | 0   | 75109 | 2550 |
| 2018-11-12 | 168 | 16 Ctrl | 3.3    | 0     | 0     | 62.7  | 66  |    | 0   | 75175 | 2552 |
| 2018-11-12 | 168 | 16 Ctrl | 173.7  | 0     | 0     | 19.3  | 193 |    | 0   | 75368 | 2559 |
| 2018-11-12 | 168 | 11 Ctrl | 4.65   | 88.35 | 0     | 0     | 93  |    | 0   | 75461 | 2562 |
| 2018-11-12 | 168 | 1 Ctrl  | 51.25  | 0     | 102.5 | 51.25 | 205 |    | 0   | 75666 | 2569 |
| 2018-08-26 | 90  |         |        |       |       |       |     |    |     | 0     | 0    |
| 2018-08-29 | 93  |         |        |       |       |       |     |    |     | 0     | 0    |
| 2018-08-30 | 94  | 15 3    | 2      | 19    | 0     | 0     | 27  | 6  | 0   | 27    | 2    |
| 2018-08-31 | 95  | 15 3    | 31     | 31    | 16    | 75    | 159 | 6  | 0   | 186   | 11   |
| 2018-08-31 | 95  | 15 3    | 24     | 0     | 12    | 65    | 101 | 0  | 0   | 287   | 17   |
| 2018-09-01 | 96  | 15 3    | 41     | 0     | 14    | 27    | 82  | 0  | 0   | 369   | 22   |
| 2018-09-02 | 97  | 15 3    | 121    | 0     | 26    | 67    | 215 | 1  | 100 | 584   | 35   |
| 2018-09-03 | 98  | 15 3    | 48     | 8     | 2     | 15    | 77  | 4  | 0   | 661   | 40   |
| 2018-09-04 | 99  | 15 3    | 117    | 5     | 3     | 9     | 141 | 7  | 100 | 802   | 48   |
| 2018-09-05 | 100 | 17 3    | 131    | 0     | 37    | 37    | 205 | 0  | 100 | 1007  | 61   |
| 2018-09-06 | 101 | 15 3    | 278    | 2     | 7     | 5     | 302 | 10 | 100 | 1309  | 79   |
| 2018-09-07 | 102 | 15 3    | 54     | 0     | 1     | 3     | 58  | 0  | 54  | 1367  | 82   |
| 2018-09-08 | 103 | 15 3    | 135    | 4     | 4     | 34    | 186 | 9  | 100 | 1553  | 94   |
| 2018-09-09 | 104 | 15 3    | 233    | 26    | 2     | 27    | 302 | 14 | 100 | 1855  | 112  |
| 2018-09-09 | 104 | 9 3     | 129    | 0     | 1     | 1     | 137 | 6  | 100 | 1992  | 120  |
| 2018-09-11 | 106 | 15 3    | 143    | 1     | 42    | 12    | 220 | 22 | 100 | 2212  | 133  |
| 2018-09-11 | 106 | 9 3     | 81     | 12    | 60    | 0     | 167 | 14 | 81  | 2379  | 143  |
| 2018-09-12 | 107 | 15 3    | 73     | 3     | 29    | 23    | 158 | 30 | 73  | 2537  | 153  |
| 2018-09-12 | 107 | 15 3    | 184    | 15    | 8     | 56    | 281 | 18 | 100 | 2818  | 170  |
| 2018-09-13 | 108 | 9 3     | 121    | 58    | 3     | 3     | 191 | 6  | 100 | 3009  | 181  |
| 2018-09-13 | 108 | 4 3     | 192    | 5     | 0     | 23    | 220 | 0  | 100 | 3229  | 195  |
| 2018-09-14 | 109 | 15 3    | 590    | 0     | 58    | 33    | 681 | 0  | 100 | 3910  | 236  |
| 2018-09-15 | 110 | 17 3    | 280    | 5     | 4     | 8     | 299 | 2  | 100 | 4209  | 254  |
| 2018-09-15 | 110 | 15 3    | 242    | 5     | 3     | 0     | 250 | 0  | 100 | 4459  | 269  |
| 2018-09-15 | 110 | 4 3     | 34     | 2     | 1     | 0     | 37  | 0  | 0   | 4496  | 271  |
| 2018-09-15 | 110 | 9 3     | 209    | 5     | 8     | 17    | 241 | 2  | 100 | 4737  | 286  |
| 2018-09-16 | 111 | 9 3     | 87     | 5     | 8     | 8     | 110 | 2  | 87  | 4847  | 292  |
| 2018-09-16 | 111 | 4 3     | 320    | 33    | 20    | 17    | 390 | 0  | 100 | 5237  | 316  |
| 2018-09-16 | 111 | 15 3    | 173    | 4     | 12    | 3     | 194 | 2  | 100 | 5431  | 328  |
| 2018-09-18 | 113 | 15 3    | 261    | 21    | 7     | 40    | 334 | 5  | 100 | 5765  | 348  |
| 2018-09-18 | 113 | 4 3     | 44     | 4     | 0     | 5     | 58  | 5  | 0   | 5823  | 351  |
| 2018-09-18 | 113 | 9 3     | 162    | 0     | 17    | 37    | 220 | 4  | 100 | 6043  | 364  |
| 2018-09-19 | 114 | 17 3    | 73     | 4     | 0     | 0     | 78  | 1  | 73  | 6121  | 369  |

|            |     |      |     |    |     |     |      |    |     |       |      |
|------------|-----|------|-----|----|-----|-----|------|----|-----|-------|------|
| 2018-09-19 | 114 | 4 3  | 91  | 31 | 24  | 62  | 219  | 11 | 91  | 6340  | 382  |
| 2018-09-19 | 114 | 4 3  | 29  | 0  | 3   | 10  | 43   | 1  | 0   | 6383  | 385  |
| 2018-09-19 | 114 | 15 3 | 387 | 0  | 21  | 34  | 450  | 8  | 100 | 6833  | 412  |
| 2018-09-20 | 115 | 15 3 | 360 | 9  | 6   | 5   | 383  | 3  | 100 | 7216  | 435  |
| 2018-09-20 | 115 | 15 3 | 4   | 0  | 0   | 0   | 4    | 0  | 0   | 7220  | 435  |
| 2018-09-20 | 115 | 9 3  | 244 | 2  | 5   | 2   | 253  | 0  | 100 | 7473  | 451  |
| 2018-09-20 | 115 | 4 3  | 99  | 13 | 28  | 23  | 167  | 4  | 99  | 7640  | 461  |
| 2018-09-20 | 115 | 17 3 | 113 | 0  | 12  | 0   | 125  | 0  | 100 | 7765  | 468  |
| 2018-09-21 | 116 | 17 3 | 208 | 8  | 14  | 4   | 240  | 6  | 100 | 8005  | 483  |
| 2018-09-22 | 117 | 9 3  | 137 | 1  | 14  | 34  | 198  | 12 | 100 | 8203  | 495  |
| 2018-09-22 | 117 | 4 3  | 131 | 1  | 3   | 3   | 147  | 9  | 100 | 8350  | 504  |
| 2018-09-22 | 117 | 4 3  | 2   | 0  | 0   | 0   | 2    | 0  | 0   | 8352  | 504  |
| 2018-09-22 | 117 | 15 3 | 260 | 14 | 27  | 74  | 403  | 28 | 100 | 8755  | 528  |
| 2018-09-23 | 118 | 17 3 | 119 | 2  | 1   | 43  | 177  | 12 | 100 | 8932  | 539  |
| 2018-09-23 | 118 | 17 3 | 114 | 2  | 22  | 118 | 323  | 67 | 100 | 9255  | 558  |
| 2018-09-23 | 118 | 17 3 | 211 | 2  | 2   | 21  | 243  | 7  | 100 | 9498  | 573  |
| 2018-09-23 | 118 | 9 3  | 20  | 0  | 5   | 16  | 56   | 15 | 0   | 9554  | 576  |
| 2018-09-23 | 118 | 4 3  | 12  | 1  | 1   | 2   | 16   | 0  | 0   | 9570  | 577  |
| 2018-09-23 | 118 | 4 3  | 47  | 2  | 9   | 19  | 77   | 0  | 0   | 9647  | 582  |
| 2018-09-23 | 118 | 15 3 | 180 | 2  | 2   | 19  | 219  | 16 | 100 | 9866  | 595  |
| 2018-09-23 | 118 | 15 3 | 287 | 1  | 3   | 9   | 301  | 1  | 100 | 10167 | 613  |
| 2018-09-24 | 119 | 15 3 | 318 | 5  | 29  | 30  | 385  | 3  | 100 | 10552 | 636  |
| 2018-09-24 | 119 | 4 3  | 269 | 21 | 11  | 14  | 339  | 24 | 100 | 10891 | 657  |
| 2018-09-24 | 119 | 4 3  | 206 | 11 | 4   | 4   | 229  | 4  | 100 | 11120 | 671  |
| 2018-09-24 | 119 | 9 3  | 265 | 2  | 4   | 3   | 287  | 13 | 100 | 11407 | 688  |
| 2018-09-25 | 120 | 15 3 | 102 | 1  | 3   | 7   | 121  | 8  | 100 | 11528 | 695  |
| 2018-09-25 | 120 | 15 3 | 136 | 0  | 0   | 1   | 138  | 1  | 100 | 11666 | 704  |
| 2018-09-25 | 120 | 4 3  | 10  | 1  | 0   | 0   | 11   | 0  | 0   | 11677 | 704  |
| 2018-09-25 | 120 | 4 3  | 101 | 1  | 1   | 16  | 128  | 9  | 100 | 11805 | 712  |
| 2018-09-25 | 120 | 4 3  | 27  | 0  | 2   | 3   | 35   | 3  | 0   | 11840 | 714  |
| 2018-09-26 | 121 | 15 3 | 288 | 17 | 2   | 12  | 334  | 15 | 100 | 12174 | 734  |
| 2018-09-26 | 121 | 17 3 | 186 | 47 | 4   | 9   | 256  | 10 | 100 | 12430 | 750  |
| 2018-09-27 | 122 | 9 3  | 271 | 1  | 1   | 2   | 276  | 1  | 100 | 12706 | 766  |
| 2018-09-27 | 122 | 9 3  | 297 | 1  | 0   | 2   | 300  | 0  | 100 | 13006 | 784  |
| 2018-09-27 | 122 | 15 3 | 526 | 6  | 16  | 5   | 591  | 38 | 100 | 13597 | 820  |
| 2018-09-28 | 123 | 4 3  | 2   | 1  | 0   | 2   | 9    | 4  | 0   | 13606 | 821  |
| 2018-09-28 | 123 | 4 3  | 15  | 0  | 0   | 0   | 19   | 4  | 0   | 13625 | 822  |
| 2018-09-29 | 124 | 4 3  | 295 | 27 | 19  | 16  | 388  | 31 | 100 | 14013 | 845  |
| 2018-09-29 | 124 | 17 3 | 371 | 30 | 14  | 19  | 450  | 16 | 100 | 14463 | 872  |
| 2018-09-30 | 125 | 15 3 | 154 | 1  | 4   | 7   | 181  | 15 | 100 | 14644 | 883  |
| 2018-09-30 | 125 | 15 3 | 4   | 0  | 0   | 0   | 4    | 0  | 0   | 14648 | 883  |
| 2018-09-30 | 125 | 17 3 | 184 | 27 | 5   | 14  | 240  | 10 | 100 | 14888 | 898  |
| 2018-10-01 | 126 | 9 3  | 198 | 5  | 9   | 31  | 243  | 0  | 100 | 15131 | 912  |
| 2018-10-01 | 126 | 15 3 | 693 | 38 | 101 | 140 | 1061 | 89 | 100 | 16192 | 976  |
| 2018-10-01 | 126 | 15 3 | 9   | 0  | 0   | 1   | 10   | 0  | 0   | 16202 | 977  |
| 2018-10-02 | 127 | 17 3 | 200 | 8  | 15  | 18  | 245  | 4  | 100 | 16447 | 992  |
| 2018-10-02 | 127 | 9 3  | 220 | 2  | 24  | 150 | 426  | 30 | 100 | 16873 | 1018 |

|            |     |      |     |     |     |     |     |     |     |       |      |
|------------|-----|------|-----|-----|-----|-----|-----|-----|-----|-------|------|
| 2018-10-02 | 127 | 4 3  | 25  | 1   | 1   | 0   | 30  | 3   | 0   | 16903 | 1019 |
| 2018-10-02 | 127 | 4 3  | 2   | 0   | 0   | 0   | 2   | 0   | 0   | 16905 | 1019 |
| 2018-10-02 | 127 | 15 3 | 246 | 8   | 2   | 0   | 274 | 18  | 100 | 17179 | 1036 |
| 2018-10-03 | 128 | 4 3  | 4   | 0   | 0   | 0   | 4   | 0   | 0   | 17183 | 1036 |
| 2018-10-03 | 128 | 4 3  | 106 | 7   | 5   | 19  | 137 | 0   | 100 | 17320 | 1044 |
| 2018-10-03 | 128 | 9 3  | 138 | 16  | 17  | 82  | 253 | 0   | 100 | 17573 | 1060 |
| 2018-10-03 | 128 | 9 3  | 6   | 0   | 0   | 0   | 6   | 0   | 0   | 17579 | 1060 |
| 2018-10-04 | 129 | 15 3 | 93  | 1   | 0   | 8   | 102 | 0   | 93  | 17681 | 1066 |
| 2018-10-04 | 129 | 15 3 | 334 | 7   | 74  | 141 | 631 | 75  | 100 | 18312 | 1104 |
| 2018-10-04 | 129 | 4 3  | 211 | 37  | 3   | 4   | 267 | 12  | 100 | 18579 | 1120 |
| 2018-10-04 | 129 | 4 3  | 6   | 0   | 0   | 0   | 6   | 0   | 0   | 18585 | 1121 |
| 2018-10-04 | 129 | 4 3  | 289 | 10  | 1   | 1   | 301 | 0   | 100 | 18886 | 1139 |
| 2018-10-04 | 129 | 9 3  | 255 | 3   | 2   | 9   | 270 | 1   | 100 | 19156 | 1155 |
| 2018-10-05 | 130 | 15 3 | 180 | 43  | 3   | 30  | 272 | 16  | 100 | 19428 | 1172 |
| 2018-10-05 | 130 | 15 3 | 19  | 1   | 0   | 0   | 21  | 1   | 0   | 19449 | 1173 |
| 2018-10-06 | 131 | 15 3 | 24  | 0   | 1   | 8   | 42  | 9   | 0   | 19491 | 1175 |
| 2018-10-06 | 131 | 15 3 | 139 | 2   | 12  | 41  | 240 | 46  | 100 | 19731 | 1190 |
| 2018-10-06 | 131 | 4 3  | 39  | 10  | 0   | 0   | 50  | 1   | 0   | 19781 | 1193 |
| 2018-10-06 | 131 | 4 3  | 48  | 20  | 7   | 5   | 84  | 4   | 0   | 19865 | 1198 |
| 2018-10-06 | 131 | 17 3 | 468 | 74  | 85  | 61  | 863 | 175 | 100 | 20728 | 1250 |
| 2018-10-07 | 132 | 4 3  | 29  | 0   | 0   | 4   | 33  | 0   | 0   | 20761 | 1252 |
| 2018-10-07 | 132 | 4 3  | 3   | 0   | 0   | 0   | 3   | 0   | 0   | 20764 | 1252 |
| 2018-10-07 | 132 | 15 3 | 277 | 6   | 29  | 50  | 390 | 28  | 100 | 21154 | 1276 |
| 2018-10-07 | 132 | 15 3 | 24  | 1   | 11  | 25  | 77  | 16  | 0   | 21231 | 1280 |
| 2018-10-08 | 133 | 9 3  | 318 | 12  | 72  | 72  | 538 | 64  | 100 | 21769 | 1313 |
| 2018-10-08 | 133 | 9 3  | 3   | 0   | 0   | 0   | 8   | 5   | 0   | 21777 | 1313 |
| 2018-10-08 | 133 | 15 3 | 67  | 1   | 1   | 7   | 83  | 7   | 67  | 21860 | 1318 |
| 2018-10-08 | 133 | 4 3  | 99  | 55  | 44  | 55  | 288 | 35  | 98  | 22148 | 1336 |
| 2018-10-09 | 134 | 15 3 | 18  | 1   | 0   | 0   | 20  | 1   | 0   | 22168 | 1337 |
| 2018-10-09 | 134 | 15 3 | 117 | 3   | 8   | 0   | 138 | 10  | 100 | 22306 | 1345 |
| 2018-10-09 | 134 | 17 3 | 49  | 3   | 10  | 33  | 111 | 16  | 0   | 22417 | 1352 |
| 2018-10-09 | 134 | 9 3  | 235 | 43  | 1   | 19  | 302 | 4   | 100 | 22719 | 1370 |
| 2018-10-10 | 135 | 4 3  | 6   | 1   | 0   | 0   | 7   | 0   | 0   | 22726 | 1370 |
| 2018-10-10 | 135 | 4 3  | 158 | 21  | 11  | 8   | 204 | 6   | 100 | 22930 | 1383 |
| 2018-10-10 | 135 | 15 3 | 120 | 11  | 4   | 41  | 176 | 0   | 100 | 23106 | 1393 |
| 2018-10-11 | 136 | 17 3 | 274 | 24  | 3   | 8   | 318 | 9   | 100 | 23424 | 1413 |
| 2018-10-11 | 136 | 4 3  | 34  | 0   | 0   | 0   | 34  | 0   | 0   | 23458 | 1415 |
| 2018-10-11 | 136 | 15 3 | 132 | 2   | 13  | 28  | 175 | 0   | 100 | 23633 | 1425 |
| 2018-10-12 | 137 | 4 3  | 2   | 0   | 0   | 0   | 2   | 0   | 0   | 23635 | 1425 |
| 2018-10-12 | 137 | 4 3  | 166 | 26  | 3   | 0   | 197 | 2   | 100 | 23832 | 1437 |
| 2018-10-12 | 137 | 4 3  | 97  | 31  | 21  | 62  | 251 | 40  | 96  | 24083 | 1452 |
| 2018-10-12 | 137 | 9 3  | 229 | 1   | 0   | 1   | 268 | 37  | 100 | 24351 | 1468 |
| 2018-10-12 | 137 | 15 3 | 367 | 7   | 17  | 12  | 455 | 52  | 100 | 24806 | 1496 |
| 2018-10-13 | 138 | 9 3  | 124 | 107 | 18  | 31  | 299 | 19  | 100 | 25105 | 1514 |
| 2018-10-13 | 138 | 15 3 | 338 | 16  | 21  | 40  | 417 | 2   | 100 | 25522 | 1539 |
| 2018-10-13 | 138 | 17 3 | 219 | 69  | 121 | 11  | 425 | 5   | 100 | 25947 | 1565 |
| 2018-10-14 | 139 | 15 3 | 91  | 34  | 2   | 0   | 127 | 0   | 81  | 26074 | 1572 |

|            |     |      |        |      |      |      |     |     |     |       |      |
|------------|-----|------|--------|------|------|------|-----|-----|-----|-------|------|
| 2018-10-14 | 139 | 9 3  | 60     | 61   | 6    | 11   | 138 | 0   | 60  | 26212 | 1581 |
| 2018-10-14 | 139 | 4 3  | 163    | 8    | 28   | 7    | 215 | 9   | 100 | 26427 | 1594 |
| 2018-10-15 | 140 | 4 3  | 91     | 0    | 0    | 0    | 93  | 2   | 91  | 26520 | 1599 |
| 2018-10-15 | 140 | 4 3  | 132    | 15   | 2    | 0    | 157 | 8   | 100 | 26677 | 1609 |
| 2018-10-15 | 140 | 15 3 | 0      | 0    | 0    | 0    | 7   | 7   | 0   | 26684 | 1609 |
| 2018-10-15 | 140 | 15 3 | 222    | 9    | 37   | 54   | 369 | 47  | 100 | 27053 | 1631 |
| 2018-10-15 | 140 | 15 3 | 14     | 0    | 3    | 4    | 21  | 0   | 0   | 27074 | 1633 |
| 2018-10-16 | 141 | 9 3  | 148    | 69   | 2    | 13   | 232 | 0   | 100 | 27306 | 1647 |
| 2018-10-16 | 141 | 4 3  | 22     | 6    | 0    | 10   | 43  | 5   | 0   | 27349 | 1649 |
| 2018-10-16 | 141 | 4 3  | 263    | 17   | 32   | 25   | 348 | 11  | 100 | 27697 | 1670 |
| 2018-10-17 | 142 | 17 3 | 193    | 66   | 9    | 13   | 285 | 4   | 100 | 27982 | 1687 |
| 2018-10-17 | 142 | 17 3 | 267    | 22   | 0    | 5    | 296 | 2   | 100 | 28278 | 1705 |
| 2018-10-17 | 142 | 9 3  | 67     | 121  | 22   | 14   | 224 | 0   | 67  | 28502 | 1719 |
| 2018-10-17 | 142 | 4 3  | 420    | 57   | 22   | 4    | 503 | 0   | 100 | 29005 | 1749 |
| 2018-10-17 | 142 | 15 3 | 1      | 0    | 0    | 0    | 1   | 0   | 0   | 29006 | 1749 |
| 2018-10-17 | 142 | 15 3 | 519    | 35   | 58   | 56   | 711 | 43  | 100 | 29717 | 1792 |
| 2018-10-18 | 143 | 9 3  | 50     | 0    | 5    | 0    | 58  | 3   | 50  | 29775 | 1796 |
| 2018-10-18 | 143 | 4 3  | 13     | 0    | 2    | 0    | 16  | 1   | 0   | 29791 | 1797 |
| 2018-10-19 | 144 | 15 3 | 47     | 0    | 2    | 20   | 74  | 5   | 0   | 29865 | 1801 |
| 2018-10-19 | 144 | 15 3 | 472    | 6    | 75   | 81   | 702 | 68  | 100 | 30567 | 1843 |
| 2018-10-19 | 144 | 9 3  | 68     | 1    | 1    | 5    | 76  | 1   | 68  | 30643 | 1848 |
| 2018-10-20 | 145 | 4 3  | 259    | 11   | 4    | 18   | 325 | 33  | 0   | 30968 | 1868 |
| 2018-10-20 | 145 | 17 3 | 165    | 14   | 3    | 5    | 208 | 21  | 0   | 31176 | 1880 |
| 2018-10-20 | 145 | 17 3 | 21     | 3    | 0    | 4    | 30  | 2   | 0   | 31206 | 1882 |
| 2018-10-20 | 145 | 9 3  | 353    | 85   | 13   | 1    | 452 | 0   | 0   | 31658 | 1909 |
| 2018-10-21 | 146 | 17 3 | 2      | 1    | 0    | 0    | 3   | 0   | 0   | 31661 | 1909 |
| 2018-10-21 | 146 | 17 3 | 211    | 0    | 1    | 0    | 213 | 1   | 0   | 31874 | 1922 |
| 2018-10-21 | 146 | 15 3 | 190    | 5    | 3    | 8    | 213 | 7   | 0   | 32087 | 1935 |
| 2018-10-21 | 146 | 4 3  | 78     | 3    | 0    | 2    | 102 | 19  | 0   | 32189 | 1941 |
| 2018-10-22 | 147 | 4 3  | 387    | 82   | 4    | 15   | 488 | 0   | 200 | 32677 | 1971 |
| 2018-10-22 | 147 | 4 3  | 160    | 20   | 9    | 16   | 208 | 3   | 100 | 32885 | 1983 |
| 2018-10-22 | 147 | 9 3  | 148    | 5    | 45   | 0    | 203 | 5   | 100 | 33088 | 1995 |
| 2018-10-22 | 147 | 15 3 | 8      | 0    | 0    | 0    | 8   | 0   | 0   | 33096 | 1996 |
| 2018-10-23 | 148 | 15 3 | 66     | 12   | 35   | 23   | 149 | 13  | 66  | 33245 | 2005 |
| 2018-10-23 | 148 | 15 3 | 2      | 0    | 5    | 0    | 7   | 0   | 0   | 33252 | 2005 |
| 2018-10-23 | 148 | 15 3 | 426    | 18   | 54   | 79   | 641 | 64  | 100 | 33893 | 2044 |
| 2018-10-24 | 149 | 17 3 | 350    | 21   | 6    | 19   | 403 | 7   | 100 | 34296 | 2068 |
| 2018-10-24 | 149 | 17 3 | 190    | 0    | 0    | 11   | 201 | 0   | 100 | 34497 | 2080 |
| 2018-10-24 | 149 | 9 3  | 141    | 0    | 0    | 47   | 188 |     | 0   | 34685 | 2092 |
| 2018-10-24 | 149 | 15 3 |        |      |      |      | 165 | 165 | 0   | 34850 | 2102 |
| 2018-10-24 | 149 | 17 3 |        |      |      |      | 24  | 24  | 0   | 34874 | 2103 |
| 2018-10-25 | 150 | 9 3  | 299.2  | 18.7 | 0    | 18.7 | 374 |     | 0   | 35248 | 2126 |
| 2018-10-25 | 150 | 9 3  | 31     | 7    | 0    | 1    | 54  | 15  | 0   | 35302 | 2129 |
| 2018-10-25 | 150 | 4 3  | 317.3  | 6.68 | 3.34 | 6.68 | 334 |     | 0   | 35636 | 2149 |
| 2018-10-25 | 150 | 15 3 | 92     | 0    | 0    | 92   | 184 |     | 0   | 35820 | 2160 |
| 2018-10-26 | 151 | 15 3 | 203.84 | 2.08 | 2.08 | 0    | 208 |     | 0   | 36028 | 2173 |
| 2018-10-26 | 151 | 4 3  | 145.35 | 1.53 | 0    | 6.12 | 153 |     | 0   | 36181 | 2182 |

|            |     |      |        |        |        |        |     |   |   |       |      |
|------------|-----|------|--------|--------|--------|--------|-----|---|---|-------|------|
| 2018-10-26 | 151 | 9 3  | 29     | 5      | 0      | 0      | 34  | 0 | 0 | 36215 | 2184 |
| 2018-10-27 | 152 | 4 3  | 224.25 | 37.375 | 37.375 | 0      | 299 | 0 | 0 | 36514 | 2202 |
| 2018-10-27 | 152 | 15 3 | 237    | 79     | 0      | 0      | 316 | 0 | 0 | 36830 | 2221 |
| 2018-10-27 | 152 | 17 3 | 19.5   | 3.25   | 0      | 3.25   | 26  | 0 | 0 | 36856 | 2223 |
| 2018-10-28 | 153 | 15 3 | 159.75 | 0      | 26.625 | 26.625 | 213 | 0 | 0 | 37069 | 2235 |
| 2018-10-28 | 153 | 9 3  | 117.75 | 39.25  | 0      | 0      | 157 | 0 | 0 | 37226 | 2245 |
| 2018-10-28 | 153 | 4 3  | 132.75 | 0      | 0      | 44.25  | 177 | 0 | 0 | 37403 | 2256 |
| 2018-10-28 | 153 | 4 3  | 14.85  | 14.85  | 14.85  | 0      | 45  | 0 | 0 | 37448 | 2258 |
| 2018-10-28 | 153 | 17 3 | 32     | 0      | 1      | 0      | 33  | 0 | 0 | 37481 | 2260 |
| 2018-10-28 | 153 | 17 3 | 121    | 60.5   | 0      | 60.5   | 242 | 0 | 0 | 37723 | 2275 |
| 2018-10-29 | 154 | 4 3  | 146.5  | 0      | 73.25  | 73.25  | 293 | 0 | 0 | 38016 | 2293 |
| 2018-10-29 | 154 | 15 3 | 27     | 0      | 5      | 6      | 38  | 0 | 0 | 38054 | 2295 |
| 2018-10-29 | 154 | 9 3  | 1      | 0      | 2      | 1      | 4   | 0 | 0 | 38058 | 2295 |
| 2018-10-29 | 154 | 9 3  | 3      | 0      | 2      | 1      | 6   | 0 | 0 | 38064 | 2295 |
| 2018-10-30 | 155 | 15 3 | 328.5  | 0      | 54.75  | 54.75  | 438 | 0 | 0 | 38502 | 2322 |
| 2018-10-30 | 155 | 15 3 | 100    | 3      | 3      | 0      | 107 | 1 | 0 | 38609 | 2328 |
| 2018-10-30 | 155 | 4 3  | 42     | 7      | 0      | 7      | 56  | 0 | 0 | 38665 | 2332 |
| 2018-10-30 | 155 | 9 3  | 18     | 0      | 2      | 0      | 25  | 5 | 0 | 38690 | 2333 |
| 2018-10-30 | 155 | 9 3  | 185.4  | 10.3   | 0      | 10.3   | 206 | 0 | 0 | 38896 | 2346 |
| 2018-10-31 | 156 | 9 3  | 127.5  | 34     | 8.5    | 0      | 170 | 0 | 0 | 39066 | 2356 |
| 2018-10-31 | 156 | 9 3  | 26     | 13     | 13     | 0      | 52  | 0 | 0 | 39118 | 2359 |
| 2018-10-31 | 156 | 4 3  | 119.7  | 17.1   | 0      | 34.2   | 171 | 0 | 0 | 39289 | 2369 |
| 2018-10-31 | 156 | 17 3 | 349    | 50     | 10     | 5      | 414 | 0 | 0 | 39703 | 2394 |
| 2018-11-01 | 157 | 9 3  | 133.5  | 0      | 0      | 44.5   | 178 | 0 | 0 | 39881 | 2405 |
| 2018-11-01 | 157 | 4 3  | 202.5  | 33.75  | 0      | 33.75  | 270 | 0 | 0 | 40151 | 2421 |
| 2018-11-01 | 157 | 15 3 | 181.44 | 21.6   | 2.16   | 10.8   | 216 | 0 | 0 | 40367 | 2434 |
| 2018-11-01 | 157 | 15 3 | 209.95 | 0      | 4.42   | 6.63   | 221 | 0 | 0 | 40588 | 2448 |
| 2018-11-02 | 158 | 15 3 | 67.5   | 3      | 3      | 1.5    | 75  | 0 | 0 | 40663 | 2452 |
| 2018-11-02 | 158 | 9 3  | 29     | 4      | 2      | 3      | 41  | 3 | 0 | 40704 | 2455 |
| 2018-11-02 | 158 | 9 3  | 49.5   | 49.5   | 0      | 0      | 99  | 0 | 0 | 40803 | 2461 |
| 2018-11-02 | 158 | 4 3  | 30     | 0      | 0      | 30     | 60  | 0 | 0 | 40863 | 2464 |
| 2018-11-02 | 158 | 4 3  | 135.75 | 14.48  | 14.48  | 14.48  | 181 | 0 | 0 | 41044 | 2475 |
| 2018-11-03 | 159 | 15 3 | 177.65 | 0      | 0      | 9.35   | 187 | 0 | 0 | 41231 | 2486 |
| 2018-11-03 | 159 | 17 3 | 9      | 1      | 0      | 0      | 10  | 0 | 0 | 41241 | 2487 |
| 2018-11-03 | 159 | 17 3 | 240    | 40     | 0      | 40     | 320 | 0 | 0 | 41561 | 2506 |
| 2018-11-03 | 159 | 9 3  | 1      | 0      | 1      | 0      | 2   | 0 | 0 | 41563 | 2506 |
| 2018-11-03 | 159 | 4 3  | 83.25  | 0      | 0      | 27.75  | 111 | 0 | 0 | 41674 | 2513 |
| 2018-11-04 | 160 | 9 3  | 141    | 47     | 0      | 0      | 188 | 0 | 0 | 41862 | 2525 |
| 2018-11-04 | 160 | 4 3  | 200.45 | 0      | 0      | 10.55  | 211 | 0 | 0 | 42073 | 2537 |
| 2018-11-04 | 160 | 15 3 | 72.2   | 0      | 3.8    | 0      | 76  | 0 | 0 | 42149 | 2542 |
| 2018-11-05 | 161 | 15 3 | 52.4   | 13.1   | 0      | 65.5   | 131 | 0 | 0 | 42280 | 2550 |
| 2018-11-05 | 161 | 9 3  | 80     | 64     | 16     | 0      | 160 | 0 | 0 | 42440 | 2559 |
| 2018-11-05 | 161 | 4 3  | 81.6   | 10.2   | 30.6   | 81.6   | 204 | 0 | 0 | 42644 | 2572 |
| 2018-11-05 | 161 | 17 3 | 207.2  | 0      | 0      | 88.8   | 296 | 0 | 0 | 42940 | 2590 |
| 2018-11-06 | 162 | 15 3 | 16     | 0      | 0      | 3      | 19  | 0 | 0 | 42959 | 2591 |
| 2018-11-06 | 162 | 15 3 | 404.8  | 0      | 50.6   | 50.6   | 506 | 0 | 0 | 43465 | 2621 |
| 2018-11-06 | 162 | 15 3 | 58.2   | 0      | 9.7    | 29.1   | 97  | 0 | 0 | 43562 | 2627 |

|            |     |       |        |      |       |       |     |    |     |       |      |
|------------|-----|-------|--------|------|-------|-------|-----|----|-----|-------|------|
| 2018-11-06 | 162 | 9 3   | 55.44  | 0    | 0     | 0.56  | 56  |    | 0   | 43618 | 2630 |
| 2018-11-06 | 162 | 9 3   | 0      | 1    | 0     | 0     | 1   | 0  | 0   | 43619 | 2630 |
| 2018-11-07 | 163 | 9 3   | 0      | 5    | 8     | 4     | 17  | 0  | 0   | 43636 | 2631 |
| 2018-11-07 | 163 | 4 3   | 5      | 0    | 0     | 0     | 5   | 0  | 0   | 43641 | 2632 |
| 2018-11-08 | 164 | 15 3  | 67.5   | 0    | 11.25 | 11.25 | 90  |    | 0   | 43731 | 2637 |
| 2018-11-08 | 164 | 17 3  | 89.3   | 0    | 0     | 4.7   | 94  |    | 0   | 43825 | 2643 |
| 2018-11-09 | 165 | 15 3  | 108    | 13.5 | 6.75  | 6.75  | 135 |    | 0   | 43960 | 2651 |
| 2018-11-09 | 165 | 9 3   | 21     | 1    | 0     | 0     | 22  |    | 0   | 43982 | 2652 |
| 2018-11-09 | 165 | 9 3   | 168.8  | 42.2 | 0     | 0     | 211 |    | 0   | 44193 | 2665 |
| 2018-11-09 | 165 | 17 3  | 294.81 | 9.51 | 9.51  | 3.17  | 317 |    | 0   | 44510 | 2684 |
| 2018-11-09 | 165 | 17 3  | 139.65 | 0    | 0     | 7.35  | 147 |    | 0   | 44657 | 2693 |
| 2018-11-09 | 165 | 4 3   | 7      | 0    | 6     | 0     | 13  |    | 0   | 44670 | 2694 |
| 2018-11-09 | 165 | 4 3   | 28     | 6    | 4     | 0     | 38  |    | 0   | 44708 | 2696 |
| 2018-11-09 | 165 | 4 3   | 28     | 0    | 1     | 0     | 29  |    | 0   | 44737 | 2698 |
| 2018-11-10 | 166 | 9 3   | 5      | 2    | 0     | 0     | 7   | 0  | 0   | 44744 | 2698 |
| 2018-11-10 | 166 | 9 3   | 34     | 0    | 1     | 1     | 38  | 2  | 0   | 44782 | 2701 |
| 2018-11-10 | 166 | 9 3   | 54.6   | 45.5 | 10.4  | 0     | 130 |    | 0   | 44912 | 2708 |
| 2018-11-10 | 166 | 4 3   | 231    | 16.5 | 16.5  | 66    | 330 |    | 0   | 45242 | 2728 |
| 2018-11-10 | 166 | 4 3   | 4      | 1    | 0     | 1     | 8   | 2  | 0   | 45250 | 2729 |
| 2018-11-10 | 166 | 4 3   | 11     | 0    | 0     | 0     | 11  | 0  | 0   | 45261 | 2729 |
| 2018-11-10 | 166 | 15 3  | 23     | 1    | 0     | 1     | 25  |    | 0   | 45286 | 2731 |
| 2018-11-11 | 167 | 4 3   | 24     | 1    | 1     | 0     | 31  | 5  | 0   | 45317 | 2733 |
| 2018-11-11 | 167 | 17 3  | 11.9   | 23.8 | 23.8  | 59.5  | 238 |    | 0   | 45555 | 2747 |
| 2018-11-12 | 168 | 17 3  | 16     | 0    | 0     | 0     | 4   |    | 0   | 45559 | 2747 |
| 2018-11-12 | 168 | 17 3  | 443    | 0    | 0     | 443   | 886 |    | 0   | 46445 | 2801 |
| 2018-11-12 | 168 | 4 3   | 47     | 2    | 1     | 0     | 50  |    | 0   | 46495 | 2804 |
| 2018-08-26 | 90  |       |        |      |       |       |     |    |     | 0     | 0    |
| 2018-08-28 | 92  | 12 31 | 2      | 6    | 0     | 0     | 8   | 0  | 0   | 8     | 0    |
| 2018-08-29 | 93  |       |        |      |       |       |     |    |     | 8     | 0    |
| 2018-09-09 | 104 | 8 31  | 0      | 4    | 0     | 0     | 4   | 0  | 0   | 12    | 1    |
| 2018-09-09 | 104 | 8 31  | 1      | 0    | 0     | 0     | 1   | 0  | 0   | 13    | 1    |
| 2018-09-09 | 104 | 12 31 | 159    | 23   | 5     | 23    | 215 | 5  | 100 | 228   | 13   |
| 2018-09-09 | 104 | 12 31 | 0      | 1    | 0     | 0     | 1   | 0  | 0   | 229   | 13   |
| 2018-09-10 | 105 | 12 31 | 127    | 0    | 4     | 26    | 157 | 0  | 100 | 386   | 22   |
| 2018-09-10 | 105 | 8 31  | 84     | 0    | 25    | 47    | 159 | 3  | 84  | 545   | 32   |
| 2018-09-11 | 106 | 8 31  | 326    | 11   | 35    | 21    | 393 | 0  | 100 | 938   | 54   |
| 2018-09-12 | 107 | 12 31 | 149    | 19   | 0     | 132   | 309 | 9  | 100 | 1247  | 72   |
| 2018-09-13 | 108 | 8 31  | 231    | 9    | 32    | 127   | 399 | 0  | 100 | 1646  | 95   |
| 2018-09-13 | 108 | 12 31 | 108    | 0    | 36    | 14    | 158 | 0  | 100 | 1804  | 104  |
| 2018-09-13 | 108 | 8 31  | 136    | 2    | 0     | 1     | 149 | 10 | 100 | 1953  | 113  |
| 2018-09-14 | 109 | 8 31  | 195    | 0    | 7     | 32    | 234 | 0  | 100 | 2187  | 127  |
| 2018-09-14 | 109 | 20 31 | 34     | 0    | 12    | 27    | 75  | 2  | 0   | 2262  | 131  |
| 2018-09-15 | 110 | 20 31 | 87     | 0    | 4     | 0     | 91  | 0  | 100 | 2353  | 136  |
| 2018-09-15 | 110 | 12 31 | 220    | 0    | 1     | 10    | 236 | 5  | 100 | 2589  | 150  |
| 2018-09-15 | 110 | 8 31  | 313    | 0    | 3     | 2     | 324 | 6  | 100 | 2913  | 169  |
| 2018-09-16 | 111 | 12 31 | 127    | 5    | 4     | 3     | 145 | 6  | 100 | 3058  | 177  |
| 2018-09-16 | 111 | 5 31  | 112    | 0    | 27    | 12    | 151 | 0  | 100 | 3209  | 186  |

|            |     |       |     |    |     |     |     |    |     |       |     |
|------------|-----|-------|-----|----|-----|-----|-----|----|-----|-------|-----|
| 2018-09-17 | 112 | 12 31 | 106 | 0  | 8   | 1   | 164 | 49 | 100 | 3373  | 195 |
| 2018-09-17 | 112 | 8 31  | 278 | 0  | 1   | 8   | 287 | 0  | 100 | 3660  | 212 |
| 2018-09-17 | 112 | 8 31  | 20  | 0  | 0   | 0   | 20  | 0  | 0   | 3680  | 213 |
| 2018-09-18 | 113 | 12 31 | 218 | 0  | 15  | 70  | 319 | 16 | 100 | 3999  | 231 |
| 2018-09-18 | 113 | 8 31  | 537 | 8  | 114 | 191 | 850 | 0  | 100 | 4849  | 281 |
| 2018-09-18 | 113 | 5 31  | 147 | 22 | 2   | 7   | 179 | 1  | 100 | 5028  | 291 |
| 2018-09-19 | 114 | 12 31 | 299 | 2  | 1   | 0   | 302 | 0  | 100 | 5330  | 308 |
| 2018-09-19 | 114 | 5 31  | 87  | 2  | 10  | 102 | 206 | 5  | 87  | 5536  | 320 |
| 2018-09-20 | 115 | 12 31 | 138 | 1  | 2   | 2   | 149 | 6  | 100 | 5685  | 329 |
| 2018-09-20 | 115 | 5 31  | 120 | 7  | 0   | 8   | 136 | 1  | 100 | 5821  | 337 |
| 2018-09-21 | 116 | 8 31  | 714 | 5  | 2   | 3   | 725 | 1  | 100 | 6546  | 379 |
| 2018-09-21 | 116 | 8 31  | 4   | 1  | 0   | 0   | 6   | 1  | 0   | 6552  | 379 |
| 2018-09-21 | 116 | 8 31  | 9   | 0  | 0   | 0   | 9   | 0  | 0   | 6561  | 380 |
| 2018-09-21 | 116 | 5 31  | 70  | 5  | 0   | 0   | 77  | 2  | 70  | 6638  | 384 |
| 2018-09-21 | 116 | 5 31  | 12  | 1  | 0   | 0   | 13  | 0  | 0   | 6651  | 385 |
| 2018-09-22 | 117 | 8 31  | 83  | 25 | 13  | 39  | 174 | 14 | 83  | 6825  | 395 |
| 2018-09-22 | 117 | 8 31  | 205 | 23 | 56  | 27  | 341 | 30 | 100 | 7166  | 415 |
| 2018-09-23 | 118 | 8 31  | 0   | 0  | 0   | 0   | 1   | 1  | 0   | 7167  | 415 |
| 2018-09-23 | 118 | 8 31  | 107 | 36 | 79  | 77  | 397 | 98 | 100 | 7564  | 438 |
| 2018-09-24 | 119 | 12 31 | 0   | 5  | 7   | 0   | 22  | 10 | 0   | 7586  | 439 |
| 2018-09-24 | 119 | 12 31 | 0   | 5  | 0   | 0   | 29  | 24 | 0   | 7615  | 441 |
| 2018-09-24 | 119 | 8 31  | 9   | 5  | 1   | 3   | 18  | 0  | 0   | 7633  | 442 |
| 2018-09-24 | 119 | 8 31  | 181 | 3  | 1   | 0   | 185 | 0  | 100 | 7818  | 452 |
| 2018-09-25 | 120 | 12 31 | 737 | 3  | 7   | 45  | 792 | 0  | 100 | 8610  | 498 |
| 2018-09-25 | 120 | 8 31  | 148 | 1  | 1   | 1   | 156 | 5  | 100 | 8766  | 507 |
| 2018-09-25 | 120 | 8 31  | 298 | 17 | 1   | 5   | 321 | 0  | 100 | 9087  | 526 |
| 2018-09-25 | 120 | 5 31  | 392 | 3  | 4   | 5   | 417 | 13 | 100 | 9504  | 550 |
| 2018-09-26 | 121 | 20 31 | 0   | 0  | 22  | 0   | 22  | 0  | 0   | 9526  | 551 |
| 2018-09-26 | 121 | 8 31  | 64  | 0  | 4   | 13  | 81  | 0  | 64  | 9607  | 556 |
| 2018-09-26 | 121 | 5 31  | 146 | 0  | 1   | 18  | 165 | 0  | 100 | 9772  | 566 |
| 2018-09-26 | 121 | 12 31 | 210 | 1  | 4   | 28  | 243 | 0  | 100 | 10015 | 580 |
| 2018-09-27 | 122 | 8 31  | 5   | 0  | 0   | 0   | 5   | 0  | 0   | 10020 | 580 |
| 2018-09-27 | 122 | 8 31  | 133 | 7  | 0   | 1   | 144 | 3  | 100 | 10164 | 588 |
| 2018-09-27 | 122 | 12 31 | 228 | 28 | 3   | 2   | 261 | 0  | 100 | 10425 | 603 |
| 2018-09-27 | 122 | 20 31 | 86  | 0  | 18  | 59  | 172 | 9  | 86  | 10597 | 613 |
| 2018-09-28 | 123 | 5 31  | 144 | 10 | 58  | 36  | 248 | 0  | 100 | 10845 | 628 |
| 2018-09-28 | 123 | 8 31  | 452 | 1  | 15  | 89  | 559 | 2  | 100 | 11404 | 660 |
| 2018-09-29 | 124 | 5 31  | 86  | 2  | 0   | 0   | 89  | 1  | 86  | 11493 | 665 |
| 2018-09-29 | 124 | 8 31  | 72  | 55 | 21  | 8   | 192 | 36 | 72  | 11685 | 676 |
| 2018-09-29 | 124 | 12 31 | 353 | 6  | 2   | 4   | 381 | 16 | 100 | 12066 | 698 |
| 2018-09-30 | 125 | 5 31  | 1   | 0  | 0   | 0   | 1   | 0  | 0   | 12067 | 698 |
| 2018-09-30 | 125 | 12 31 | 620 | 1  | 4   | 6   | 631 | 0  | 100 | 12698 | 735 |
| 2018-09-30 | 125 | 8 31  | 216 | 10 | 1   | 22  | 261 | 12 | 100 | 12959 | 750 |
| 2018-09-30 | 125 | 8 31  | 1   | 0  | 0   | 1   | 2   | 0  | 0   | 12961 | 750 |
| 2018-10-01 | 126 | 8 31  | 2   | 2  | 0   | 0   | 4   | 0  | 0   | 12965 | 750 |
| 2018-10-01 | 126 | 8 31  | 449 | 10 | 30  | 48  | 537 | 0  | 100 | 13502 | 781 |
| 2018-10-01 | 126 | 5 31  | 327 | 5  | 36  | 57  | 437 | 12 | 100 | 13939 | 807 |



|            |     |       |     |    |    |     |     |    |     |       |      |
|------------|-----|-------|-----|----|----|-----|-----|----|-----|-------|------|
| 2018-10-02 | 127 | 8 31  | 7   | 0  | 1  | 1   | 10  | 1  | 0   | 13949 | 807  |
| 2018-10-02 | 127 | 12 31 | 122 | 5  | 19 | 51  | 215 | 18 | 100 | 14164 | 820  |
| 2018-10-03 | 128 | 20 31 | 88  | 0  | 0  | 16  | 107 | 3  | 88  | 14271 | 826  |
| 2018-10-03 | 128 | 12 31 | 2   | 0  | 0  | 0   | 2   | 0  | 0   | 14273 | 826  |
| 2018-10-04 | 129 | 12 31 | 430 | 20 | 80 | 146 | 719 | 43 | 100 | 14992 | 868  |
| 2018-10-04 | 129 | 12 31 | 15  | 0  | 0  | 5   | 21  | 1  | 0   | 15013 | 869  |
| 2018-10-04 | 129 | 20 31 | 188 | 0  | 5  | 2   | 206 | 11 | 100 | 15219 | 881  |
| 2018-10-04 | 129 | 8 31  | 0   | 0  | 13 | 116 | 135 | 6  | 0   | 15354 | 889  |
| 2018-10-04 | 129 | 5 31  | 159 | 21 | 29 | 35  | 254 | 10 | 100 | 15608 | 903  |
| 2018-10-05 | 130 | 12 31 | 150 | 3  | 28 | 58  | 290 | 51 | 100 | 15898 | 920  |
| 2018-10-05 | 130 | 8 31  | 167 | 8  | 3  | 2   | 180 | 0  | 100 | 16078 | 931  |
| 2018-10-05 | 130 | 8 31  | 229 | 24 | 21 | 17  | 291 | 0  | 100 | 16369 | 947  |
| 2018-10-06 | 131 | 8 31  | 220 | 52 | 49 | 86  | 467 | 60 | 100 | 16836 | 974  |
| 2018-10-06 | 131 | 5 31  | 170 | 2  | 7  | 3   | 183 | 1  | 100 | 17019 | 985  |
| 2018-10-07 | 132 | 8 31  | 80  | 2  | 8  | 5   | 101 | 6  | 80  | 17120 | 991  |
| 2018-10-07 | 132 | 5 31  | 61  | 12 | 64 | 37  | 217 | 43 | 61  | 17337 | 1003 |
| 2018-10-07 | 132 | 5 31  | 1   | 0  | 2  | 1   | 4   | 0  | 0   | 17341 | 1004 |
| 2018-10-08 | 133 | 12 31 | 170 | 4  | 2  | 3   | 180 | 1  | 100 | 17521 | 1014 |
| 2018-10-08 | 133 | 20 31 | 2   | 0  | 0  | 43  | 48  | 3  | 0   | 17569 | 1017 |
| 2018-10-08 | 133 | 20 31 | 3   | 1  | 9  | 54  | 70  | 3  | 0   | 17639 | 1021 |
| 2018-10-08 | 133 | 8 31  | 106 | 3  | 1  | 3   | 115 | 2  | 138 | 17754 | 1028 |
| 2018-10-08 | 133 | 8 31  | 156 | 65 | 63 | 53  | 366 | 29 | 100 | 18120 | 1049 |
| 2018-10-09 | 134 | 12 31 | 233 | 11 | 32 | 65  | 351 | 10 | 100 | 18471 | 1069 |
| 2018-10-09 | 134 | 20 31 | 20  | 0  | 1  | 1   | 22  | 0  | 0   | 18493 | 1070 |
| 2018-10-09 | 134 | 20 31 | 167 | 33 | 6  | 106 | 352 | 40 | 100 | 18845 | 1091 |
| 2018-10-09 | 134 | 8 31  | 281 | 12 | 11 | 26  | 330 | 0  | 100 | 19175 | 1110 |
| 2018-10-10 | 135 | 12 31 | 48  | 5  | 3  | 14  | 77  | 7  | 0   | 19252 | 1114 |
| 2018-10-10 | 135 | 12 31 | 234 | 0  | 1  | 10  | 251 | 6  | 100 | 19503 | 1129 |
| 2018-10-10 | 135 | 8 31  | 282 | 2  | 4  | 37  | 329 | 4  | 100 | 19832 | 1148 |
| 2018-10-11 | 136 | 5 31  | 189 | 14 | 10 | 4   | 245 | 28 | 100 | 20077 | 1162 |
| 2018-10-11 | 136 | 12 31 | 34  | 1  | 0  | 0   | 35  | 0  | 0   | 20112 | 1164 |
| 2018-10-12 | 137 | 8 31  | 94  | 1  | 0  | 10  | 114 | 9  | 94  | 20226 | 1171 |
| 2018-10-12 | 137 | 8 31  | 13  | 6  | 0  | 3   | 24  | 2  | 0   | 20250 | 1172 |
| 2018-10-13 | 138 | 8 31  | 23  | 14 | 23 | 70  | 134 | 4  | 0   | 20384 | 1180 |
| 2018-10-13 | 138 | 8 31  | 216 | 4  | 15 | 100 | 335 | 0  | 100 | 20719 | 1199 |
| 2018-10-13 | 138 | 12 31 | 847 | 14 | 12 | 13  | 886 | 0  | 100 | 21605 | 1250 |
| 2018-10-13 | 138 | 20 31 | 113 | 3  | 13 | 32  | 165 | 4  | 100 | 21770 | 1260 |
| 2018-10-14 | 139 | 20 31 | 49  | 0  | 6  | 2   | 58  | 1  | 49  | 21828 | 1263 |
| 2018-10-14 | 139 | 20 31 | 10  | 0  | 2  | 0   | 12  | 0  | 0   | 21840 | 1264 |
| 2018-10-14 | 139 | 8 31  | 5   | 0  | 0  | 0   | 5   | 0  | 0   | 21845 | 1264 |
| 2018-10-14 | 139 | 8 31  | 233 | 21 | 22 | 61  | 337 | 0  | 100 | 22182 | 1284 |
| 2018-10-15 | 140 | 5 31  | 158 | 0  | 0  | 0   | 160 | 2  | 100 | 22342 | 1293 |
| 2018-10-15 | 140 | 20 31 | 214 | 8  | 16 | 1   | 260 | 21 | 100 | 22602 | 1308 |
| 2018-10-15 | 140 | 12 31 | 250 | 2  | 44 | 66  | 379 | 17 | 100 | 22981 | 1330 |
| 2018-10-16 | 141 | 5 31  | 40  | 0  | 0  | 8   | 54  | 6  | 0   | 23035 | 1333 |
| 2018-10-16 | 141 | 8 31  | 5   | 1  | 0  | 0   | 6   | 0  | 0   | 23041 | 1334 |
| 2018-10-16 | 141 | 8 31  | 59  | 3  | 6  | 2   | 70  | 0  | 59  | 23111 | 1338 |

|            |     |       |        |       |        |        |     |    |     |       |      |
|------------|-----|-------|--------|-------|--------|--------|-----|----|-----|-------|------|
| 2018-10-16 | 141 | 5 31  | 102    | 0     | 9      | 25     | 143 | 7  | 0   | 23254 | 1346 |
| 2018-10-17 | 142 | 20 31 | 201    | 2     | 3      | 7      | 221 | 8  | 100 | 23475 | 1359 |
| 2018-10-17 | 142 | 20 31 | 96     | 1     | 2      | 9      | 109 | 1  | 96  | 23584 | 1365 |
| 2018-10-18 | 143 | 12 31 | 249    | 3     | 5      | 39     | 308 | 12 | 100 | 23892 | 1383 |
| 2018-10-18 | 143 | 12 31 | 15     | 0     | 0      | 1      | 17  | 1  | 0   | 23909 | 1384 |
| 2018-10-18 | 143 | 8 31  | 4      | 1     | 2      | 0      | 7   | 0  | 0   | 23916 | 1384 |
| 2018-10-18 | 143 | 8 31  | 25     | 0     | 31     | 5      | 61  | 0  | 0   | 23977 | 1388 |
| 2018-10-19 | 144 | 12 31 | 377    | 8     | 38     | 123    | 587 | 41 | 100 | 24564 | 1422 |
| 2018-10-19 | 144 | 5 31  | 143    | 0     | 11     | 24     | 197 | 19 | 100 | 24761 | 1433 |
| 2018-10-19 | 144 | 8 31  | 608    | 76    | 49     | 42     | 775 | 0  | 200 | 25536 | 1478 |
| 2018-10-19 | 144 | 8 31  | 167    | 24    | 5      | 21     | 224 | 7  | 100 | 25760 | 1491 |
| 2018-10-19 | 144 | 5 31  | 73     | 0     | 0      | 1      | 81  | 7  | 73  | 25841 | 1496 |
| 2018-10-20 | 145 | 5 31  | 48     | 0     | 0      | 9      | 60  | 3  | 0   | 25901 | 1499 |
| 2018-10-20 | 145 | 8 31  | 13     | 8     | 1      | 0      | 24  | 2  | 0   | 25925 | 1500 |
| 2018-10-21 | 146 | 8 31  | 89     | 1     | 0      | 1      | 91  | 0  | 0   | 26016 | 1506 |
| 2018-10-21 | 146 | 20 31 | 274    | 5     | 2      | 3      | 293 | 9  | 100 | 26309 | 1523 |
| 2018-10-21 | 146 | 20 31 | 259    | 4     | 12     | 31     | 309 | 3  | 100 | 26618 | 1541 |
| 2018-10-21 | 146 | 5 31  | 313    | 6     | 3      | 9      | 331 | 0  | 0   | 26949 | 1560 |
| 2018-10-22 | 147 | 5 31  | 36     | 0     | 6      | 8      | 56  | 6  | 0   | 27005 | 1563 |
| 2018-10-22 | 147 | 8 31  | 109    | 19    | 62     | 94     | 318 | 34 | 100 | 27323 | 1581 |
| 2018-10-23 | 148 | 8 31  | 48     | 9     | 5      | 11     | 73  | 0  | 0   | 27396 | 1586 |
| 2018-10-24 | 149 | 8 31  | 172    | 86    | 86     | 0      | 344 |    | 0   | 27740 | 1605 |
| 2018-10-24 | 149 | 12 31 | 21     | 1     | 0      | 6      | 28  | 0  | 0   | 27768 | 1607 |
| 2018-10-24 | 149 | 12 31 | 19     | 2     | 0      | 2      | 23  | 0  | 0   | 27791 | 1608 |
| 2018-10-25 | 150 | 8 31  | 0      | 0     | 0      | 0      | 1   | 1  | 0   | 27792 | 1608 |
| 2018-10-25 | 150 | 12 31 | 4      | 0     | 0      | 0      | 4   | 0  | 0   | 27796 | 1609 |
| 2018-10-25 | 150 | 12 31 | 534    | 9     | 164    | 158    | 904 | 39 | 200 | 28700 | 1661 |
| 2018-10-25 | 150 | 12 31 | 19     | 0     | 18     | 0      | 37  | 0  | 0   | 28737 | 1663 |
| 2018-10-25 | 150 | 20 31 | 153    | 5     | 0      | 39     | 197 | 0  | 0   | 28934 | 1675 |
| 2018-10-26 | 151 | 12 31 | 263.2  | 62.51 | 3.29   | 0      | 329 |    | 0   | 29263 | 1694 |
| 2018-10-26 | 151 | 5 31  | 33     | 0     | 1      | 5      | 61  | 22 | 0   | 29324 | 1697 |
| 2018-10-26 | 151 | 8 31  | 353.25 | 0     | 58.875 | 58.875 | 471 |    | 0   | 29795 | 1724 |
| 2018-10-26 | 151 | 20 31 | 313    | 0     | 20     | 1      | 334 | 0  | 0   | 30129 | 1744 |
| 2018-10-27 | 152 | 5 31  | 37     | 1     | 3      | 0      | 41  | 0  | 0   | 30170 | 1746 |
| 2018-10-27 | 152 | 5 31  | 23     | 0     | 2      | 2      | 27  | 0  | 0   | 30197 | 1748 |
| 2018-10-28 | 153 | 5 31  | 46     | 0     | 0      | 0      | 46  |    | 0   | 30243 | 1750 |
| 2018-10-29 | 154 | 5 31  | 134    | 5     | 53     | 161    | 353 | 0  | 100 | 30596 | 1771 |
| 2018-10-29 | 154 | 12 31 | 5      | 0     | 0      | 0      | 5   | 0  | 0   | 30601 | 1771 |
| 2018-10-29 | 154 | 12 31 | 160.5  | 26.75 | 0      | 26.75  | 214 |    | 0   | 30815 | 1783 |
| 2018-10-30 | 155 | 12 31 | 284    | 0     | 142    | 142    | 568 |    | 0   | 31383 | 1816 |
| 2018-10-30 | 155 | 20 31 | 124.5  | 0     | 62.25  | 62.25  | 249 |    | 0   | 31632 | 1831 |
| 2018-10-30 | 155 | 20 31 | 227.5  | 16.25 | 16.25  | 65     | 325 |    | 0   | 31957 | 1850 |
| 2018-10-30 | 155 | 8 31  | 16     | 0     | 1      | 0      | 17  | 0  | 0   | 31974 | 1851 |
| 2018-10-30 | 155 | 8 31  | 4      | 13    | 0      | 1      | 20  | 2  | 0   | 31994 | 1852 |
| 2018-10-30 | 155 | 8 31  | 325.5  | 0     | 0      | 108.5  | 434 |    | 0   | 32428 | 1877 |
| 2018-10-30 | 155 | 5 31  | 10     | 0     | 0      | 0      | 10  | 0  | 0   | 32438 | 1877 |
| 2018-10-31 | 156 | 8 31  | 6      | 0     | 0      | 1      | 8   | 1  | 0   | 32446 | 1878 |

|            |     |       |        |       |       |        |     |    |    |       |      |
|------------|-----|-------|--------|-------|-------|--------|-----|----|----|-------|------|
| 2018-10-31 | 156 | 5 31  | 28.8   | 1.6   | 1.6   | 0      | 32  |    | 0  | 32478 | 1880 |
| 2018-10-31 | 156 | 5 31  | 10     | 0     | 0     | 0      | 10  |    | 0  | 32488 | 1880 |
| 2018-10-31 | 156 | 20 31 | 12     | 0     | 0     | 0      | 12  |    | 0  | 32500 | 1881 |
| 2018-10-31 | 156 | 20 31 | 23.2   | 0     | 5.8   | 0      | 29  |    | 0  | 32529 | 1883 |
| 2018-10-31 | 156 | 12 31 | 13     | 7     | 0     | 0      | 20  | 0  | 0  | 32549 | 1884 |
| 2018-10-31 | 156 | 12 31 | 26     | 7     | 9     | 6      | 48  |    | 0  | 32597 | 1887 |
| 2018-11-01 | 157 | 5 31  | 60     | 3     | 11    | 17     | 109 | 18 | 60 | 32706 | 1893 |
| 2018-11-01 | 157 | 12 31 | 1      | 1     | 0     | 1      | 4   | 1  | 0  | 32710 | 1893 |
| 2018-11-01 | 157 | 12 31 | 1      | 0     | 0     | 0      | 1   | 0  | 0  | 32711 | 1893 |
| 2018-11-02 | 158 | 5 31  | 137    | 0     | 0     | 15     | 152 |    | 0  | 32863 | 1902 |
| 2018-11-02 | 158 | 5 31  | 7      | 0     | 3     | 1      | 11  | 0  | 0  | 32874 | 1903 |
| 2018-11-03 | 159 | 12 31 | 246.75 | 0     | 0     | 82.25  | 329 |    | 0  | 33203 | 1922 |
| 2018-11-03 | 159 | 12 31 | 84     | 1     | 0     | 2      | 87  |    | 0  | 33290 | 1927 |
| 2018-11-03 | 159 | 8 31  | 1      | 1     | 0     | 1      | 3   | 0  | 0  | 33293 | 1927 |
| 2018-11-03 | 159 | 8 31  | 183    | 91.5  | 0     | 91.5   | 366 |    | 0  | 33659 | 1948 |
| 2018-11-03 | 159 | 5 31  | 6      | 0     | 0     | 0      | 7   | 1  | 0  | 33666 | 1948 |
| 2018-11-03 | 159 | 5 31  | 12     | 2     | 0     | 3      | 28  | 11 | 0  | 33694 | 1950 |
| 2018-11-04 | 160 | 12 31 | 46     | 2     | 0     | 0      | 48  |    | 0  | 33742 | 1953 |
| 2018-11-04 | 160 | 12 31 | 551.25 | 0     | 0     | 183.75 | 735 |    | 0  | 34477 | 1995 |
| 2018-11-04 | 160 | 5 31  | 81     | 81    | 0     | 0      | 162 |    | 0  | 34639 | 2005 |
| 2018-11-04 | 160 | 8 31  | 146.3  | 0     | 0     | 7.7    | 154 |    | 0  | 34793 | 2014 |
| 2018-11-05 | 161 | 8 31  | 140.4  | 23.4  | 11.7  | 35.1   | 234 |    | 0  | 35027 | 2027 |
| 2018-11-05 | 161 | 5 31  | 220.5  | 14.7  | 29.4  | 29.4   | 294 |    | 0  | 35321 | 2044 |
| 2018-11-05 | 161 | 5 31  | 11     | 0     | 0     | 2      | 13  | 0  | 0  | 35334 | 2045 |
| 2018-11-05 | 161 | 20 31 | 272.4  | 22.7  | 22.7  | 136.2  | 454 |    | 0  | 35788 | 2071 |
| 2018-11-06 | 162 | 8 31  | 178.2  | 19.8  | 0     | 0      | 198 |    | 0  | 35986 | 2083 |
| 2018-11-06 | 162 | 8 31  | 3      | 0     | 0     | 0      | 3   | 0  | 0  | 35989 | 2083 |
| 2018-11-06 | 162 | 20 31 | 164    | 0     | 3     | 0      | 167 |    | 0  | 36156 | 2093 |
| 2018-11-06 | 162 | 5 31  | 182.4  | 0     | 0     | 9.6    | 192 |    | 0  | 36348 | 2104 |
| 2018-11-06 | 162 | 5 31  | 10     | 0     | 4     | 1      | 15  | 0  | 0  | 36363 | 2105 |
| 2018-11-07 | 163 | 8 31  | 2      | 2     | 2     | 0      | 6   | 0  | 0  | 36369 | 2105 |
| 2018-11-07 | 163 | 8 31  | 238.7  | 51.15 | 51.15 | 0      | 341 |    | 0  | 36710 | 2125 |
| 2018-11-07 | 163 | 5 31  | 71.4   | 10.2  | 20.4  | 0      | 102 |    | 0  | 36812 | 2131 |
| 2018-11-08 | 164 | 8 31  | 152    | 0     | 0     | 8      | 160 |    | 0  | 36972 | 2140 |
| 2018-11-08 | 164 | 8 31  | 4      | 0     | 0     | 6      | 10  | 0  | 0  | 36982 | 2140 |
| 2018-11-08 | 164 | 12 31 | 227.05 | 0     | 11.95 | 0      | 239 |    | 0  | 37221 | 2154 |
| 2018-11-08 | 164 | 12 31 | 7      | 0     | 4     | 0      | 11  | 0  | 0  | 37232 | 2155 |
| 2018-11-09 | 165 | 12 31 | 9      | 2     | 0     | 0      | 11  | 0  | 0  | 37243 | 2155 |
| 2018-11-09 | 165 | 12 31 | 362.4  | 60.4  | 60.4  | 120.8  | 604 |    | 0  | 37847 | 2190 |
| 2018-11-10 | 166 | 5 31  | 0      | 0     | 0     | 0      | 1   | 1  | 0  | 37848 | 2190 |
| 2018-11-10 | 166 | 8 31  | 0      | 0     | 0     | 0      | 1   | 1  | 0  | 37849 | 2191 |
| 2018-11-10 | 166 | 12 31 | 30     | 1.2   | 0.6   | 28.2   | 60  |    | 0  | 37909 | 2194 |
| 2018-11-10 | 166 | 12 31 | 105.6  | 0     | 9.6   | 76.8   | 192 |    | 0  | 38101 | 2205 |
| 2018-11-10 | 166 | 8 31  | 13     | 3     | 0     | 2      | 19  | 1  | 0  | 38120 | 2206 |
| 2018-11-10 | 166 | 5 31  | 3      | 3     | 0     | 0      | 6   | 0  | 0  | 38126 | 2207 |
| 2018-11-11 | 167 | 8 31  | 262.08 | 33.6  | 33.6  | 6.72   | 336 |    | 0  | 38462 | 2226 |
| 2018-11-11 | 167 | 5 31  | 14     | 0     | 0     | 0      | 16  | 2  | 0  | 38478 | 2227 |

|            |     |        |        |      |      |      |     |     |     |       |      |
|------------|-----|--------|--------|------|------|------|-----|-----|-----|-------|------|
| 2018-11-11 | 167 | 20 31  | 29     | 2    | 0    | 3    | 44  | 10  | 0   | 38522 | 2229 |
| 2018-11-12 | 168 | 8 31   | 150.1  | 7.9  | 0    | 0    | 158 |     | 0   | 38680 | 2239 |
| 2018-11-12 | 168 | 20 31  | 149.38 | 1.54 | 1.54 | 1.54 | 154 |     | 0   | 38834 | 2248 |
| 2018-08-26 | 90  |        |        |      |      |      |     |     |     | 0     | 0    |
| 2018-08-29 | 93  |        |        |      |      |      |     |     |     | 0     | 0    |
| 2018-08-31 | 95  | 18 322 | 160    | 4    | 12   | 35   | 214 | 3   | 100 | 214   | 17   |
| 2018-08-31 | 95  | 18 322 | 5      | 0    | 0    | 0    | 5   | 0   | 0   | 219   | 17   |
| 2018-09-01 | 96  | 18 322 | 334    | 0    | 4    | 25   | 363 | 0   | 100 | 582   | 45   |
| 2018-09-05 | 100 | 18 322 | 231    | 18   | 5    | 31   | 306 | 21  | 100 | 888   | 69   |
| 2018-09-06 | 101 | 6 322  | 34     | 14   | 5    | 7    | 60  | 0   | 0   | 948   | 74   |
| 2018-09-06 | 101 | 18 322 | 206    | 1    | 1    | 5    | 218 | 5   | 100 | 1166  | 91   |
| 2018-09-06 | 101 | 18 322 | 125    | 0    | 8    | 5    | 138 | 0   | 100 | 1304  | 102  |
| 2018-09-08 | 103 | 18 322 | 137    | 3    | 2    | 19   | 162 | 1   | 100 | 1466  | 114  |
| 2018-09-09 | 104 | 18 322 | 124    | 6    | 36   | 158  | 362 | 38  | 100 | 1828  | 143  |
| 2018-09-10 | 105 | 6 322  | 1      | 0    | 0    | 0    | 1   | 0   | 0   | 1829  | 143  |
| 2018-09-10 | 105 | 18 322 | 30     | 14   | 22   | 197  | 584 | 321 | 100 | 2413  | 188  |
| 2018-09-12 | 107 | 18 322 | 257    | 4    | 6    | 34   | 308 | 7   | 100 | 2721  | 212  |
| 2018-09-12 | 107 | 6 322  | 358    | 11   | 2    | 22   | 410 | 17  | 100 | 3131  | 244  |
| 2018-09-13 | 108 | 18 322 | 148    | 6    | 14   | 68   | 244 | 8   | 100 | 3375  | 263  |
| 2018-09-13 | 108 | 2 322  | 101    | 8    | 9    | 63   | 181 | 0   | 99  | 3556  | 277  |
| 2018-09-13 | 108 | 2 322  | 9      | 0    | 0    | 4    | 13  | 0   | 0   | 3569  | 278  |
| 2018-09-14 | 109 | 18 322 | 184    | 6    | 4    | 6    | 216 | 16  | 100 | 3785  | 295  |
| 2018-09-14 | 109 | 6 322  | 238    | 20   | 13   | 8    | 309 | 30  | 100 | 4094  | 319  |
| 2018-09-16 | 111 | 6 322  | 65     | 1    | 4    | 10   | 84  | 4   | 65  | 4178  | 326  |
| 2018-09-16 | 111 | 18 322 | 127    | 0    | 1    | 4    | 132 | 0   | 104 | 4310  | 336  |
| 2018-09-18 | 113 | 6 322  | 126    | 9    | 46   | 22   | 214 | 11  | 100 | 4524  | 353  |
| 2018-09-18 | 113 | 18 322 | 220    | 17   | 17   | 17   | 302 | 31  | 100 | 4826  | 376  |
| 2018-09-18 | 113 | 18 322 | 571    | 8    | 36   | 49   | 710 | 46  | 100 | 5536  | 432  |
| 2018-09-20 | 115 | 6 322  | 7      | 0    | 0    | 2    | 9   | 0   | 0   | 5545  | 432  |
| 2018-09-20 | 115 | 18 322 | 7      | 0    | 0    | 1    | 8   | 0   | 0   | 5553  | 433  |
| 2018-09-20 | 115 | 18 322 | 321    | 0    | 10   | 31   | 379 | 17  | 100 | 5932  | 463  |
| 2018-09-20 | 115 | 6 322  | 118    | 20   | 3    | 5    | 146 | 0   | 100 | 6078  | 474  |
| 2018-09-21 | 116 | 18 322 | 215    | 3    | 1    | 3    | 228 | 6   | 100 | 6306  | 492  |
| 2018-09-21 | 116 | 6 322  | 185    | 1    | 1    | 3    | 200 | 10  | 100 | 6506  | 507  |
| 2018-09-22 | 117 | 18 322 | 193    | 13   | 18   | 29   | 263 | 10  | 100 | 6769  | 528  |
| 2018-09-22 | 117 | 18 322 | 110    | 1    | 9    | 29   | 170 | 21  | 100 | 6939  | 541  |
| 2018-09-23 | 118 | 18 322 | 392    | 5    | 106  | 163  | 761 | 95  | 100 | 7700  | 600  |
| 2018-09-24 | 119 | 6 322  | 152    | 34   | 16   | 22   | 224 | 0   | 100 | 7924  | 618  |
| 2018-09-24 | 119 | 18 322 | 204    | 3    | 5    | 6    | 226 | 8   | 100 | 8150  | 636  |
| 2018-09-26 | 121 | 14 322 | 3      | 0    | 0    | 0    | 3   | 0   | 0   | 8153  | 636  |
| 2018-09-26 | 121 | 14 322 | 156    | 0    | 11   | 15   | 182 | 0   | 100 | 8335  | 650  |
| 2018-09-26 | 121 | 6 322  | 178    | 5    | 17   | 66   | 268 | 2   | 100 | 8603  | 671  |
| 2018-09-26 | 121 | 6 322  | 253    | 13   | 4    | 21   | 291 | 0   | 100 | 8894  | 694  |
| 2018-09-27 | 122 | 18 322 | 409    | 0    | 6    | 41   | 457 | 1   | 100 | 9351  | 729  |
| 2018-09-27 | 122 | 18 322 | 3      | 0    | 0    | 0    | 3   | 0   | 0   | 9354  | 729  |
| 2018-09-28 | 123 | 6 322  | 163    | 3    | 1    | 0    | 168 | 1   | 100 | 9522  | 743  |
| 2018-09-28 | 123 | 18 322 | 4      | 0    | 0    | 0    | 4   | 0   | 0   | 9526  | 743  |

|            |     |        |     |    |     |     |     |     |     |       |      |
|------------|-----|--------|-----|----|-----|-----|-----|-----|-----|-------|------|
| 2018-09-28 | 123 | 18 322 | 11  | 0  | 0   | 2   | 13  | 0   | 0   | 9539  | 744  |
| 2018-09-28 | 123 | 18 322 | 813 | 12 | 16  | 30  | 871 | 0   | 100 | 10410 | 812  |
| 2018-09-29 | 124 | 6 322  | 154 | 19 | 46  | 10  | 241 | 12  | 100 | 10651 | 831  |
| 2018-09-30 | 125 | 18 322 | 253 | 1  | 3   | 22  | 279 | 0   | 100 | 10930 | 852  |
| 2018-10-01 | 126 | 18 322 | 84  | 0  | 0   | 2   | 99  | 13  | 84  | 11029 | 860  |
| 2018-10-01 | 126 | 6 322  | 587 | 28 | 44  | 28  | 687 | 0   | 100 | 11716 | 914  |
| 2018-10-02 | 127 | 18 322 | 132 | 13 | 9   | 32  | 186 | 0   | 100 | 11902 | 928  |
| 2018-10-02 | 127 | 18 322 | 680 | 0  | 9   | 19  | 708 | 0   | 100 | 12610 | 983  |
| 2018-10-02 | 127 | 14 322 | 37  | 4  | 1   | 1   | 55  | 12  | 0   | 12665 | 988  |
| 2018-10-03 | 128 | 6 322  | 45  | 3  | 6   | 19  | 73  | 0   | 0   | 12738 | 993  |
| 2018-10-03 | 128 | 14 322 | 21  | 0  | 4   | 0   | 26  | 1   | 0   | 12764 | 995  |
| 2018-10-03 | 128 | 18 322 | 117 | 1  | 1   | 5   | 124 | 0   | 100 | 12888 | 1005 |
| 2018-10-03 | 128 | 18 322 | 28  | 2  | 0   | 0   | 30  | 0   | 0   | 12918 | 1007 |
| 2018-10-04 | 129 | 14 322 | 28  | 0  | 0   | 18  | 52  | 6   | 0   | 12970 | 1011 |
| 2018-10-04 | 129 | 2 322  | 24  | 3  | 1   | 1   | 35  | 6   | 0   | 13005 | 1014 |
| 2018-10-04 | 129 | 18 322 | 155 | 25 | 5   | 2   | 189 | 2   | 100 | 13194 | 1029 |
| 2018-10-04 | 129 | 2 322  | 8   | 0  | 0   | 0   | 8   | 0   | 0   | 13202 | 1030 |
| 2018-10-05 | 130 | 18 322 | 98  | 1  | 13  | 38  | 170 | 20  | 92  | 13372 | 1043 |
| 2018-10-05 | 130 | 18 322 | 111 | 0  | 0   | 11  | 129 | 7   | 100 | 13501 | 1053 |
| 2018-10-06 | 131 | 6 322  | 1   | 0  | 0   | 0   | 1   | 0   | 0   | 13502 | 1053 |
| 2018-10-06 | 131 | 18 322 | 250 | 6  | 161 | 142 | 720 | 161 | 100 | 14222 | 1109 |
| 2018-10-07 | 132 | 18 322 | 41  | 2  | 4   | 45  | 109 | 17  | 0   | 14331 | 1118 |
| 2018-10-07 | 132 | 18 322 | 3   | 0  | 0   | 1   | 6   | 2   | 0   | 14337 | 1118 |
| 2018-10-08 | 133 | 6 322  | 139 | 13 | 26  | 30  | 228 | 20  | 100 | 14565 | 1136 |
| 2018-10-08 | 133 | 18 322 | 30  | 13 | 4   | 28  | 79  | 4   | 0   | 14644 | 1142 |
| 2018-10-08 | 133 | 18 322 | 20  | 2  | 18  | 36  | 88  | 12  | 0   | 14732 | 1149 |
| 2018-10-09 | 134 | 18 322 | 93  | 8  | 55  | 108 | 333 | 69  | 91  | 15065 | 1175 |
| 2018-10-09 | 134 | 18 322 | 0   | 0  | 0   | 2   | 2   | 0   | 0   | 15067 | 1175 |
| 2018-10-09 | 134 | 6 322  | 77  | 70 | 5   | 24  | 182 | 6   | 77  | 15249 | 1189 |
| 2018-10-10 | 135 | 18 322 | 63  | 1  | 8   | 16  | 97  | 9   | 63  | 15346 | 1197 |
| 2018-10-11 | 136 | 18 322 | 234 | 2  | 2   | 8   | 250 | 4   | 100 | 15596 | 1216 |
| 2018-10-12 | 137 | 6 322  | 42  | 34 | 0   | 5   | 81  | 0   | 0   | 15677 | 1223 |
| 2018-10-12 | 137 | 6 322  | 181 | 7  | 16  | 23  | 227 | 0   | 100 | 15904 | 1240 |
| 2018-10-12 | 137 | 6 322  | 31  | 32 | 5   | 5   | 75  | 2   | 0   | 15979 | 1246 |
| 2018-10-12 | 137 | 18 322 | 144 | 3  | 1   | 13  | 165 | 4   | 100 | 16144 | 1259 |
| 2018-10-14 | 139 | 18 322 | 58  | 0  | 5   | 11  | 75  | 1   | 58  | 16219 | 1265 |
| 2018-10-15 | 140 | 18 322 | 410 | 15 | 8   | 17  | 460 | 10  | 100 | 16679 | 1301 |
| 2018-10-15 | 140 | 6 322  | 203 | 44 | 2   | 0   | 254 | 5   | 100 | 16933 | 1321 |
| 2018-10-15 | 140 | 6 322  | 207 | 26 | 3   | 16  | 284 | 32  | 100 | 17217 | 1343 |
| 2018-10-16 | 141 | 6 322  | 178 | 5  | 4   | 9   | 209 | 13  | 100 | 17426 | 1359 |
| 2018-10-16 | 141 | 6 322  | 68  | 82 | 11  | 4   | 182 | 17  | 66  | 17608 | 1373 |
| 2018-10-16 | 141 | 18 322 | 2   | 0  | 0   | 0   | 2   | 0   | 0   | 17610 | 1373 |
| 2018-10-16 | 141 | 18 322 | 214 | 5  | 3   | 10  | 239 | 7   | 100 | 17849 | 1392 |
| 2018-10-17 | 142 | 14 322 | 324 | 4  | 10  | 16  | 356 | 2   | 100 | 18205 | 1420 |
| 2018-10-17 | 142 | 18 322 | 63  | 6  | 1   | 3   | 75  | 2   | 63  | 18280 | 1426 |
| 2018-10-17 | 142 | 18 322 | 266 | 5  | 2   | 4   | 279 | 2   | 100 | 18559 | 1447 |
| 2018-10-18 | 143 | 14 322 | 114 | 3  | 0   | 0   | 117 | 0   | 100 | 18676 | 1456 |

|            |     |        |        |        |        |       |     |    |     |       |      |
|------------|-----|--------|--------|--------|--------|-------|-----|----|-----|-------|------|
| 2018-10-20 | 145 | 18 322 | 82     | 1      | 0      | 0     | 86  | 3  | 0   | 18762 | 1463 |
| 2018-10-20 | 145 | 18 322 | 198    | 2      | 0      | 13    | 221 | 8  | 0   | 18983 | 1480 |
| 2018-10-20 | 145 | 6 322  | 397    | 26     | 8      | 9     | 444 | 4  | 0   | 19427 | 1515 |
| 2018-10-21 | 146 | 2 322  | 48     | 2      | 1      | 1     | 62  | 10 | 48  | 19489 | 1520 |
| 2018-10-21 | 146 | 6 322  | 58     | 7      | 0      | 0     | 65  | 0  | 0   | 19554 | 1525 |
| 2018-10-21 | 146 | 6 322  | 42     | 38     | 2      | 1     | 92  | 9  | 0   | 19646 | 1532 |
| 2018-10-21 | 146 | 18 322 | 540    | 19     | 25     | 9     | 611 | 18 | 0   | 20257 | 1580 |
| 2018-10-22 | 147 | 18 322 | 91     | 0      | 1      | 17    | 111 | 2  | 91  | 20368 | 1588 |
| 2018-10-22 | 147 | 2 322  | 234    | 12     | 4      | 7     | 277 | 20 | 100 | 20645 | 1610 |
| 2018-10-22 | 147 | 2 322  | 1      | 0      | 1      | 1     | 6   | 3  | 0   | 20651 | 1610 |
| 2018-10-22 | 147 | 6 322  | 76     | 0      | 2      | 0     | 83  | 5  | 76  | 20734 | 1617 |
| 2018-10-23 | 148 | 14 322 | 281    | 0      | 27     | 32    | 346 | 6  | 100 | 21080 | 1644 |
| 2018-10-23 | 148 | 6 322  | 190    | 0      | 58     | 40    | 296 | 8  | 100 | 21376 | 1667 |
| 2018-10-24 | 149 | 6 322  | 50     | 25     | 18     | 0     | 104 | 11 | 50  | 21480 | 1675 |
| 2018-10-24 | 149 | 6 322  | 3      | 5      | 0      | 0     | 8   | 0  | 0   | 21488 | 1676 |
| 2018-10-24 | 149 | 14 322 | 0      | 0      | 3      | 83    | 91  | 5  | 0   | 21579 | 1683 |
| 2018-10-24 | 149 | 18 322 | 2      | 0      | 1      | 0     | 3   | 0  | 0   | 21582 | 1683 |
| 2018-10-25 | 150 | 6 322  | 308    | 5      | 9      | 11    | 337 | 4  | 100 | 21919 | 1709 |
| 2018-10-25 | 150 | 18 322 | 3      | 0      | 0      | 0     | 3   | 0  | 0   | 21922 | 1710 |
| 2018-10-26 | 151 | 6 322  | 224.25 | 0      | 74.75  | 0     | 299 |    | 0   | 22221 | 1733 |
| 2018-10-26 | 151 | 18 322 | 428    | 12     | 9      | 24    | 473 | 0  | 100 | 22694 | 1770 |
| 2018-10-26 | 151 | 18 322 | 467.25 | 77.875 | 77.875 | 0     | 623 |    | 0   | 23317 | 1818 |
| 2018-10-27 | 152 | 6 322  | 118.5  | 0      | 59.25  | 59.25 | 237 |    | 0   | 23554 | 1837 |
| 2018-10-27 | 152 | 18 322 | 112    | 56     | 0      | 56    | 224 |    | 0   | 23778 | 1854 |
| 2018-10-28 | 153 | 14 322 | 372    | 7      | 59     | 32    | 471 | 1  | 100 | 24249 | 1891 |
| 2018-10-28 | 153 | 6 322  | 5      | 1      | 2      | 0     | 8   | 0  | 0   | 24257 | 1892 |
| 2018-10-28 | 153 | 6 322  | 10     | 20     | 0      | 10    | 40  |    | 0   | 24297 | 1895 |
| 2018-10-28 | 153 | 6 322  | 4      | 2      | 2      | 0     | 8   | 0  | 0   | 24305 | 1895 |
| 2018-10-29 | 154 | 2 322  | 71     | 13     | 5      | 8     | 114 | 17 | 71  | 24419 | 1904 |
| 2018-10-29 | 154 | 18 322 | 0      | 0      | 51.5   | 154.5 | 206 |    | 0   | 24625 | 1920 |
| 2018-10-29 | 154 | 6 322  | 172.5  | 0      | 0      | 57.5  | 230 |    | 0   | 24855 | 1938 |
| 2018-10-30 | 155 | 18 322 | 94.5   | 0      | 15.75  | 15.75 | 126 |    | 0   | 24981 | 1948 |
| 2018-10-30 | 155 | 18 322 | 84     | 0      | 0      | 0     | 84  |    | 0   | 25065 | 1955 |
| 2018-10-30 | 155 | 2 322  | 92.7   | 0      | 5.15   | 5.15  | 103 |    | 84  | 25168 | 1963 |
| 2018-10-30 | 155 | 6 322  | 73.5   | 0      | 0      | 73.5  | 147 |    | 0   | 25315 | 1974 |
| 2018-10-30 | 155 | 6 322  | 4      | 4      | 0      | 0     | 8   | 0  | 0   | 25323 | 1975 |
| 2018-10-31 | 156 | 18 322 | 2      | 0      | 1      | 1     | 4   | 0  | 0   | 25327 | 1975 |
| 2018-10-31 | 156 | 18 322 | 528    | 8      | 24     | 36    | 596 |    | 0   | 25923 | 2022 |
| 2018-11-01 | 157 | 6 322  | 54     | 0      | 54     | 0     | 108 |    | 0   | 26031 | 2030 |
| 2018-11-01 | 157 | 18 322 | 0      | 6      | 1      | 1     | 10  | 2  | 0   | 26041 | 2031 |
| 2018-11-02 | 158 | 18 322 | 144.57 | 0      | 1.83   | 36.6  | 183 |    | 0   | 26224 | 2045 |
| 2018-11-02 | 158 | 14 322 | 5      | 0      | 2      | 1     | 9   | 1  | 0   | 26233 | 2046 |
| 2018-11-02 | 158 | 6 322  | 15.3   | 137.7  | 0      | 0     | 153 |    | 0   | 26386 | 2058 |
| 2018-11-02 | 158 | 6 322  | 56.25  | 62.5   | 1.25   | 5     | 125 |    | 0   | 26511 | 2067 |
| 2018-11-02 | 158 | 2 322  | 2      | 0      | 0      | 1     | 5   | 2  | 0   | 26516 | 2068 |
| 2018-11-02 | 158 | 2 322  | 46     | 15     | 23     | 102   | 229 | 43 | 0   | 26745 | 2086 |
| 2018-11-03 | 159 | 18 322 | 2      | 1      | 0      | 0     | 3   | 0  | 0   | 26748 | 2086 |

|            |     |        |        |       |       |        |     |   |     |       |      |
|------------|-----|--------|--------|-------|-------|--------|-----|---|-----|-------|------|
| 2018-11-03 | 159 | 18 322 | 95     | 0     | 0     | 95     | 190 |   | 0   | 26938 | 2101 |
| 2018-11-03 | 159 | 14 322 | 78     | 0     | 6     | 0      | 84  | 0 | 78  | 27022 | 2107 |
| 2018-11-04 | 160 | 6 322  | 92.5   | 0     | 0     | 92.5   | 185 |   | 0   | 27207 | 2122 |
| 2018-11-04 | 160 | 6 322  | 19.5   | 0     | 9.75  | 9.75   | 39  |   | 0   | 27246 | 2125 |
| 2018-11-04 | 160 | 18 322 | 479.25 | 0     | 0     | 159.75 | 639 |   | 0   | 27885 | 2175 |
| 2018-11-05 | 161 | 6 322  | 40.5   | 12.15 | 12.15 | 16.2   | 81  |   | 0   | 27966 | 2181 |
| 2018-11-05 | 161 | 18 322 | 14     | 0     | 0     | 0      | 14  |   | 0   | 27980 | 2182 |
| 2018-11-06 | 162 | 6 322  | 135.3  | 98.4  | 7.38  | 4.92   | 246 |   | 0   | 28226 | 2201 |
| 2018-11-06 | 162 | 6 322  | 345.51 | 3.49  | 0     | 0      | 349 |   | 0   | 28575 | 2228 |
| 2018-11-06 | 162 | 18 322 | 226.1  | 0     | 0     | 11.9   | 238 |   | 0   | 28813 | 2247 |
| 2018-11-06 | 162 | 2 322  | 0      | 0     | 0     | 0      | 1   | 1 | 0   | 28814 | 2247 |
| 2018-11-06 | 162 | 2 322  | 126    | 1     | 24    | 6      | 166 | 9 | 100 | 28980 | 2260 |
| 2018-11-07 | 163 | 18 322 | 4      | 0     | 0     | 1      | 5   | 0 | 0   | 28985 | 2260 |
| 2018-11-07 | 163 | 18 322 | 14     | 2     | 0     | 3      | 19  | 0 | 0   | 29004 | 2262 |
| 2018-11-07 | 163 | 18 322 | 219.8  | 15.7  | 15.7  | 62.8   | 314 |   | 0   | 29318 | 2286 |
| 2018-11-07 | 163 | 14 322 | 240    | 11    | 6     | 63     | 321 | 1 | 100 | 29639 | 2311 |
| 2018-11-07 | 163 | 2 322  | 4      | 1     | 0     | 0      | 5   | 0 | 0   | 29644 | 2312 |
| 2018-11-08 | 164 | 6 322  | 55     | 0     | 55    | 0      | 110 |   | 0   | 29754 | 2320 |
| 2018-11-08 | 164 | 6 322  | 21     | 21    | 42    | 0      | 84  |   | 0   | 29838 | 2327 |
| 2018-11-09 | 165 | 14 322 | 200    | 0     | 2     | 17     | 221 | 2 | 100 | 30059 | 2344 |
| 2018-11-09 | 165 | 6 322  | 13.8   | 124.2 | 0     | 0      | 138 |   | 0   | 30197 | 2355 |
| 2018-11-10 | 166 | 6 322  | 0      | 1     | 0     | 2      | 12  | 9 | 0   | 30209 | 2356 |
| 2018-11-11 | 167 | 6 322  | 441.75 | 9.3   | 4.65  | 9.3    | 465 |   | 0   | 30674 | 2392 |
| 2018-11-11 | 167 | 6 322  | 49.05  | 43.6  | 5.45  | 10.9   | 109 |   | 0   | 30783 | 2401 |
| 2018-11-11 | 167 | 14 322 | 272    | 1     | 2     | 8      | 283 | 0 | 100 | 31066 | 2423 |
| 2018-11-11 | 167 | 18 322 | 25     | 0     | 0     | 0      | 25  | 0 | 0   | 31091 | 2425 |
| 2018-11-12 | 168 | 18 322 | 379.05 | 0     | 0     | 19.95  | 399 |   | 0   | 31490 | 2456 |
| 2018-11-12 | 168 | 18 322 | 105    | 0     | 0     | 35     | 140 |   | 0   | 31630 | 2467 |
| 2018-11-12 | 168 | 6 322  | 75     | 37.5  | 0     | 37.5   | 150 |   | 0   | 31780 | 2478 |
